# Supplementary material for: The E3 state of FeMoco: one hydride, two hydrides or dihydrogen?
Source: Royal Society of Chemistry journal article supplement (doi:10.1039/d3cp01106b), 2023-01-01
Supplement: d3cp01106b2.pdf [file d3cp01106b2.pdf]

# ELECTRONIC SUPPLEMENTARY INFORMATION

## The $E_3$ state of FeMoco: one hydride, two hydrides or dihydrogen?

Yunjie Pang<sup>a,b</sup> and Ragnar Bjornsson<sup>b,c\*</sup>

<sup>a</sup>College of Chemistry, Beijing Normal University, 100875, Beijing, China.

<sup>b</sup>Max-Planck Institute for Chemical Energy Conversion, Stiftstrasse 34-36, 45470 Mülheim an der Ruhr, Germany.

<sup>c</sup>Present address: Univ. Grenoble Alpes, CNRS, CEA, IRIG, Laboratoire de Chimie et Biologie des Métaux, 17 Rue des Martyrs, F-38054 Grenoble, Cedex, France. E-mail: ragnar.bjornsson@cea.fr

### Contents

|                                                                                                                                  |           |
|----------------------------------------------------------------------------------------------------------------------------------|-----------|
| <b>1. Definitions of QM-regions and additional energetic results .....</b>                                                       | <b>2</b>  |
| <b>2. Results for a CBS<sub>26</sub>-BH<sub>26</sub>-TH<sub>6</sub> model .....</b>                                              | <b>4</b>  |
| <b>3. Results for CBS<sub>26</sub>-DH<sub>6</sub> models.....</b>                                                                | <b>5</b>  |
| <b>4. Additional results of the 2-hyd-CBS class .....</b>                                                                        | <b>6</b>  |
| <b>5. Electron configurations of <math>E_0</math> and <math>E_3</math> states based on localized orbital analysis.....</b>       | <b>9</b>  |
| <b>6. N<sub>2</sub> binding to the <math>E_3</math> state models.....</b>                                                        | <b>12</b> |
| <b>7. Orientations of protons of protonated S2B and S5A.....</b>                                                                 | <b>14</b> |
| <b>8. Additional information on spin-state and BS-state energies .....</b>                                                       | <b>18</b> |
| <b>9. Additional results for different functionals .....</b>                                                                     | <b>21</b> |
| <b>10. Additional comparisons for three lowest-energy isomers: dispersion correction and zero-point vibrational energy .....</b> | <b>32</b> |
| <b>11. The results of the C3H model.....</b>                                                                                     | <b>34</b> |
| <b>12. The energies, spin populations of investigated models .....</b>                                                           | <b>35</b> |
| <b>References.....</b>                                                                                                           | <b>58</b> |

## 1. Definitions of QM-regions and additional energetic results

Figure S1 shows the definitions of the three QM regions used in this study. The QM-A region was used to systematically explore all possible models in three spin states and 35 BS states (per spin state) and also used in optimizations comparing different functionals (B97-D3, r<sup>2</sup>SCAN, TPSSh, B3LYP\*, B3LYP, and TPSS). The QM-B region was utilized to optimize the lowest-energy state for each model (according to the results of the QM-A region). Finally, single-point calculations were carried out using the large QM-C region based on the optimized geometry of the QM-B region.

The QM-cluster model is identical to the QM-A region but instead of an MM environment, the cluster is surrounded by a continuum. The r<sup>2</sup>SCAN functional was used and the same basis set as in the QM/MM calculations. The CPCM solvation model was used (relevant parameters:  $\epsilon = 4$ , refrac: 1.3300; rsolv: 1.3000; surface type: Gaussian vdW; radius for H, C, N, O, S, Fe, and Mo: 1.32, 2.04, 1.86, 1.82, 2.16, 2.40, and 2.40 Å, respectively). During optimizations of the cluster model, His195, homocitrate and Cys275 were kept frozen; this is necessary as the anionic homocitrate is otherwise not well described and spontaneous proton transfer between His442 and homocitrate would occur. All other atoms were allowed to move.

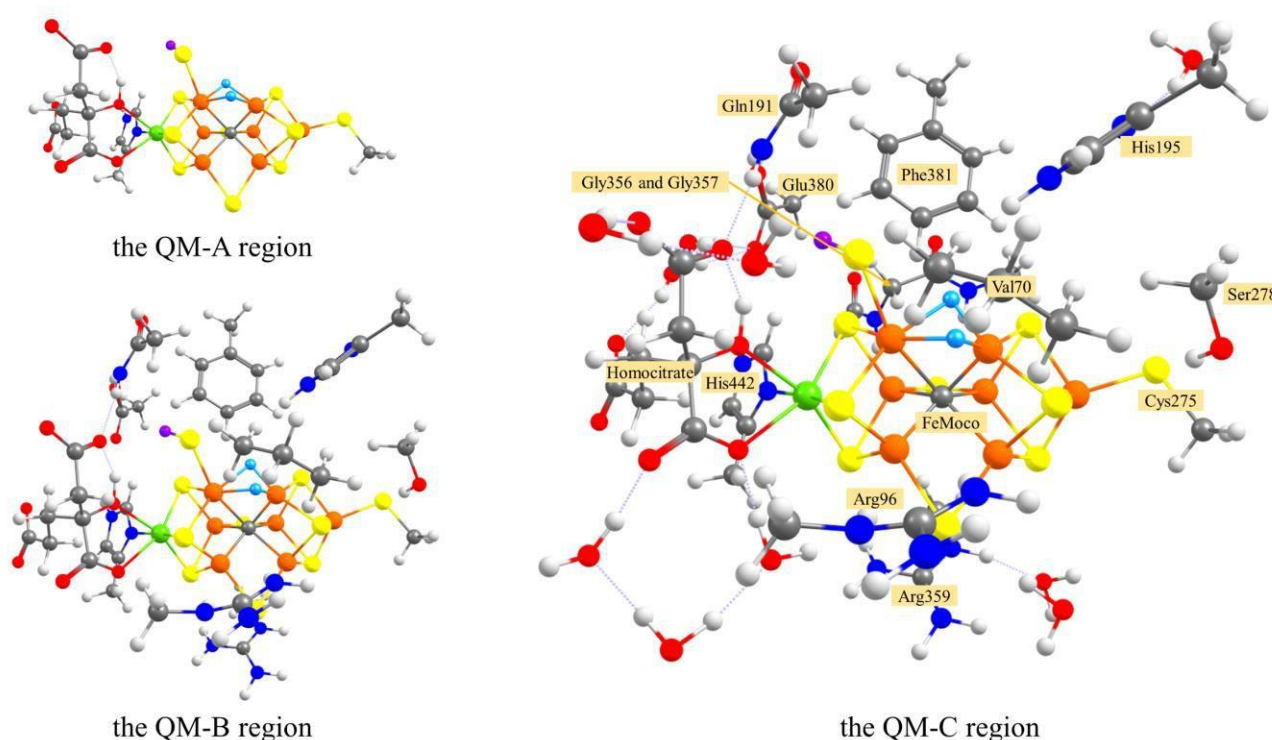

Figure S1. The definitions of QM regions. The number of atoms in the QM-A, QM-B, and QM-C regions are 59, 145, and 191 (link-atoms included), respectively.

There are 27 water molecules within 10 Å of iron ions of  $\alpha$ -FeMoco in the crystal structure (PDB: 3U7Q<sup>1</sup>), and most of them located around the negatively charged homocitrate (see Figure S2a). Figure S2c shows the positions of 10 water molecules in the QM-C region after optimization. Compared to the crystal structure (Figure S2b), two water molecules labelled ② and ④ have moved 2.21 and 3.7 Å.

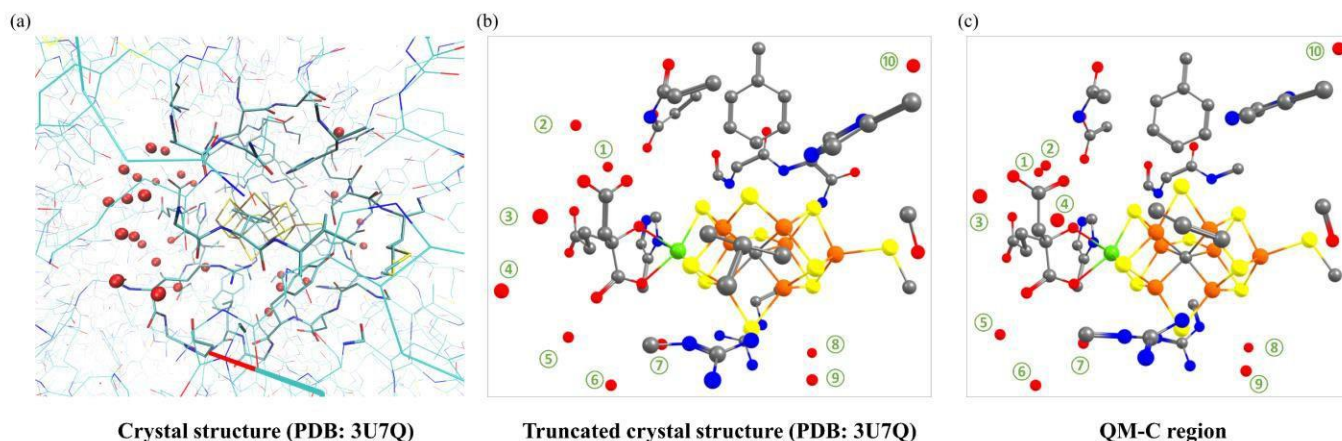

Figure S2. Comparison of the water molecules in X-ray structure (a and b) and the QM/MM optimized calculation using the QM-C region. Red balls indicate water molecules. X-ray structure PDB ID: 3U7Q<sup>1</sup>.

Figure S3 shows the relative energies of models **e-q** (see Figure 2 in article for definitions) using different QM-region QM/MM calculations. Also shown are the results of the QM-cluster model using a model with the same size as the QM/MM-QM-A region. As shown, the QM/MM calculations, give a consistent trend towards convergence in going from QM-A, QM-B to QM-C region, with some minor deviations for QM-A. The cluster model (despite having the same QM-cluster size as the QM/MM-QM-A calculation) behaves quite different from QM/MM results, due to the lack of protein environment around FeMoco. The QM-cluster model correctly predicts the stability associated with **2hyd-OBS** models (**g-l**) but is not capable of correctly differentiating between the isomers, in particular due to the lack of residues like His195 that interact with e.g. the terminal sulfhydryl group in those isomers. A QM-cluster model that includes surrounding protein residues would be able to incorporate such effects, but this was not further explored in this work.

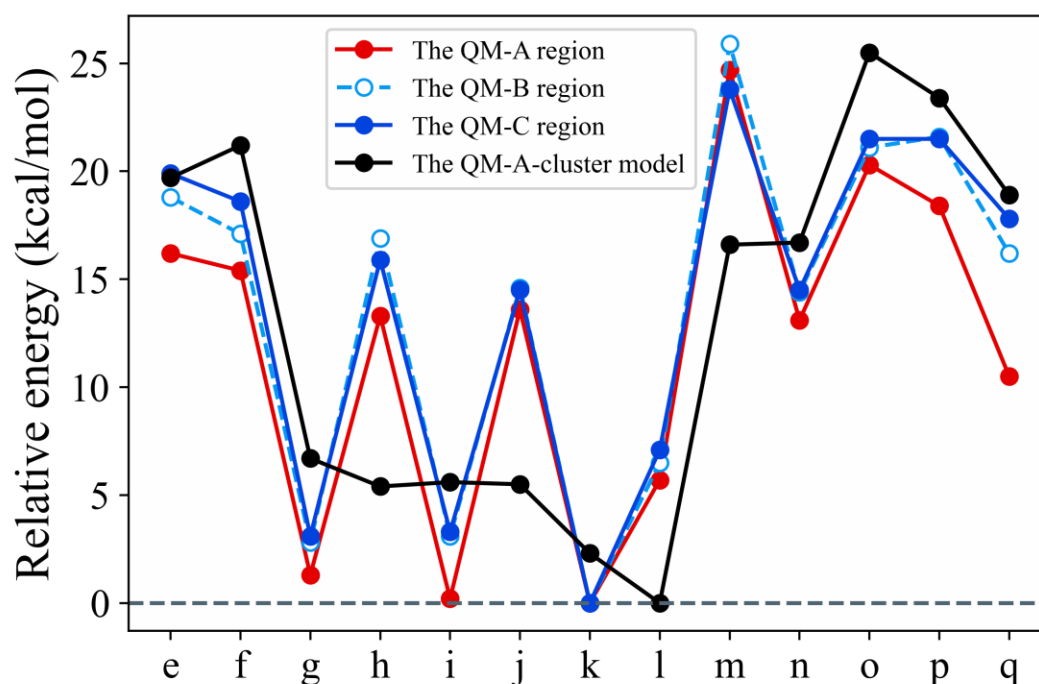

Figure S3. The relative energies of models (**e-q**) using the QM-A, QM-B, and QM-C regions from the QM/MM calculations compared to the QM-A-cluster model ( $r^2$ SCAN functional used). The spin states and BS solutions of each model are the same as used for the data in Figure 2 of the manuscript.

## 2. Results for a $\text{CBS}_{26}\text{-BH}_{26}\text{-TH}_6$ model

Figure S4 shows the results of a  $\text{CBS}_{26}\text{-BH}_{26}\text{-TH}_6$  model that were reported to be a little higher than the lowest-energy isomer (**3H.2x.26.2bterm**) in a study by Dance<sup>2</sup>. He found that there is a small energy difference between  $M_S = 1$  and 0. We explored this model in the spin state of  $M_S = 0$  (suggested by Dance) using all possible 35 BS solutions and our  $r^2\text{SCAN}$ -based QM/MM protocol. Our results reveal that geometry optimizations of all 35 BS solutions converged to an isomer best described as  $\text{CBS}_{26}\text{-2TH}_6$  i.e. containing two terminal hydrides at Fe6, which was found to be higher than the lowest energy isomer (**OBS<sub>6</sub>-DH<sub>2</sub>**, see Figure 2k in the manuscript) by 12.3 kcal/mol ( $r^2\text{SCAN}$  is used). We note in this context that a hydride in a partially bridging hydride conformation is only classified as bridging (and drawn as such) if both Fe-H distances were not longer than 2.0 Å.

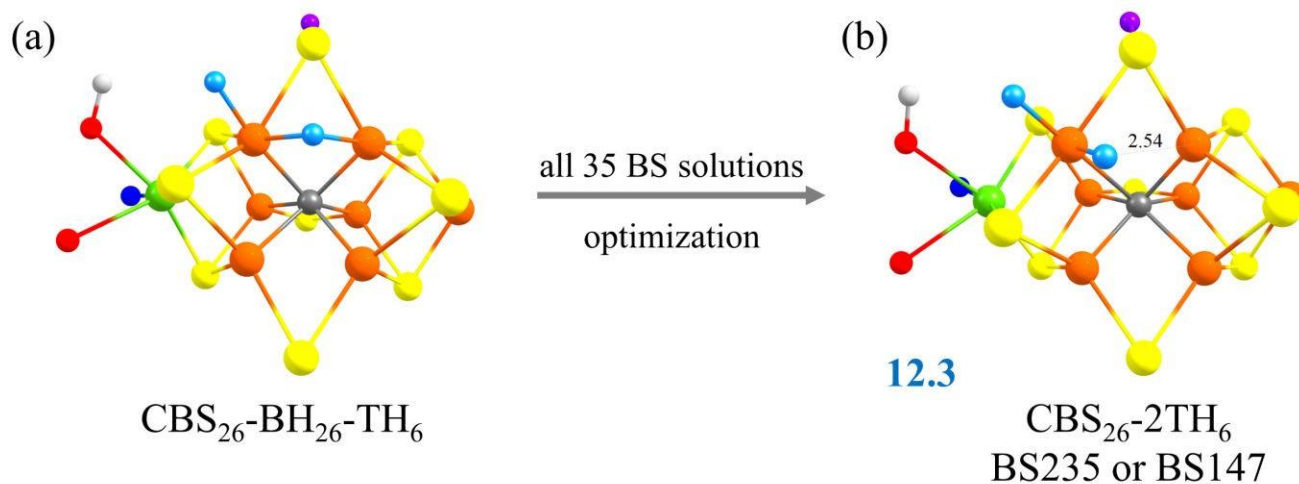

Figure S4. All states of the  $\text{CBS}_{26}\text{-BH}_{26}\text{-TH}_6$  (a) in  $M_S = 0$  and 35 BS solutions were converged to  $\text{CBS}_{26}\text{-2TH}_6$  (b) using the QM-A region and  $r^2\text{SCAN}$ . The lowest-energy state of the  $\text{CBS}_{26}\text{-2TH}_6$  is 12.3 kcal/mol relative to the lowest model **OBS<sub>6</sub>-DH<sub>2</sub>** (see Figure 2k in the manuscript).

### 3. Results for CBS<sub>26</sub>-DH<sub>6</sub> models

A H<sub>2</sub>-bound E<sub>3</sub> model with a closed belt sulfide-bridge, CBS<sub>26</sub>-DH<sub>6</sub> (see Figure S5) was previously found to be quite favorable in a study by Dance.<sup>2</sup> Such a model was investigated here in a spin state of M<sub>S</sub> = 0 (as suggested by Dance) with all possible 35 BS solutions using the QM-A region and r<sup>2</sup>SCAN. We found that only one BS solution (BS257) resulted in the suggested structure with a H<sub>2</sub> bound, which is 28.3 kcal/mol higher than the OBS<sub>6</sub>-DH<sub>2</sub> model (see Figure 2k in the manuscript). For all other BS states, H<sub>2</sub> dissociated (corresponds to falling back to the E<sub>1</sub> redox state).

In contrast, models with an H<sub>2</sub> ligand and an open belt sulfide-bridge (instead of a closed belt sulfide-bridge like here) are stable and low energy structures (see Figure 2 k and l in the manuscript). Our results thus suggest that H<sub>2</sub>-bound FeMoco structures at the E<sub>3</sub> redox level are stabilized by having an open belt sulfide-bridge present.

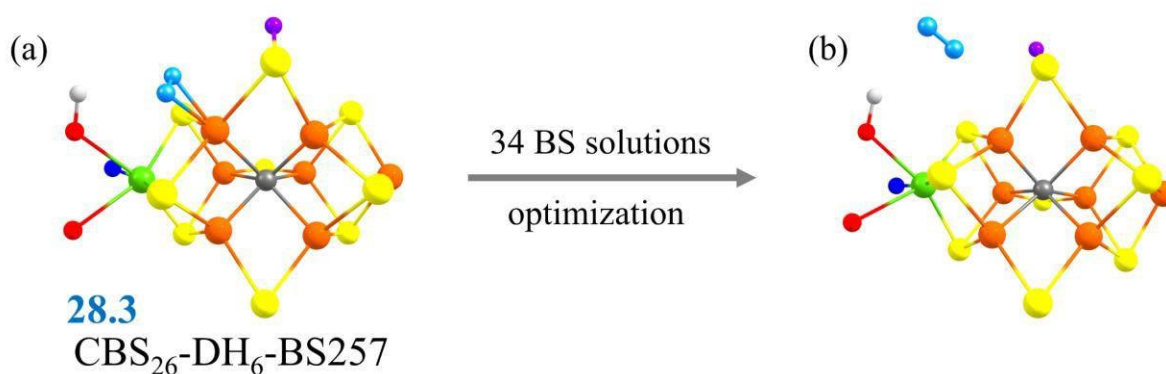

Figure S5. Results of a model containing a closed protonated belt sulfide-bridge, one H<sub>2</sub> at Fe6 in the spin state of M<sub>S</sub> = 0 and 35 BS solutions using the QM-A region and r<sup>2</sup>SCAN. The energy in blue of (a) is relative to the lowest model OBS<sub>6</sub>-DH<sub>2</sub> (see Figure 2k in the manuscript).



#### 4. Additional results of the 2-hyd-CBS class

The optimized geometries of **CBS<sub>26</sub>-2BH<sub>26(5),37</sub>**, **CBS<sub>26</sub>-2BH<sub>26(3),37</sub>**, **CBS<sub>37</sub>-2BH<sub>26(5),37</sub>**, and **CBS<sub>37</sub>-2BH<sub>26(3),37</sub>** models are shown in Figure S6 to Figure S9. These four models contain two bridging hydrides between different pairs of iron ions (Fe2/Fe6 and Fe3/Fe7) and a protonated closed belt sulfide-bridge at S2B (between Fe2 and Fe6) or S5A (between Fe3 and Fe7), which are similar to **E<sub>4</sub>-2CBS<sub>26,37</sub>-2BH<sub>26(3),37</sub>** and **E<sub>4</sub>-2CBS<sub>26,37</sub>-2BH<sub>26(5),37</sub>** models (see Figure 1 in the manuscript) in the **E<sub>4</sub>** state but with one less proton (the charge of FeMoco remains the same). A previous study<sup>3</sup> reported that such **E<sub>4</sub>** models are stable, however, most BS states of four **E<sub>3</sub>** models designed from them converged to other models with one or two terminal hydrides, shown in Figure S6 to Figure S9, which is similar to results reported by Ryde and Jiang<sup>4</sup> (please see models **352\_** and **552\_** in that paper).

We found that four converged models **CBS<sub>37</sub>-BH<sub>37</sub>-TH<sub>2</sub>** (Figure S6b), **CBS<sub>37</sub>-2TH<sub>6,7</sub>** (Figure S6c), **CBS<sub>26</sub>-BH<sub>26</sub>-TH<sub>3</sub>** (Figure S8c), and **CBS<sub>37</sub>-BH<sub>37</sub>-TH<sub>2</sub>** (Figure S9b) are higher than the lowest-energy model (**OBS<sub>6</sub>-DH<sub>2</sub>**, Figure 2k in the manuscript) between 15 and 20 kcal/mol, which are similar to two models (see Figure 2 e and f in the manuscript suggested by Ryde and Cao) in energy and geometry<sup>5</sup>.

According to results of the **CBS<sub>37</sub>-2BH<sub>26(3),37</sub>** in three spin states ( $M_S = 0, 1, \text{ and } 2$ ) and 35 BS solutions (Figure S6), models with a protonated closed belt-sulfide bridge and 2 bridging hydrides between different pairs of iron ions are unstable and converge to structures with 1 or 2 mostly-terminal hydrides. Energies between three spin states are small for this type of models containing two bridging hydrides between different pairs of iron ions in this study, and Dance found that  $M_S = 1$  and 0 are also small for the **E<sub>3</sub>** state in his study<sup>2</sup>. Therefore, we performed optimizations for **CBS<sub>26</sub>-2BH<sub>26(3),37</sub>**, **CBS<sub>26</sub>-2BH<sub>26(5),37</sub>**, and **CBS<sub>37</sub>-2BH<sub>26(5),37</sub>** models with  $M_S = 1$  and 35 BS solutions.

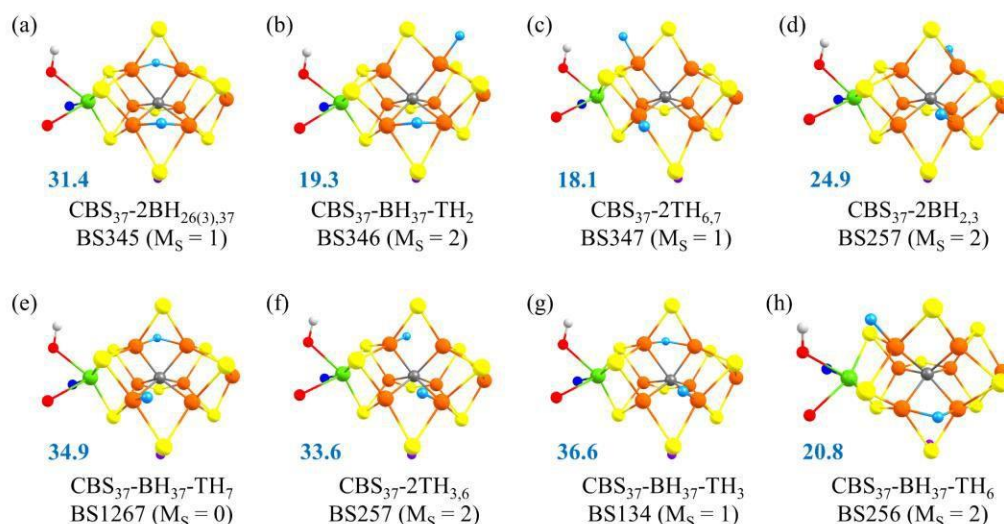

Figure S6. Models (a-h) converged from 35 BS solutions and three spin states starting from **CBS<sub>37</sub>-2BH<sub>26(3),37</sub>** (a). The energies calculated using QM-A region and  $r^2$ SCAN in blue are the lowest-energy one for each model, which are relative to the lowest model **OBS<sub>6</sub>-DH<sub>2</sub>** (see Figure 2k in the manuscript). A hydride is defined as bridging only if both Fe-H distances in Fe-H-Fe are not longer than 2.0 Å.

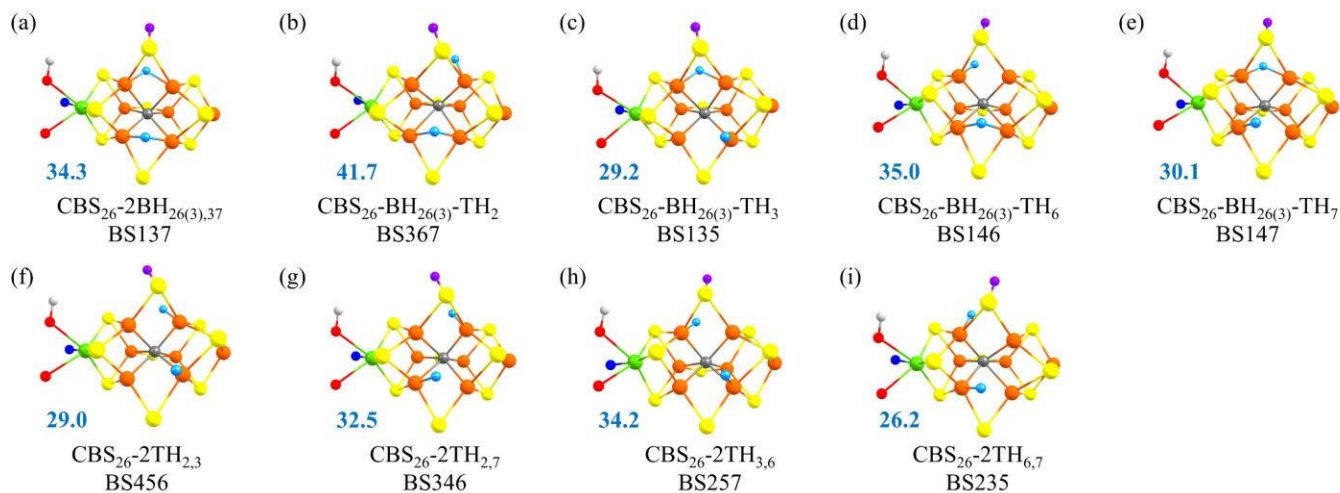

Figure S7. Models (a-i) converged from 35 BS solutions and the spin state of  $M_S = 1$  starting from **CBS<sub>26</sub>-2BH<sub>26(3),37</sub>** (a). The energies calculated using QM-A region and  $r^2$ SCAN in blue are the lowest-energy version of each model, which are relative to the lowest model **OBS<sub>6</sub>-DH<sub>2</sub>** (see Figure 2k in the manuscript). A hydride is defined as bridging only if both Fe-H distances in Fe-H-Fe are not longer than 2.0 Å.

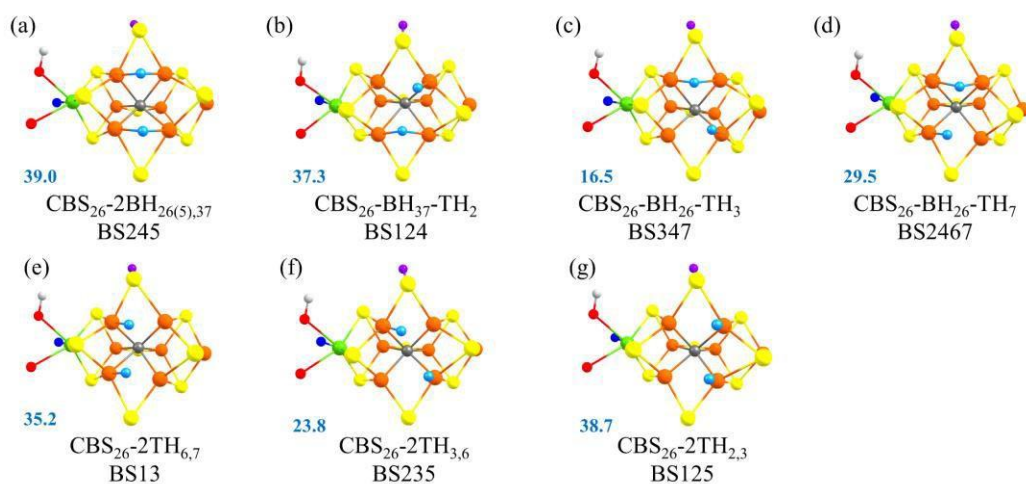

Figure S8. Models (a-g) are converged from optimizations starting from **CBS<sub>26</sub>-2BH<sub>26(5),37</sub>** (a) in the spin state of  $M_S = 1$  and 35 BS solutions. The energies calculated using QM-A region and  $r^2$ SCAN in blue are the lowest-energy version for each model, which are relative to the lowest model **OBS<sub>6</sub>-DH<sub>2</sub>** (see Figure 2k in the manuscript). A hydride is defined as bridging only if both Fe-H distances in Fe-H-Fe are not longer than 2.0 Å.

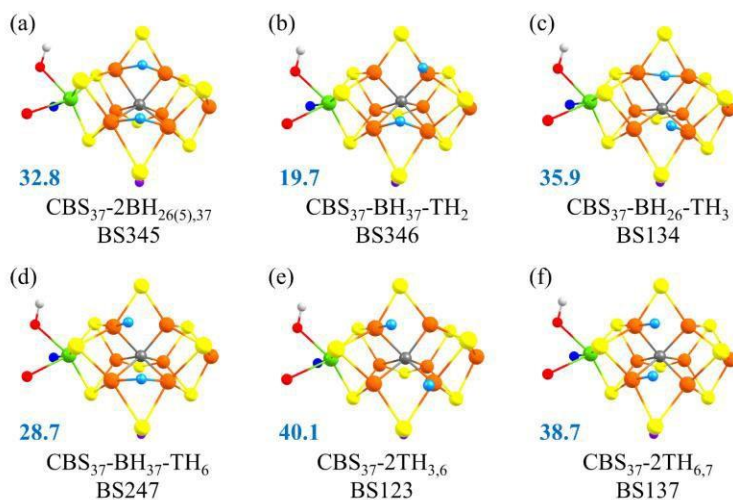

Figure S9. Models (a-f) are the lowest-energy structures found when using the structure in **CBS<sub>37</sub>-2BH<sub>26(5),37</sub>** (a) as starting structure in the spin state of  $M_S = 1$  and 35 BS solutions. The energies calculated using QM-A region and

$r^2$ SCAN in blue are the lowest-energy version for each model, and their relative energies in blue are relative to the lowest model **OBS<sub>6</sub>-DH<sub>2</sub>** (see Figure 2k in the manuscript). A hydride is defined as bridging only if both Fe-H distances in Fe-H-Fe are not longer than 2.0 Å.

The **CBS<sub>26</sub>-BH<sub>26</sub>-TH<sub>5</sub>** suggested by Ryde and co-workers<sup>5</sup> is also investigated here. However, we obtained some other models (**CBS<sub>26</sub>-2TH<sub>5,6</sub>** and **CBS<sub>26</sub>-2TH<sub>2,5</sub>**) with a mostly terminal hydride at Fe2 or Fe6 (see Figure S10).

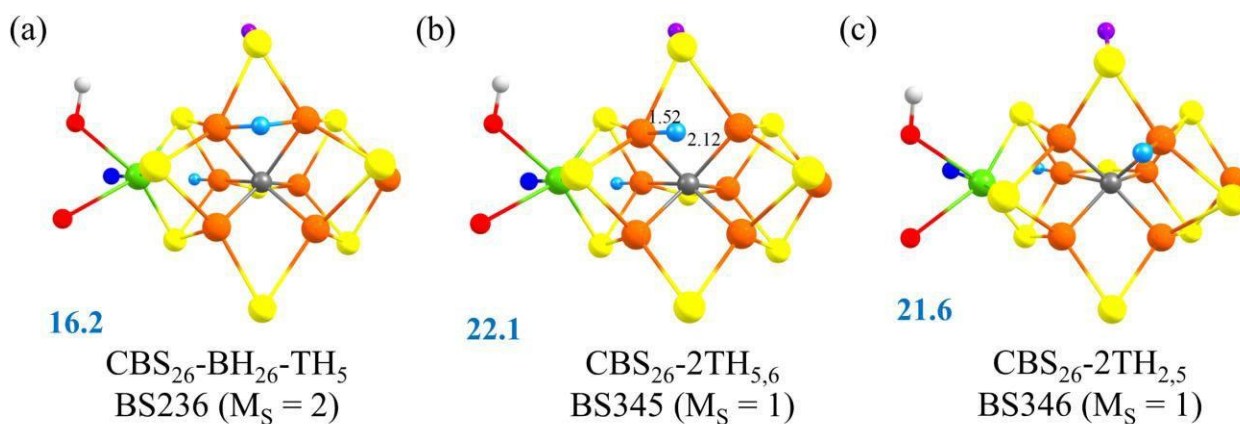

Figure S10. Models (a-c) are the lowest-energy structures found when using the structure **CBS<sub>26</sub>-BH<sub>26</sub>-TH<sub>5</sub>** (a) suggested by Ryde and co-workers<sup>5</sup> as starting structure in three spin states and 35 BS solutions. The energies calculated using QM-A region and  $r^2$ SCAN in blue are the lowest-energy version for each model, and their relative energies in blue are relative to the lowest model **OBS<sub>6</sub>-DH<sub>2</sub>** (see Figure 2k in the manuscript). A hydride is defined as bridging version if both Fe-H distances in Fe-H-Fe are not longer than 2.0 Å.



## 5. Electron configurations of $E_0$ and $E_3$ states based on localized orbital analysis

Figure S11 shows the electron configurations as interpreted from a localized orbital analysis of the BS7 class of the  $E_0$  state.

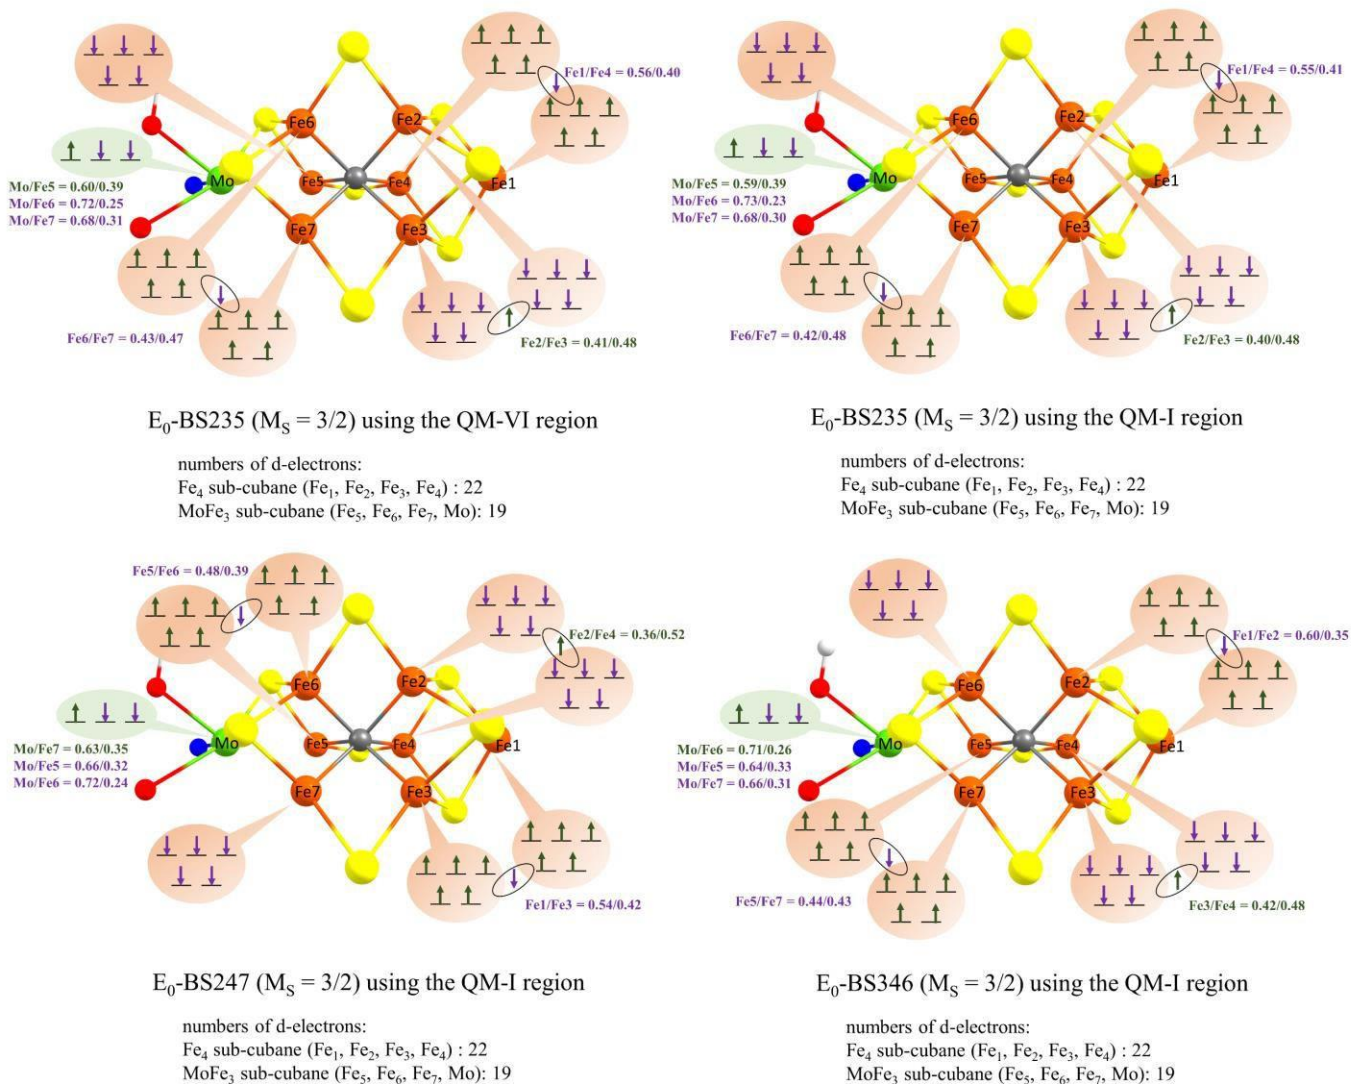

Figure S11. The localized orbital analysis of the BS7 class including BS235, BS247, and BS346 with  $M_S = 3/2$  of the  $E_0$  state from our previous paper ( $r^2$ SCAN used)<sup>3</sup>. The QM-I and QM-VI regions defined in our previous paper are the same as the QM-A and QM-C regions in the present study, respectively.

The localized orbitals associated with hydrides or  $H_2$  of **OBS<sub>6</sub>-DH<sub>2</sub>-BS147** ( $M_S = 1$ ), **OBS<sub>6</sub>-BH<sub>26</sub>-TH<sub>2</sub>-BS235** ( $M_S = 2$ ), and **OBS<sub>6</sub>-2BH<sub>26</sub>-BS347** ( $M_S = 1$ ) models are shown in Figure S12 to Figure S14.

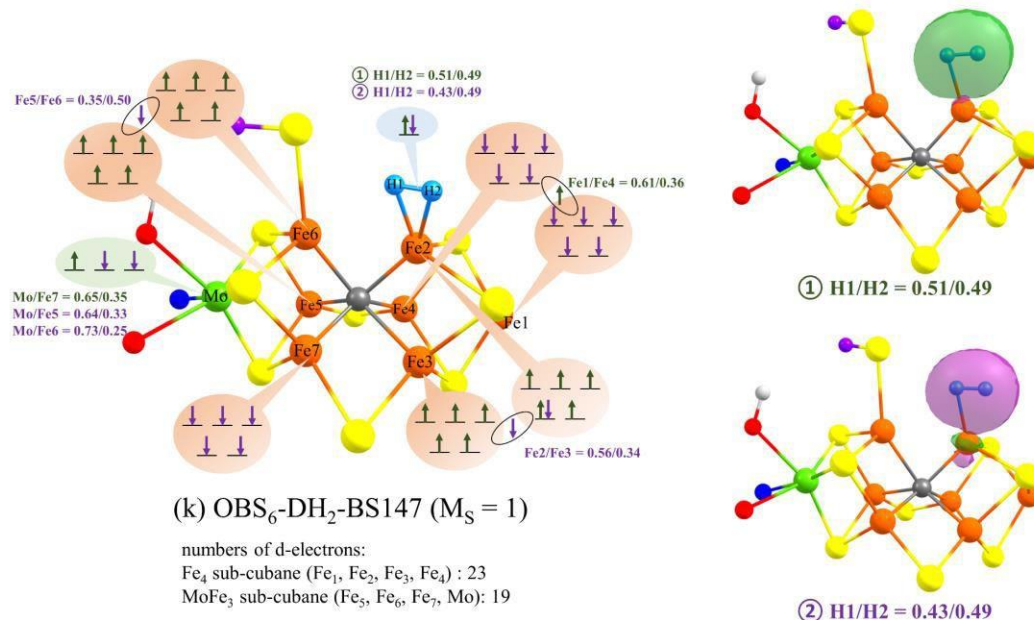

Figure S12. The localized orbital analysis of  $OBS_6-DH_2-BS147$  ( $M_S = 1$ ) using the QM-C region and  $r^2SCAN$ . Alpha-spin electrons are shown in green and beta-spin electrons in purple. Numbers in green and purple indicate the localized orbital populations of alpha and beta electrons, respectively.

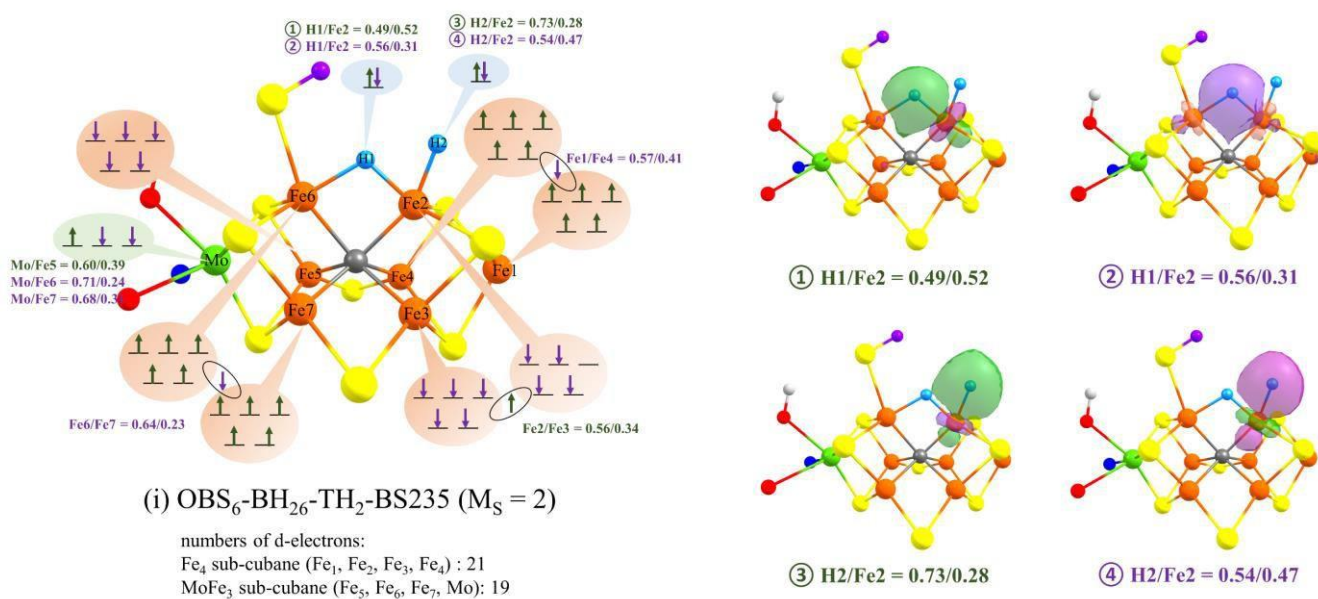

Figure S13. The localized orbital analysis of  $OBS_6-BH_{26}-TH_2-BS235$  ( $M_S = 2$ ) using the QM-C region and  $r^2SCAN$ . Alpha-spin electrons are shown in green and beta-spin electrons in purple. Numbers in green and purple indicate the localized orbital populations of alpha and beta electrons, respectively.

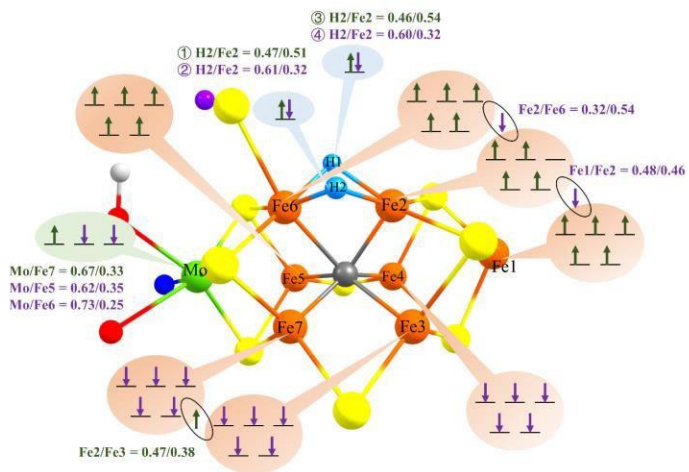

(g)  $\text{OBS}_6\text{-2BH}_{26}\text{-BS347}$  ( $M_S = 1$ )

numbers of d-electrons:

$\text{Fe}_4$  sub-cubane ( $\text{Fe}_1, \text{Fe}_2, \text{Fe}_3, \text{Fe}_4$ ): 21

$\text{MoFe}_3$  sub-cubane ( $\text{Fe}_5, \text{Fe}_6, \text{Fe}_7, \text{Mo}$ ): 19

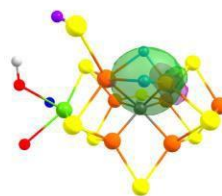

①  $\text{H2/Fe2} = 0.47/0.51$

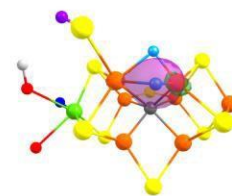

②  $\text{H2/Fe2} = 0.61/0.32$

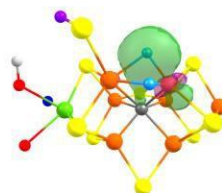

③  $\text{H2/Fe2} = 0.46/0.54$

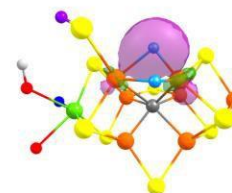

④  $\text{H2/Fe2} = 0.60/0.32$

Figure S14. The localized orbital analysis of  $\text{OBS}_6\text{-2BH}_{26}\text{-BS347}$  ( $M_S = 1$ ) using the QM-C region and  $r^2\text{SCAN}$ . Alpha-spin electrons are shown in green and beta-spin electrons in purple. Numbers in green and purple indicate the localized orbital populations of alpha and beta electrons, respectively.

## 6. N<sub>2</sub> binding to the E<sub>3</sub> state models

Figure S15 shows the binding energy of N<sub>2</sub> to either Fe2 or Fe6 site in the **OBS-2BH<sub>26</sub>** model of the E<sub>3</sub> state, in three spin states and 35 BS solutions using the QM-A region.

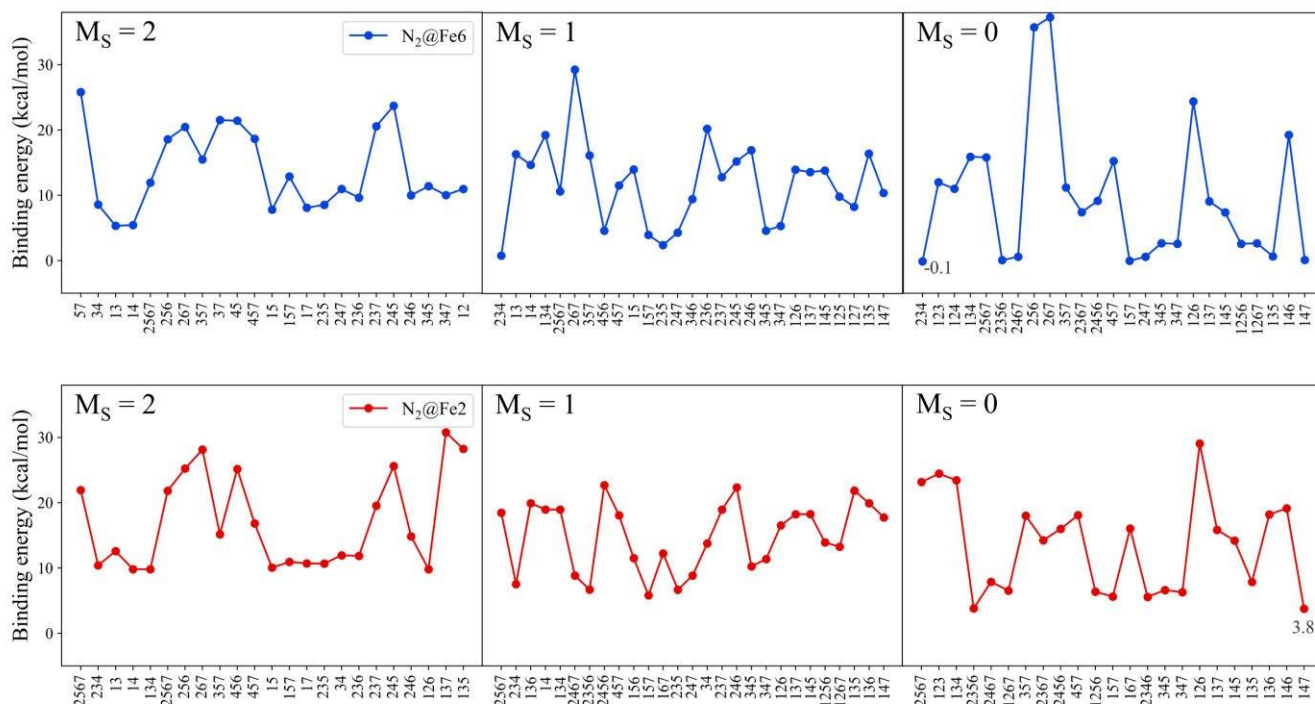

Figure S15. The binding energy of N<sub>2</sub> binding to the Fe2 of **OBS<sub>6</sub>-2BH<sub>26</sub>** or Fe6 of **OBS<sub>2</sub>-2BH<sub>26</sub>** in three spin states and 35 BS solutions using the QM-A region and r<sup>2</sup>SCAN. Binding energies are relative to the lowest-energy model **OBS<sub>6</sub>-DH<sub>2</sub>** (Figure 2k in the manuscript, r<sup>2</sup>SCAN used).

The ligand field diagram of N<sub>2</sub> bound states were derived from the combination of localized orbital analysis, diamagnetic substitution, and quasi-restricted orbital analysis.<sup>3</sup> The structure in Figure S16a was calculated using the QM-C region, which was analysed by using the localized orbital method indicating that the Fe2 in **OBS<sub>6</sub>-2BH<sub>26</sub>-N<sub>2</sub>@Fe2** is low-spin Fe<sup>3+</sup>. The Fe and Mo except Fe2 ions were then diamagnetically substituted by Ga<sup>3+</sup> and In<sup>3+</sup>, respectively (see Figure S16b). The single-point calculation of the diamagnetic model with an Fe<sup>3+</sup> (*S* = 1/2) was carried out and used to obtain quasi-restricted orbitals (shown in Figure S16), which finally was used to make ligand-field diagram. The *d<sub>xz</sub>* and *d<sub>yz</sub>* orbitals of diamagnetically substituted FeMoco of **OBS<sub>6</sub>-2BH<sub>26</sub>-N<sub>2</sub>@Fe2** overlap with π\* orbitals of N<sub>2</sub>.



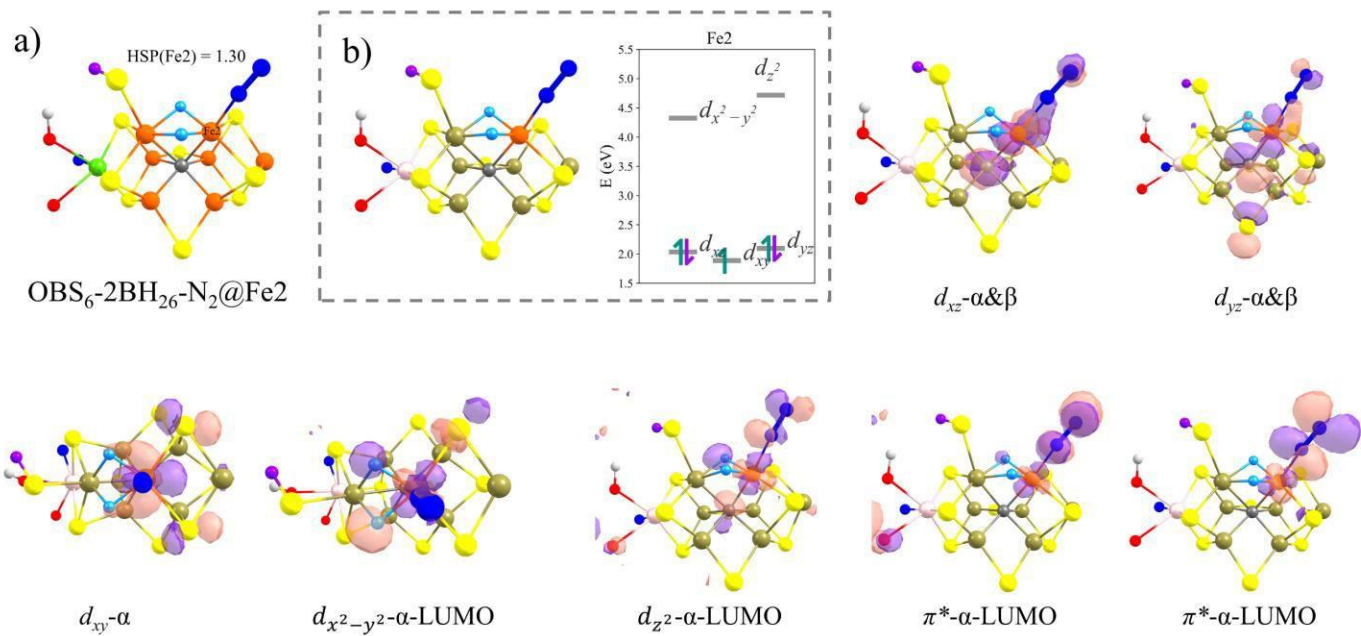

Figure S16. The structures of  $\text{OBS}_6\text{-}2\text{BH}_2\text{-N}_2\text{@Fe2-BS147}$  ( $M_S = 0$ ) with a full FeMoco (a) and diamagnetically substituted FeMoco (b) using the QM-C region and r<sup>2</sup>SCAN. Also shown is the ligand-field diagram based on the diamagnetically substituted FeMoco and the quasi-restricted orbitals.



## 7. Orientations of protons of protonated S2B and S5A

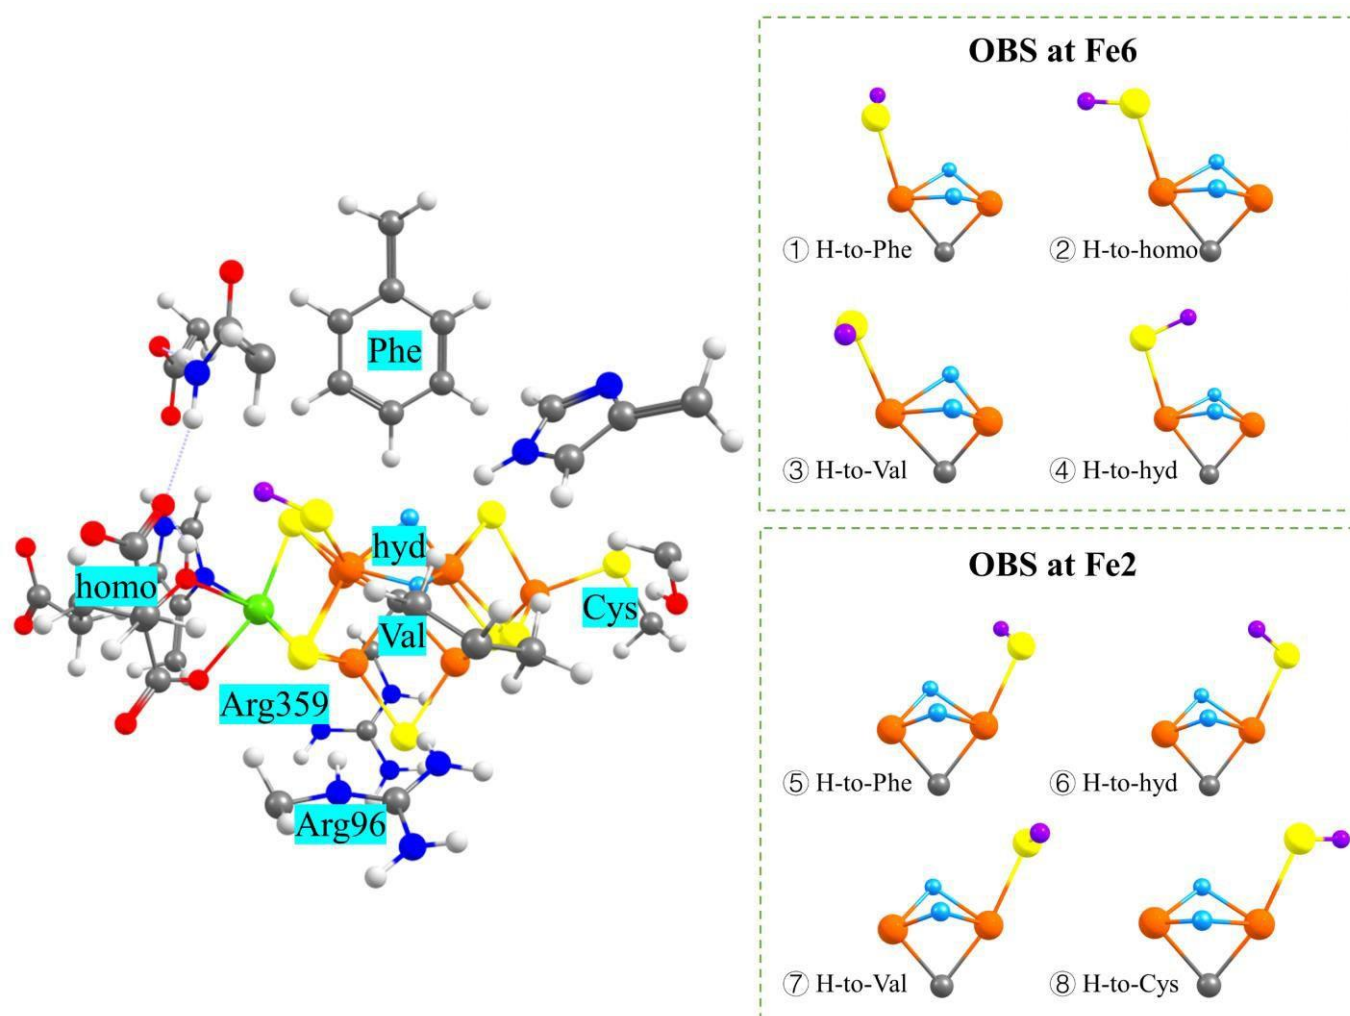

Figure S17. Different orientations of protons of either open or closed protonated belt sulfide-bridges. We use H-to-group to represent the orientation of the proton.

In this study, after optimizations of all states in spin states and 35 BS solutions for each model, the lowest-energy state was next used to explore all possible orientations of protons of either the closed or open protonated belt-sulfide bridges. The lowest-energy orientation was finally utilized in the study for obtaining results with the QM-C region (Results and Discussion section D) and was also used in the functional comparison (Results and Discussion section C).

If there is a terminal SH<sup>-</sup> on Fe2, the proton has four orientations: H-to-Phe, H-to-hyd, H-to-Val, and H-to-Cys, shown in Figure S17. When the terminal SH<sup>-</sup> is on Fe6, possible orientations of the proton are H-to-Phe, H-to-homo, H-to-Val, and H-to-hyd. In terms of a closed bridge at S2B (or S5A), proton orientations can be: H-to-Phe and H-to-Val (or H-to-Arg359 and H-to-Arg96).

Table S1. Relative energies of different orientations of the proton of an open bridge in **OBS<sub>6</sub>-2BH<sub>26</sub>** and **OBS<sub>2</sub>-2BH<sub>26</sub>** models (kcal/mol). All energies are relative to the lowest-energy model **OBS<sub>6</sub>-DH<sub>2</sub>** (see Figure 2k in the manuscript).

| (g) <b>OBS<sub>6</sub>-2BH<sub>26</sub></b> | $\Delta E(\text{polarized QM energy})$ | $\Delta E(\text{MM energy})$ | $\Delta E(\text{QM/MM})$ |
|---------------------------------------------|----------------------------------------|------------------------------|--------------------------|
| H-to-homo                                   | -0.8                                   | 2.2                          | 1.3                      |
| H-to-hyd                                    | -0.1                                   | 1.7                          | 1.7                      |
| H-to-Phe                                    | converged to H-to-homo                 |                              |                          |
| H-to-Val                                    | converged to H-to-hyd                  |                              |                          |
|                                             |                                        |                              |                          |
| (h) <b>OBS<sub>2</sub>-2BH<sub>26</sub></b> | $\Delta E(\text{polarized QM energy})$ | $\Delta E(\text{MM energy})$ | $\Delta E(\text{QM/MM})$ |

|          |                       |     |      |
|----------|-----------------------|-----|------|
| H-to-Val | 11.4                  | 1.9 | 13.3 |
| H-to-Cys | 12.7                  | 1.4 | 14.2 |
| H-to-Phe | converged to H-to-Cys |     |      |
| H-to-hyd | converged to H-to-Val |     |      |

Note: The spin states and BS solutions of **OBS<sub>6</sub>-2BH<sub>26</sub>** and **OBS<sub>2</sub>-2BH<sub>26</sub>** are BS347 ( $M_S = 1$ ) and BS2356 ( $M_S = 0$ ), respectively, which were calculated using QM-A region and r<sup>2</sup>SCAN.

The lowest-energy orientation of the proton of an open belt-sulfide bridge at Fe2 in **OBS<sub>2</sub>-2BH<sub>26</sub>**, **OBS<sub>2</sub>-2BH<sub>26</sub>-TH<sub>6</sub>** and **OBS<sub>2</sub>-DH<sub>6</sub>** models are H-to-Val, H-to-Cys, and H-to-Cys, respectively, shown in Table S1 to Table S3. If the proton at Fe6 in **OBS<sub>6</sub>-2BH<sub>26</sub>**, **OBS<sub>6</sub>-BH<sub>26</sub>-TH<sub>2</sub>**, and **OBS<sub>6</sub>-DH<sub>2</sub>** models, the lowest-energy orientations are H-to-homo, H-to-hyd, and H-to-homo, respectively, shown in Table S1 to Table S3.

Table S2. Results of different orientations of the proton of an open belt sulfide-bridge in **OBS<sub>2</sub>-2BH<sub>26</sub>-TH<sub>6</sub>** and **OBS<sub>6</sub>-BH<sub>26</sub>-TH<sub>2</sub>** models (kcal/mol). All energies are relative to the lowest-energy model **OBS<sub>6</sub>-DH<sub>2</sub>** (see Figure 2k in the manuscript).

| (j) <b>OBS<sub>2</sub>-BH<sub>26</sub>-TH<sub>6</sub></b> | $\Delta E(\text{polarized QM energy})$ | $\Delta E(\text{MM energy})$ | $\Delta E(\text{QM/MM})$ |
|-----------------------------------------------------------|----------------------------------------|------------------------------|--------------------------|
| H-to-Val                                                  | converged to H-to-hyd                  |                              |                          |
| H-to-Cys                                                  | 9.6                                    | 4.0                          | 13.6                     |
| H-to-Phe                                                  | 14.5                                   | 2.7                          | 17.2                     |
| H-to-hyd                                                  | 10.5                                   | 3.5                          | 14.0                     |
| <b>(i) OBS<sub>6</sub>-BH<sub>26</sub>-TH<sub>2</sub></b> |                                        |                              |                          |
| H-to-homo                                                 | -0.9                                   | 2.1                          | 1.2                      |
| H-to-hyd                                                  | -2.2                                   | 2.5                          | 0.2                      |
| H-to-Phe                                                  | converged to H-to-hyd                  |                              |                          |
| H-to-Val                                                  | converged to H-to-hyd                  |                              |                          |

Note: The spin states and BS solutions of **OBS<sub>2</sub>-BH<sub>26</sub>-TH<sub>6</sub>** and **OBS<sub>6</sub>-BH<sub>26</sub>-TH<sub>2</sub>** are BS147 ( $M_S = 1$ ) and BS235 ( $M_S = 2$ ), respectively, which were calculated using QM-A region and r<sup>2</sup>SCAN.

Table S3. Results of different orientations of the proton of an open belt sulfide-bridge in **OBS<sub>2</sub>-DH<sub>6</sub>** and **OBS<sub>6</sub>-DH<sub>2</sub>** models (kcal/mol). All energies are relative to the lowest-energy model **OBS<sub>6</sub>-DH<sub>2</sub>** (see Figure 2k in the manuscript).

| (l) <b>OBS<sub>2</sub>-DH<sub>6</sub></b> | $\Delta E(\text{polarized QM energy})$ | $\Delta E(\text{MM energy})$ | $\Delta E(\text{QM/MM})$ |
|-------------------------------------------|----------------------------------------|------------------------------|--------------------------|
| H-to-Val                                  | 1.3                                    | 6.3                          | 7.6                      |
| H-to-Cys                                  | -0.7                                   | 6.4                          | 5.7                      |
| H-to-Phe                                  | 3.8                                    | 5.3                          | 9.1                      |
| H-to-hyd                                  | converged to H-to-Val                  |                              |                          |
| <b>(k) OBS<sub>6</sub>-DH<sub>2</sub></b> |                                        |                              |                          |
| H-to-homo                                 | 0.0                                    | 0.0                          | 0.0                      |
| H-to-hyd                                  | converged to H-to-Val                  |                              |                          |
| H-to-Phe                                  | -1.0                                   | 1.4                          | 0.4                      |
| H-to-Val                                  | 0.4                                    | 1.3                          | 1.7                      |

Note: The spin states and BS solutions of **OBS<sub>2</sub>-DH<sub>6</sub>** and **OBS<sub>6</sub>-DH<sub>2</sub>** are BS346 ( $M_S = 2$ ) and BS147 ( $M_S = 1$ ), respectively, which were calculated using QM-A region and r<sup>2</sup>SCAN.

Table S4 shows the relative energies of two protons on both an open belt sulfide-bridge (S2B) at Fe2 or Fe6 and a closed belt sulfide-bridge (S5A) in different orientations in **CBS<sub>37</sub>-OBS<sub>2</sub>-BH<sub>26</sub>** and **CBS<sub>37</sub>-OBS<sub>6</sub>-BH<sub>26</sub>** models. The lowest-energy orientation of **CBS<sub>37</sub>-OBS<sub>2</sub>-BH<sub>26</sub>** and **CBS<sub>37</sub>-OBS<sub>6</sub>-BH<sub>26</sub>** models are H<sub>S2B</sub>-to-Cys-H<sub>S5A</sub>-to-Arg359 and H<sub>S2B</sub>-to-homo-H<sub>S5A</sub>-to-Arg96, respectively.

Table S4. Results of different orientations of the proton of an open and a closed belt sulfide-bridge in **CBS<sub>37</sub>-OBS<sub>2</sub>-BH<sub>26</sub>** and **CBS<sub>37</sub>-OBS<sub>6</sub>-BH<sub>26</sub>** models (kcal/mol). All energies are relative to the lowest-energy model **OBS<sub>6</sub>-DH<sub>2</sub>** (see Figure 2k in the manuscript).

| (m) <b>CBS<sub>37</sub>-OBS<sub>2</sub>-BH<sub>26</sub></b> | $\Delta E$ (polarized QM energy)                                  | $\Delta E$ (MM energy) | $\Delta E$ (QM/MM) |
|-------------------------------------------------------------|-------------------------------------------------------------------|------------------------|--------------------|
| H <sub>S2B</sub> -to-Cys-H <sub>S5A</sub> -to-Arg359        | 21.9                                                              | 2.8                    | 24.7               |
| H <sub>S2B</sub> -to-hyd-H <sub>S5A</sub> -to-Arg359        | 27.1                                                              | 0.0                    | 27.1               |
| H <sub>S2B</sub> -to-Phe-H <sub>S5A</sub> -to-Arg359        | converged to H <sub>S2B</sub> -to-hyd-H <sub>S5A</sub> -to-Arg359 |                        |                    |
| H <sub>S2B</sub> -to-Val-H <sub>S5A</sub> -to-Arg359        | converged to H <sub>S2B</sub> -to-Cys-H <sub>S5A</sub> -to-Arg359 |                        |                    |
| H <sub>S2B</sub> -to-Cys-H <sub>S5A</sub> -to-Arg96         | 20.5                                                              | 4.4                    | 25.0               |
| H <sub>S2B</sub> -to-hyd-H <sub>S5A</sub> -to-Arg96         | 22.0                                                              | 5.3                    | 27.3               |
| H <sub>S2B</sub> -to-Phe-H <sub>S5A</sub> -to-Arg96         | converged to H <sub>S2B</sub> -to-hyd-H <sub>S5A</sub> -to-Arg96  |                        |                    |
| H <sub>S2B</sub> -to-Val-H <sub>S5A</sub> -to-Arg96         | converged to H <sub>S2B</sub> -to-Cys-H <sub>S5A</sub> -to-Arg96  |                        |                    |
|                                                             |                                                                   |                        |                    |
| (n) <b>CBS<sub>37</sub>-OBS<sub>6</sub>-BH<sub>26</sub></b> |                                                                   |                        |                    |
| H <sub>S2B</sub> -to-homo-H <sub>S5A</sub> -to-Arg359       | 7.5                                                               | 5.8                    | 13.4               |
| H <sub>S2B</sub> -to-hyd-H <sub>S5A</sub> -to-Arg359        | 7.9                                                               | 5.7                    | 13.5               |
| H <sub>S2B</sub> -to-Phe-H <sub>S5A</sub> -to-Arg359        | converged to H <sub>S2B</sub> -to-hyd-H <sub>S5A</sub> -to-Arg359 |                        |                    |
| H <sub>S2B</sub> -to-Val-H <sub>S5A</sub> -to-Arg359        | converged to H <sub>S2B</sub> -to-hyd-H <sub>S5A</sub> -to-Arg359 |                        |                    |
| H <sub>S2B</sub> -to-homo-H <sub>S5A</sub> -to-Arg96        | 6.9                                                               | 6.1                    | 13.1               |
| H <sub>S2B</sub> -to-hyd-H <sub>S5A</sub> -to-Arg96         | 7.3                                                               | 6.0                    | 13.2               |
| H <sub>S2B</sub> -to-Phe-H <sub>S5A</sub> -to-Arg96         | converged to H <sub>S2B</sub> -to-hyd-H <sub>S5A</sub> -to-Arg96  |                        |                    |
| H <sub>S2B</sub> -to-Val-H <sub>S5A</sub> -to-Arg96         | converged to H <sub>S2B</sub> -to-hyd-H <sub>S5A</sub> -to-Arg96  |                        |                    |

Note: The spin states and BS solutions of **CBS<sub>37</sub>-OBS<sub>2</sub>-BH<sub>26</sub>** and **CBS<sub>37</sub>-OBS<sub>6</sub>-BH<sub>26</sub>** are BS147 ( $M_S = 1$ ) and BS247 ( $M_S = 2$ ), respectively, which were calculated using QM-A region and r<sup>2</sup>SCAN.

The relative energies of two protons on both closed hydrogenated S2B (between Fe2 and Fe6) and S5A (between Fe3 and Fe7) in **2CBS<sub>26,37</sub>-BH<sub>26(5)</sub>**, **2CBS<sub>26,37</sub>-BH<sub>26(3)</sub>**, and **2CBS<sub>26,37</sub>-BH<sub>37</sub>** models are shown in Table S5 to Table S7. The lowest-energy orientations of these three models are H<sub>S2B</sub>-to-Phe-H<sub>S5A</sub>-to-Arg359, H<sub>S2B</sub>-to-Val-H<sub>S5A</sub>-to-Arg359, and H<sub>S2B</sub>-to-Phe-H<sub>S5A</sub>-to-Arg359, respectively.

Because the energies of **CBS<sub>26</sub>-2BH<sub>26(5),37</sub>**, **CBS<sub>26</sub>-2BH<sub>26(3),37</sub>**, **CBS<sub>37</sub>-2BH<sub>26(5),37</sub>**, and **CBS<sub>37</sub>-2BH<sub>26(3),37</sub>** models are much higher than the lowest model **OBS<sub>6</sub>-DH<sub>2</sub>** (see Figure 2k in the manuscript), we did not investigate the orientations of protons at a closed belt sulfide-bridge (S2B or S5A). Different orientations of protons at the closed belt sulfide-bridge (S2B) of models **CBS<sub>26</sub>-BH<sub>26</sub>-TH<sub>5</sub>**, **CBS<sub>26</sub>-2TH<sub>4,5</sub>** and **C3H** have been investigated in the previous paper<sup>5</sup>.

Table S5. Results of different orientations of the proton of two closed belt sulfide-bridges in **2CBS<sub>26,37</sub>-BH<sub>26(5)</sub>** models (kcal/mol). All energies are relative to the lowest-energy model **OBS<sub>6</sub>-DH<sub>2</sub>** (see Figure 2k in the manuscript).

| (o) <b>2CBS<sub>26,37</sub>-BH<sub>26(5)</sub></b>   | $\Delta E$ (polarized QM energy) | $\Delta E$ (MM energy) | $\Delta E$ (QM/MM) |
|------------------------------------------------------|----------------------------------|------------------------|--------------------|
| H <sub>S2B</sub> -to-Phe-H <sub>S5A</sub> -to-Arg359 | 16.3                             | 4.0                    | 20.3               |

|                                                      |      |     |      |
|------------------------------------------------------|------|-----|------|
| H <sub>S2B</sub> -to-Phe-H <sub>S5A</sub> -to-Arg96  | 16.4 | 4.6 | 21.0 |
| H <sub>S2B</sub> -to-Val-H <sub>S5A</sub> -to-Arg359 | 21.6 | 3.2 | 24.8 |
| H <sub>S2B</sub> -to-Val-H <sub>S5A</sub> -to-Arg96  | 21.7 | 3.8 | 25.5 |

Note: The spin state and BS solution of **2CBS<sub>26,37</sub>-BH<sub>26(5)</sub>** are BS14 and M<sub>S</sub> = 2, respectively (using QM-A region and r<sup>2</sup>SCAN).

Table S6. Results of different orientations of the proton of two closed sulfide-bridges in **2CBS<sub>26,37</sub>-BH<sub>26(3)</sub>** models (kcal/mol). All energies are relative to the lowest-energy model **OBS<sub>6</sub>-DH<sub>2</sub>** (see Figure 2k in the manuscript).

| (p) <b>2CBS<sub>26,37</sub>-BH<sub>26(3)</sub></b>   | ΔE(polarized QM energy) | ΔE(MM energy) | ΔE(QM/MM) |
|------------------------------------------------------|-------------------------|---------------|-----------|
| H <sub>S2B</sub> -to-Phe-H <sub>S5A</sub> -to-Arg359 | 9.9                     | 11.5          | 21.4      |
| H <sub>S2B</sub> -to-Phe-H <sub>S5A</sub> -to-Arg96  | 11.9                    | 10.1          | 22.0      |
| H <sub>S2B</sub> -to-Val-H <sub>S5A</sub> -to-Arg359 | 8.6                     | 9.9           | 18.4      |
| H <sub>S2B</sub> -to-Val-H <sub>S5A</sub> -to-Arg96  | 9.5                     | 9.8           | 19.3      |

Note: The spin state and BS solution of **2CBS<sub>26,37</sub>-BH<sub>26(3)</sub>** are BS14 and M<sub>S</sub> = 2, respectively (using QM-A region and r<sup>2</sup>SCAN).

Table S7. Results of different orientations of the proton of two closed sulfide-bridges in **2CBS<sub>26,37</sub>-BH<sub>37</sub>** models (kcal/mol). All energies are relative to the lowest-energy model **OBS<sub>6</sub>-DH<sub>2</sub>** (see Figure 2k in the manuscript).

| (q) <b>2CBS<sub>26,37</sub>-BH<sub>37</sub></b>      | ΔE(polarized QM energy) | ΔE(MM energy) | ΔE(QM/MM) |
|------------------------------------------------------|-------------------------|---------------|-----------|
| H <sub>S2B</sub> -to-Phe-H <sub>S5A</sub> -to-Arg359 | 3.6                     | 6.8           | 10.5      |
| H <sub>S2B</sub> -to-Phe-H <sub>S5A</sub> -to-Arg96  | 6.6                     | 8.2           | 14.8      |
| H <sub>S2B</sub> -to-Val-H <sub>S5A</sub> -to-Arg359 | 8.8                     | 6.8           | 15.6      |
| H <sub>S2B</sub> -to-Val-H <sub>S5A</sub> -to-Arg96  | 5.6                     | 5.5           | 11.1      |

Note: The spin state and BS solution of **2CBS<sub>26,37</sub>-BH<sub>37</sub>** are BS346 and M<sub>S</sub> = 2, respectively (using QM-A region and r<sup>2</sup>SCAN).

## 8. Additional information on spin-state and BS-state energies

Figure S18 shows the energy difference between the three spin states for  $E_3$  isomers **e** to **q** (see Figure 2), and the lowest energy BS state for each  $M_S$  state is plotted. The difference between different spin states for each isomer can be fairly large, especially for isomers **k** and **l**.

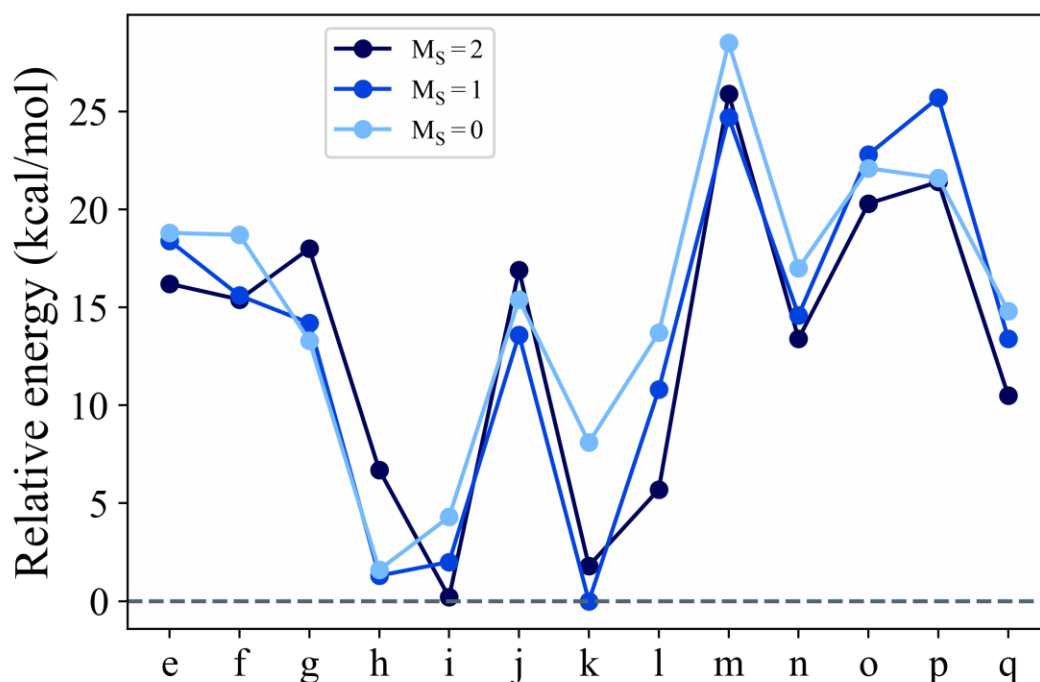

Figure S18. The spin-state energies for isomers **e-q** according to QM/MM calculations using QM-region A and  $r^2$ SCAN. The lowest-energy BS-state for each spin-state is used. The BS solutions of **e-q** models were shown in section 12.

For every spin-state of each isomer we systematically attempted spin-flipping of 3 Fe ions to find 35 different broken-symmetry states. Some calculations converged, however, to states with either 2 or 4 spin-down Fe ions. A state with only 2 spin-down Fe ions represents an alternative BS state that is typically not included in the BS-state problem of FeMoco, as such a state should generally be high in energy due to a lack of pairwise antiferromagnetic interactions (antiferromagnetic coupling is highly stabilizing). A BS-state with 4 spin-down Fe ions instead, however, should typically represent a mirror image of a BS-state with 3 spin-down Fe ions as whether a local-spin is spin-up or spin-down is arbitrary. This is complicated by the fact, however, that FeMoco is a mixed-valent system and the minority-spin electrons (typically between pairs of Fe ions) can delocalize in multiple ways or localize on different Fe ions. This means that there are actually even more SCF states and the “mirror-image states” do not have to have the same energy.

As an example: The BS2567 state was found when attempting to find BS256 for the  $2\text{CBS}_{26,37}\text{-BH}_{26(5)}$  ( $M_S = 0$ ) isomer. BS2567 and BS134 should be mirror-images, and as shown in Table S8, they have identical energies and Mulliken spin populations.

Table S8. The Mulliken spin populations of BS2567 and BS134 of  $2\text{CBS}_{26,37}\text{-BH}_{26(5)}$  with  $M_S = 0$ .

|        | $\Delta E(\text{polarized QM})$ | $\Delta E(\text{QM/MM})$ | Mo    | Fe1   | Fe2   | Fe3   | Fe4   | Fe5   | Fe6   | Fe7   |
|--------|---------------------------------|--------------------------|-------|-------|-------|-------|-------|-------|-------|-------|
| BS2567 | 19.3                            | 22.1                     | 1.28  | 3.32  | -3.17 | 3.02  | 3.17  | -3.01 | -2.14 | -2.81 |
| BS134  | 19.0                            | 22.1                     | -1.29 | -3.32 | 3.17  | -3.01 | -3.18 | 3.01  | 2.16  | 2.82  |

Note: The results in this table were calculated using QM-A region and  $r^2$ SCAN.



However, for the case of BS2567 and BS134 solutions for isomer **OBS<sub>2</sub>-2BH<sub>26</sub>-N<sub>2</sub>@Fe6-M<sub>S</sub>=1** (Figure S15), shown in Table S9, they have considerably different energies and Mulliken spin populations, suggesting that while the basic spin topology is the same, the states likely differ with respect to localization/delocalization degree of the minority-spin electrons.

Table S9. The Mulliken spin populations of BS2567 and BS134 of **OBS<sub>2</sub>-2BH<sub>26</sub>-N<sub>2</sub>@Fe6** with M<sub>S</sub> = 1.

|        | $\Delta E(\text{polarized QM})$ | $\Delta E(\text{QM/MM})$ | Mo    | Fe1   | Fe2   | Fe3   | Fe4   | Fe5   | Fe6   | Fe7   |
|--------|---------------------------------|--------------------------|-------|-------|-------|-------|-------|-------|-------|-------|
| BS2567 | 20.5                            | 19.4                     | -0.96 | -2.83 | 3.24  | -1.87 | -2.91 | 3.12  | 0.83  | 3.02  |
| BS134  | 10.3                            | 10.7                     | 0.82  | 3.29  | -3.03 | 3.22  | 3.16  | -2.77 | -0.58 | -2.56 |

Note: The results in this table were calculated using QM-A region and r<sup>2</sup>SCAN.

The 35 different BS solutions can be grouped into 10 BS classes according to analysis made popular by Noodleman. In order to understand the general stability of different BS solutions of the **E<sub>3</sub>** isomers we have grouped the 3 lowest energy BS solutions for each isomer and spin-state into which of the 10 BS classes it belongs to as shown in Table S10. We note that for the cases where the spin-flipping resulted in low-energy BS states with 4 spin-down Fe ions was, the state was grouped according to its mirror image BS if their energy difference was small, for example, if BS2356 and BS147 have a very small energy difference (< 0.5 kcal/mol) or even the same, the BS2356 was grouped into BS10 (as its mirror-image BS147). However, for the case of where BS2356 and BS147 had larger energy difference (and different electronic structure) we labelled it as BS2356 in the table.

The results in Table S8 overall reveal that the most stable BS states for **E<sub>3</sub>** isomers belong to the BS7, BS8 and BS10 class (and to a lesser extent BS6 and BS9).

Table S10. The classification of the three lowest-energy BS states (lower than 5 kcal/mol) of each spin state and each isomer into the 10 common BS classes and selected unusual BS states.

|                                                          |                      | $\Delta E_{\text{max}}^a$ | BS1 | BS2 | BS3 | BS4 | BS5 | BS6 | BS7 | BS8 | BS9 | BS10           | BS2356 | BS3456 | BS13 | BS14 |
|----------------------------------------------------------|----------------------|---------------------------|-----|-----|-----|-----|-----|-----|-----|-----|-----|----------------|--------|--------|------|------|
| <b>a: CBS<sub>26</sub>-2BH<sub>26(5),37</sub></b>        | (M <sub>S</sub> = 1) | 0.8 <sup>b</sup>          |     |     |     |     |     |     | ■   | ■   | ■   |                |        |        |      |      |
|                                                          | (M <sub>S</sub> = 1) | 4.9                       |     |     |     |     |     |     | ■   | ■   | ◆   | ■ <sup>c</sup> |        |        |      |      |
|                                                          | (M <sub>S</sub> = 1) | 3.9                       |     |     |     |     |     | ■   | ■   | ■   |     |                |        |        |      |      |
| <b>c: CBS<sub>37</sub>-2BH<sub>26(5),37</sub></b>        | (M <sub>S</sub> = 1) | 2.5                       |     |     |     |     |     |     | ■   | ■   | ■   |                |        |        |      |      |
|                                                          | (M <sub>S</sub> = 2) | 1.6                       |     |     |     |     |     |     | ■   | ■   |     |                |        |        | ■    |      |
|                                                          | (M <sub>S</sub> = 1) | 4.0                       |     |     |     |     |     | ■   | ■   |     |     | ■              |        |        |      |      |
| <b>d: CBS<sub>37</sub>-2BH<sub>26(3),37</sub></b>        | (M <sub>S</sub> = 0) | 3.4                       |     |     |     |     |     |     | ■   | ■   | ■   |                |        |        |      |      |
|                                                          | (M <sub>S</sub> = 2) | 3.0                       |     |     |     |     |     |     | ■   | ■   |     |                |        |        |      |      |
|                                                          | (M <sub>S</sub> = 1) | 2.4                       |     | ■   |     |     |     | ■   | ■   | ■   |     |                |        |        |      |      |
| <b>f: CBS<sub>26</sub>-2TH<sub>4,5</sub></b>             | (M <sub>S</sub> = 0) | 2.1                       |     | ■   |     |     |     |     |     |     |     | ■              |        | ■      |      |      |
|                                                          | (M <sub>S</sub> = 2) | 1.4                       |     |     |     |     |     |     | ■   | ■   |     |                |        |        | ■    | ■    |
|                                                          | (M <sub>S</sub> = 1) | 3.0                       |     |     |     |     |     |     | ■   | ■   |     | ■              |        |        |      |      |
| <b>g: OBS<sub>6</sub>-2BH<sub>26</sub></b>               | (M <sub>S</sub> = 0) | 3.3                       |     |     |     |     |     | ■   |     |     |     | ■              | ■      |        |      |      |
|                                                          | (M <sub>S</sub> = 2) | 3.0                       |     |     |     |     |     |     | ■   | ■   | ■   |                |        |        |      |      |
|                                                          | (M <sub>S</sub> = 1) | 1.3                       |     |     |     |     |     |     | ■   | ■   |     | ■              | ■      |        |      |      |
| <b>h: OBS<sub>2</sub>-2BH<sub>26</sub></b>               | (M <sub>S</sub> = 0) | 1.3                       |     |     |     |     |     |     | ■   | ■   |     | ■              | ■      |        |      |      |
|                                                          | (M <sub>S</sub> = 2) | 4.3                       |     |     |     |     |     |     | ■   | ■   |     |                |        |        |      |      |
|                                                          | (M <sub>S</sub> = 1) | 0.5                       |     |     |     |     |     | ■   | ■   |     |     | ■              | ■      |        |      |      |
| <b>i: OBS<sub>6</sub>-BH<sub>26</sub>-TH<sub>2</sub></b> | (M <sub>S</sub> = 0) | 2.8                       |     |     |     |     |     | ■   |     |     |     | ■              | ■      |        |      |      |

|                                                                       |                      |                |  |   |   |   |   |   |   |   |   |   |   |   |   |   |  |   |
|-----------------------------------------------------------------------|----------------------|----------------|--|---|---|---|---|---|---|---|---|---|---|---|---|---|--|---|
| <b>j: OBS<sub>2</sub>-BH<sub>26</sub>-TH<sub>6</sub></b>              | (M <sub>S</sub> = 2) | 2.6            |  |   |   |   |   | ■ | ■ | ■ |   |   |   |   |   |   |  |   |
|                                                                       | (M <sub>S</sub> = 1) | 1.3            |  |   |   |   |   |   | ■ | ■ |   |   | ■ |   |   |   |  |   |
|                                                                       | (M <sub>S</sub> = 0) | 0.9            |  |   |   |   |   |   |   | ■ | ■ |   | ■ |   | ■ |   |  |   |
| <b>k: OBS<sub>6</sub>-DH<sub>2</sub></b>                              | (M <sub>S</sub> = 2) | 0.5            |  |   |   |   |   |   | ■ | ■ | ■ |   |   |   |   |   |  |   |
|                                                                       | (M <sub>S</sub> = 1) | 1.6            |  |   |   |   |   |   |   | ■ | ■ |   | ■ | ■ |   |   |  |   |
|                                                                       | (M <sub>S</sub> = 0) | 0.4            |  |   |   | ■ |   | ■ |   |   |   |   | ■ |   |   |   |  |   |
| <b>l: OBS<sub>2</sub>-DH<sub>6</sub></b>                              | (M <sub>S</sub> = 2) | 0 <sup>d</sup> |  |   |   |   |   |   |   | ■ | ■ |   |   |   |   |   |  |   |
|                                                                       | (M <sub>S</sub> = 1) | 2.6            |  |   |   |   |   |   |   | ■ | ■ |   |   | ■ |   |   |  |   |
|                                                                       | (M <sub>S</sub> = 0) | 0.6            |  |   |   |   |   |   |   |   |   |   | ■ | ■ | ■ |   |  |   |
| <b>m: CBS<sub>37</sub>-OBS<sub>2</sub>-BH<sub>26</sub></b>            | (M <sub>S</sub> = 2) | 0.9            |  |   |   |   |   |   |   | ■ | ■ | ■ |   |   |   |   |  |   |
|                                                                       | (M <sub>S</sub> = 1) | 2.0            |  |   |   |   |   |   |   |   |   | ■ |   | ■ | ■ |   |  |   |
|                                                                       | (M <sub>S</sub> = 0) | 1.0            |  | ■ | ■ |   |   |   |   |   |   |   |   |   | ■ |   |  |   |
| <b>n: CBS<sub>37</sub>-OBS<sub>6</sub>-BH<sub>26</sub></b>            | (M <sub>S</sub> = 2) | 0.6            |  |   |   |   |   |   |   | ■ | ■ |   |   |   |   |   |  |   |
|                                                                       | (M <sub>S</sub> = 1) | 0.2            |  | ■ |   |   |   |   | ■ |   |   |   |   |   | ■ |   |  |   |
|                                                                       | (M <sub>S</sub> = 0) | 0.5            |  | ■ |   |   |   |   |   |   |   |   |   | ■ | ■ |   |  |   |
| <b>o: 2CBS<sub>26,37</sub>-BH<sub>26(5)</sub></b>                     | (M <sub>S</sub> = 2) | 1.6            |  |   |   |   |   |   |   |   |   | ■ | ■ |   |   |   |  | ■ |
|                                                                       | (M <sub>S</sub> = 1) | 0.1            |  |   |   |   |   |   | ■ |   |   |   | ■ | ■ |   |   |  |   |
|                                                                       | (M <sub>S</sub> = 0) | 2.8            |  |   | ■ |   |   |   |   |   |   | ■ | ■ |   |   |   |  |   |
| <b>p: 2CBS<sub>26,37</sub>-BH<sub>26(3)</sub></b>                     | (M <sub>S</sub> = 2) | 3.8            |  |   |   |   | ■ |   |   |   | ■ |   |   |   |   |   |  | ■ |
|                                                                       | (M <sub>S</sub> = 1) | 0.4            |  |   |   |   | ■ |   |   |   |   |   | ■ | ■ |   |   |  |   |
|                                                                       | (M <sub>S</sub> = 0) | 2.2            |  |   | ■ |   |   |   |   |   |   |   |   | ■ | ■ |   |  |   |
| <b>q: 2CBS<sub>26,37</sub>-BH<sub>37</sub></b>                        | (M <sub>S</sub> = 2) | 0.5            |  |   |   |   |   | ■ |   | ■ | ■ |   |   |   |   |   |  |   |
|                                                                       | (M <sub>S</sub> = 1) | 1.4            |  |   |   |   |   |   |   | ■ | ■ |   |   |   | ■ |   |  |   |
|                                                                       | (M <sub>S</sub> = 0) | 2.8            |  |   | ■ |   |   |   |   |   |   |   |   |   | ■ | ■ |  |   |
| <b>OBS<sub>2</sub>-2BH<sub>26</sub>-N<sub>2</sub>@Fe6<sup>e</sup></b> | (M <sub>S</sub> = 0) | 0.1            |  | ■ |   |   |   | ■ |   |   |   |   |   | ■ |   |   |  |   |
| <b>OBS<sub>6</sub>-2BH<sub>26</sub>-N<sub>2</sub>@Fe2<sup>e</sup></b> | (M <sub>S</sub> = 0) | 2.5            |  |   |   |   |   | ■ |   |   | ■ |   |   | ■ |   |   |  |   |

<sup>a</sup>The maximum energy difference between three selected BS states. <sup>b</sup>Only two states converged to the initial input structure (what we designed). <sup>c</sup>Two states belongs to the same BS class. <sup>d</sup>There is only one BS solution, because the second lowest-energy state is higher than the first lowest-energy state by 7.4 kcal/mol. <sup>e</sup>The three lowest-energy states for **OBS<sub>2</sub>-2BH<sub>26</sub>-N<sub>2</sub>@Fe6** and **OBS<sub>6</sub>-2BH<sub>26</sub>-N<sub>2</sub>@Fe2** are all M<sub>S</sub> = 0, so only the M<sub>S</sub> = 0 BS states are included. All results in this table were calculated using QM-A region and r<sup>2</sup>SCAN.

## 9. Additional results for different functionals

### Relative energies with different functionals

Figure S19 shows additional results related to the functional dependency presented in section C of the manuscript. TPSSh, B97-D3, and  $r^2$ SCAN give very similar trend for all isomers, and **g**, **i**, and **k** are found to be three lowest energy isomers.

B3LYP\*, B3LYP, and TPSS give results quite different from the other three functionals. The **g** and **i** isomers are also lower-energy isomers when using TPSS; however, the **k** isomer is higher than **g** and **i** by about 8 kcal/mol and also less stable than **f**. B3LYP\* favors **r** containing a triply protonated carbide ion, which is a little lower than **g**, **i**, and **k** isomers. The energy difference between **g**, **i**, and **k** isomers when using B3LYP\* is larger than TPSSh, B97-D3, and  $r^2$ SCAN, and **k** with H<sub>2</sub> bound to Fe<sub>2</sub> is more stable than **g** and **i**. B3LYP has a similar trend to B3LYP\* but the energy difference between **r** and other isomers is much larger than B3LYP\*. As discussed in previous studies<sup>6</sup> from our group TPSSh, B97-D3, B3LYP\* and  $r^2$ SCAN are known to describe Fe-Fe/Mo-Fe distances of spin-coupled sulfide-bridged Fe-Fe/Mo-Fe dimers as well as FeMoco very similarly and better than both most regular GGA/meta-GGA functionals (like TPSS) and also common hybrid functionals (like B3LYP). However, B3LYP\* gives here a very different trend from TPSSh, B97-D3, and  $r^2$ SCAN for the energetics of the **E**<sub>3</sub> state. TPSS was previously shown to systematically underestimate Fe-Fe/Mo-Fe distances and this was found to correlate with a tendency to overestimate covalency in the bridging Fe-S bonds<sup>6</sup>.

The B3LYP and B3LYP\* functionals favor the **C3H E**<sub>3</sub> model (**r**), however, there is no experimental evidence that suggests reduced FeMoco states with a protonated carbide are ever formed. According to recent <sup>13</sup>C ENDOR measurements of multiple trapped FeMoco states, the carbide hyperfine coupling is practically unchanged, suggesting an unchanged carbide environment.

In a recent study, both TPSSh and B3LYP were found to favor the **C3H** isomer<sup>4</sup>, but in this work we find that **C3H** is higher than isomer **k** by 25.1 kcal/mol (0.9 kcal/mol in that study<sup>4</sup>) when using TPSSh. The reason for this difference is most likely the basis set, we have in this work consistently used an all-electron scalar relativistic treatment with a large ZORA-def2-TZVP on the cofactor while a much smaller basis, def2-SV(P) basis set was utilized in the previous study without scalar relativistic effects included<sup>4</sup>. The spin state and BS solution of this model used in the previous study are  $M_S = 1$  and BS136<sup>4</sup>. We explored this model in three spin states and 6 BS solutions belonging to BS10 class, and found that the lowest-energy isomer has  $M_S = 1$  and BS146, slightly lower than BS136 by 0.6 kcal/mol.

Finally, we note that the covalency of Fe-H bonds and the ability of DFT protocols to describe such bonds is an under-explored area and few studies have been dedicated to this topic. This is likely highly relevant in this context of **E**<sub>3</sub> isomers.

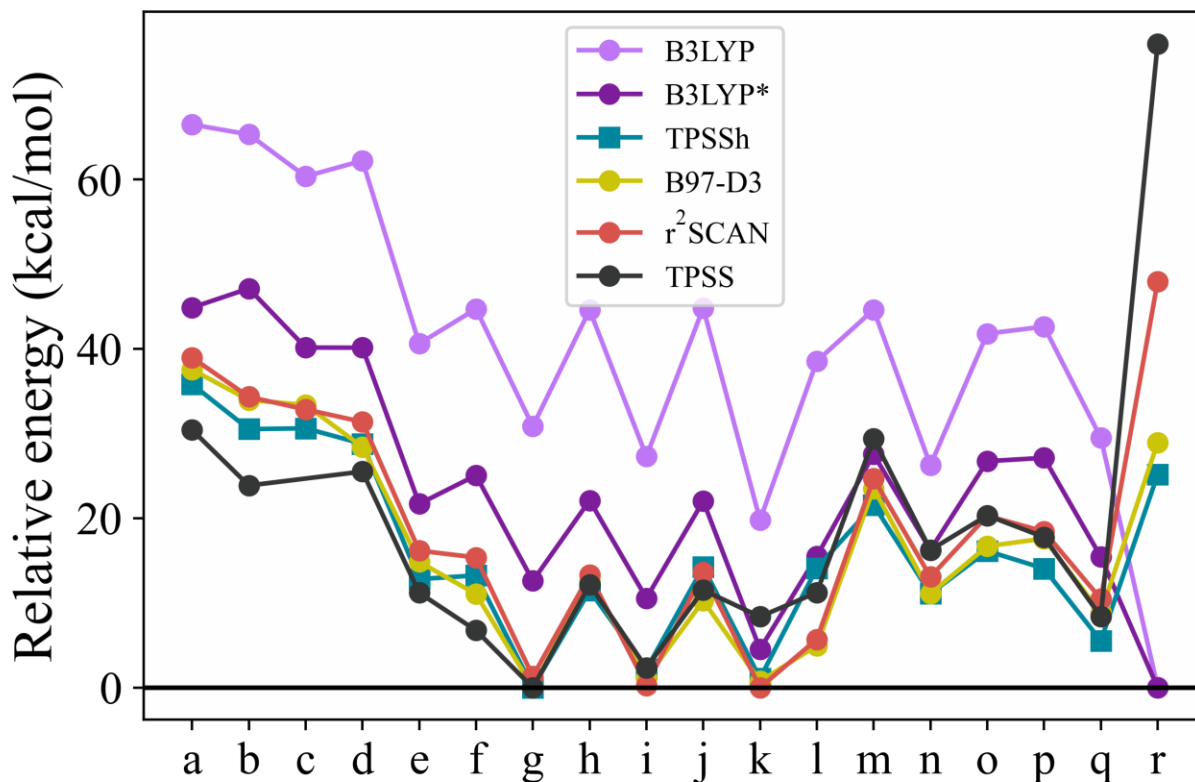

Figure S19. The comparison for isomers **a-r** between different functionals. The **c** isomer is missing for the TPSS functional, because three BS states of this isomer converge to other isomers with one terminal hydride on Fe2 (the distance of Fe2-hydride is longer than 2 Å), shown in Table S14 and Figure S9. The information about spin states and BS solutions of each model have been shown in Tables S12 to S28 of the SI.

#### Electronic structure analysis with different functionals

Figure S20 to Figure S25 shows electron configurations derived from localized orbital analysis as well as selected geometric parameters of each isomer **g**, **i** and **k** with TPSSh, B97-D3,  $r^2$ SCAN, B3LYP\*, and TPSS used in this study.

For the **g** (**OBS<sub>6</sub>-2BH<sub>26</sub>**) isomer (Figure S20), the common theme is that there are four electrons associated with the two bridging hydrides, but the difference is the degree of delocalization of these electrons to either Fe2 or Fe6. The  $r^2$ SCAN and B3LYP\* give similar electronic structures, two bridging hydrides share four electrons with Fe2, which is associated with shorter Fe2-hydride distances than Fe6-hydride (see Figure S21), and one electron has transferred from the Fe<sub>4</sub> sub-cubane to the hydrides compared to the **E<sub>0</sub>** state (see Figure S11). In contrast, there are four electrons delocalized between hydrides and Fe6 for TPSSh, which is correlated with shorter Fe6-hydride distances than Fe2-hydride distances, and one electron has transferred from the MoFe<sub>3</sub>-cubane to the hydrides. Interestingly, TPSS and B97-D3 give a trend in-between  $r^2$ SCAN, B3LYP\* and TPSSh, those four electrons are shared with both Fe2 and Fe6, correlating with similar distances between hydrides and Fe2/Fe6, but one electron has transferred from MoFe<sub>3</sub> sub-cubane to hydrides and Fe2 and Fe6 share one electron. We also note that part of the trends seen may be related to different BS solutions preferred by different functionals.

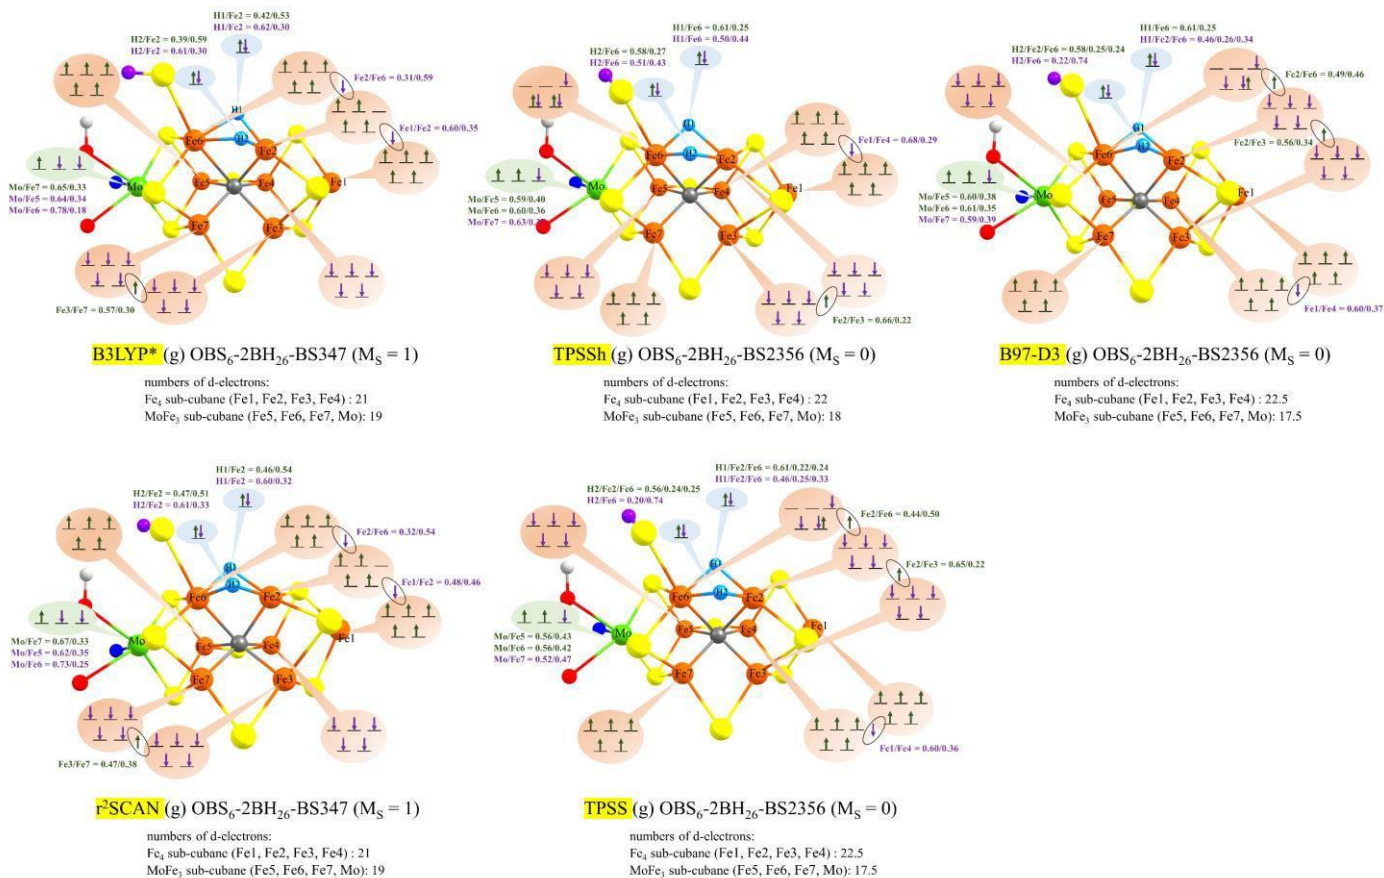

Figure S20. The comparison of electronic configurations for isomer **g** between different functionals. The green and purple numbers are localized orbital populations. The configurations of *r*<sup>2</sup>SCAN and other functionals were calculated using the QM-C and QM-A regions, respectively. Our previous paper show that the geometric and electronic structure differences between the QM-A and QM-C region are minor<sup>3</sup>.

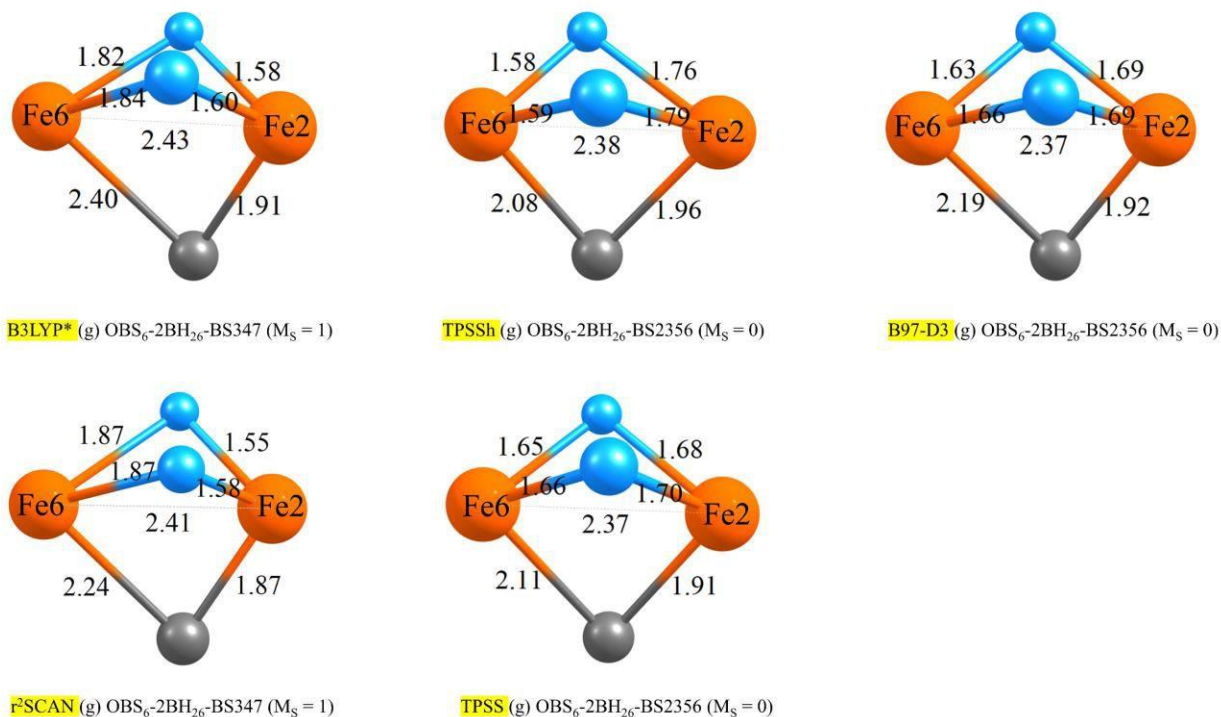



Figure S21. The comparison of key distances for isomer **g** with different functionals. The geometries of  $r^2$ SCAN and other functionals were calculated using the QM-C and QM-A regions, respectively. Our previous paper show that the geometric and electronic structure differences between the QM-A and QM-C region are minor<sup>3</sup>.

For isomer **i** (**OBS<sub>6</sub>-BH<sub>26</sub>-TH<sub>2</sub>**), the molecular and electronic structure is overall quite similar for the five functionals in that the terminal hydride has 2 electrons associated with it (shared to different extent between H and Fe2), and the bridging hydride shares electrons with both Fe2 and Fe6, and the distances of Fe2/Fe6-hydrides are similar with differences, as shown in Figure S22 and Figure S23. There are some differences, however, associated with Fe2 vs Fe6 vs. H contribution to the bridging hydride and TPSS differs in that an electron from the MoFe<sub>3</sub> sub-cubane is donated to the hydrides while for the other functionals an Fe<sub>4</sub> sub-cubane electron has been donated. Also B3LYP\* prefers localizing the minority-spin electrons while the others show more mixed-valence delocalization.

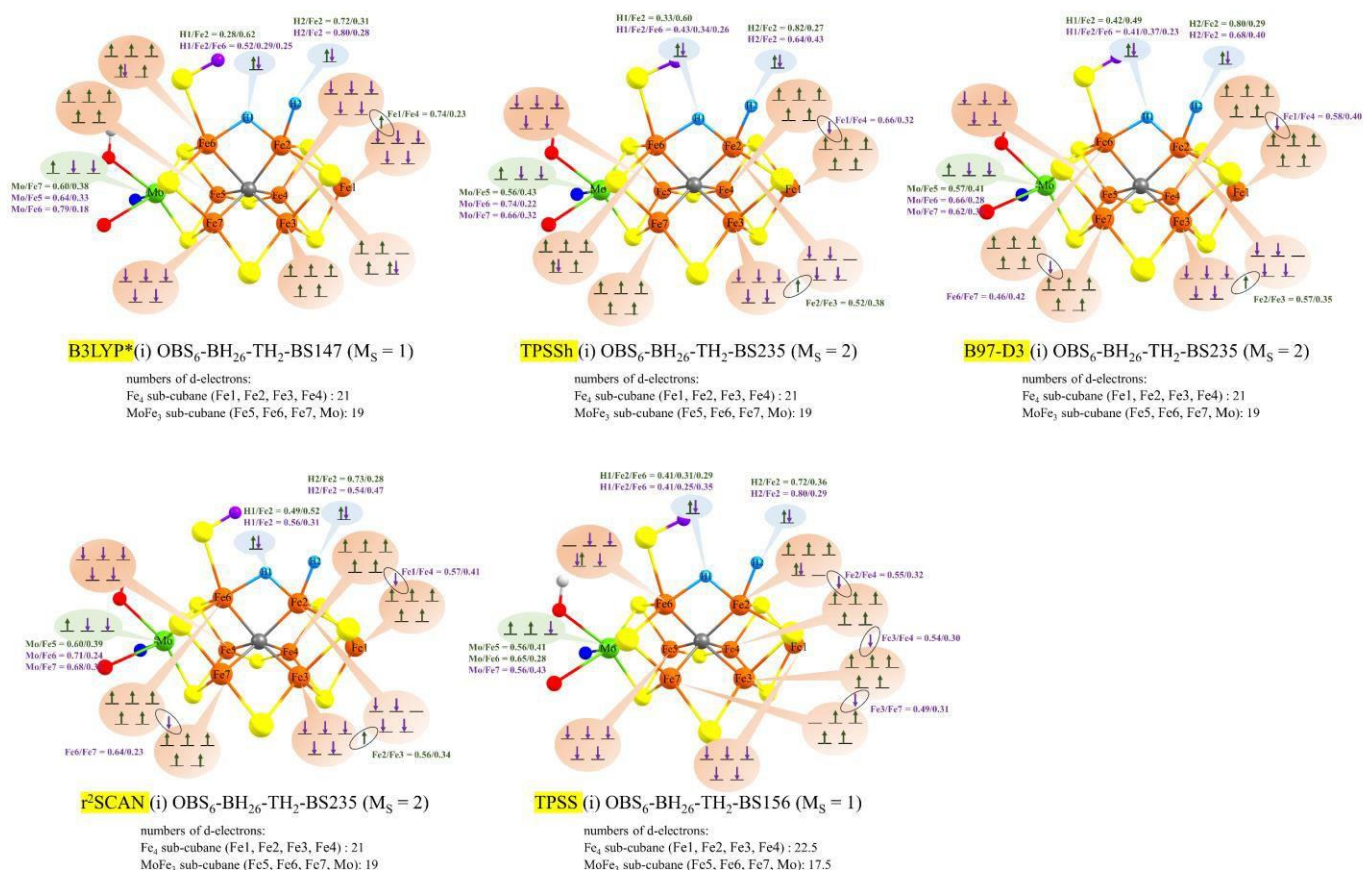

Figure S22. The comparison of electronic configurations for isomer **i** between different functionals. The green and purple numbers are localized orbital populations. The configurations of  $r^2$ SCAN and other functionals were calculated using the QM-C and QM-A regions, respectively. Our previous paper show that the geometric and electronic structure differences between QM-A and QM-C regions are minor<sup>3</sup>.

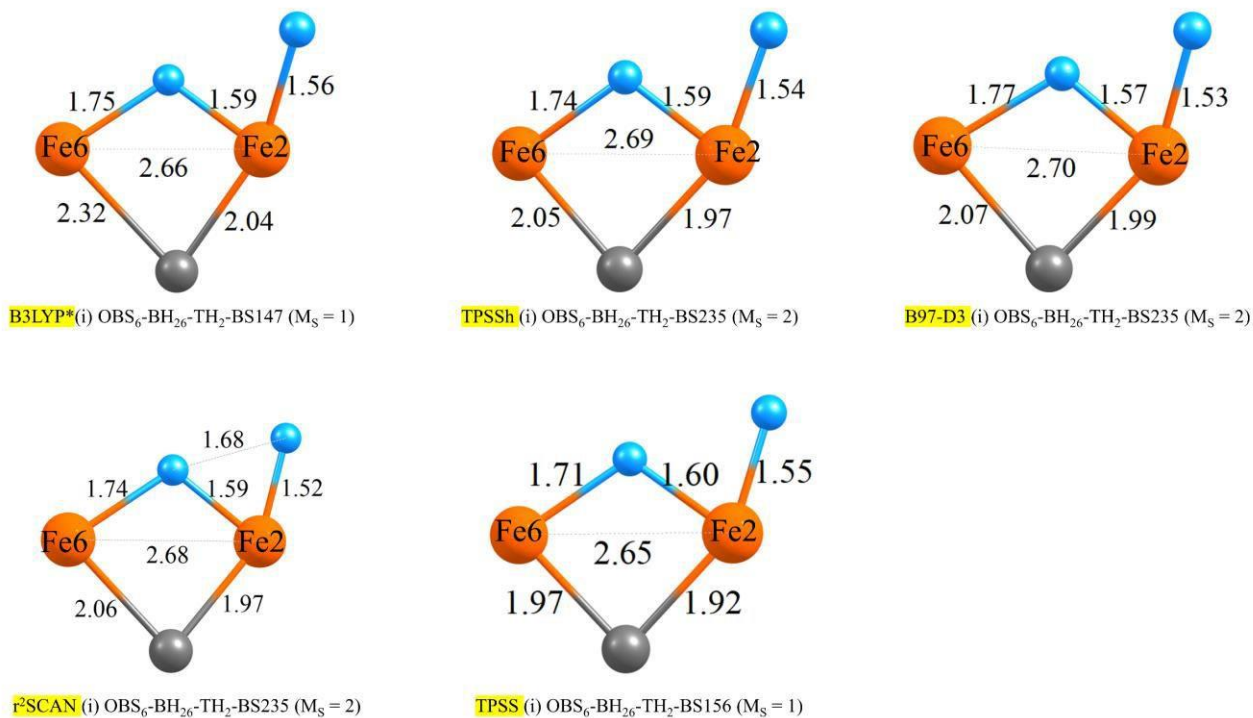

Figure S23. The comparison of key distances for isomers **i** with different functionals. The geometries of r<sup>2</sup>SCAN and other functionals were calculated using the QM-C and QM-A regions, respectively. Our previous paper show that the geometric and electronic structure differences between the QM-A and QM-C region are minor<sup>3</sup>.

The five functionals give similar electronic configurations for isomer **k** (**OBS<sub>6</sub>-DH<sub>2</sub>**) (see Figure S24) according to localized orbital analysis. Two electrons can be found in the dihydrogen ligand bound to Fe2, and 1 additional electron is located in the Fe<sub>4</sub> sub-cubane compared to the **E<sub>0</sub>** state (see Figure S11). The distances of Fe2-Fe6 are overall similar (see Figure S25), but the H-H bond lengths with B97-D3 and TPSS functionals are longer than with the other functionals. This correlates with shorter Fe2-H<sub>2</sub> distances for B97-D3 and TPSS compared to the other functionals, implying that the dihydrogen ligand is more activated in B97-D3 and TPSS calculations. The H-H bond of free H<sub>2</sub> is almost the same for five functionals (see Table S11), suggesting that the differences arise from the Fe-H<sub>2</sub> interaction.

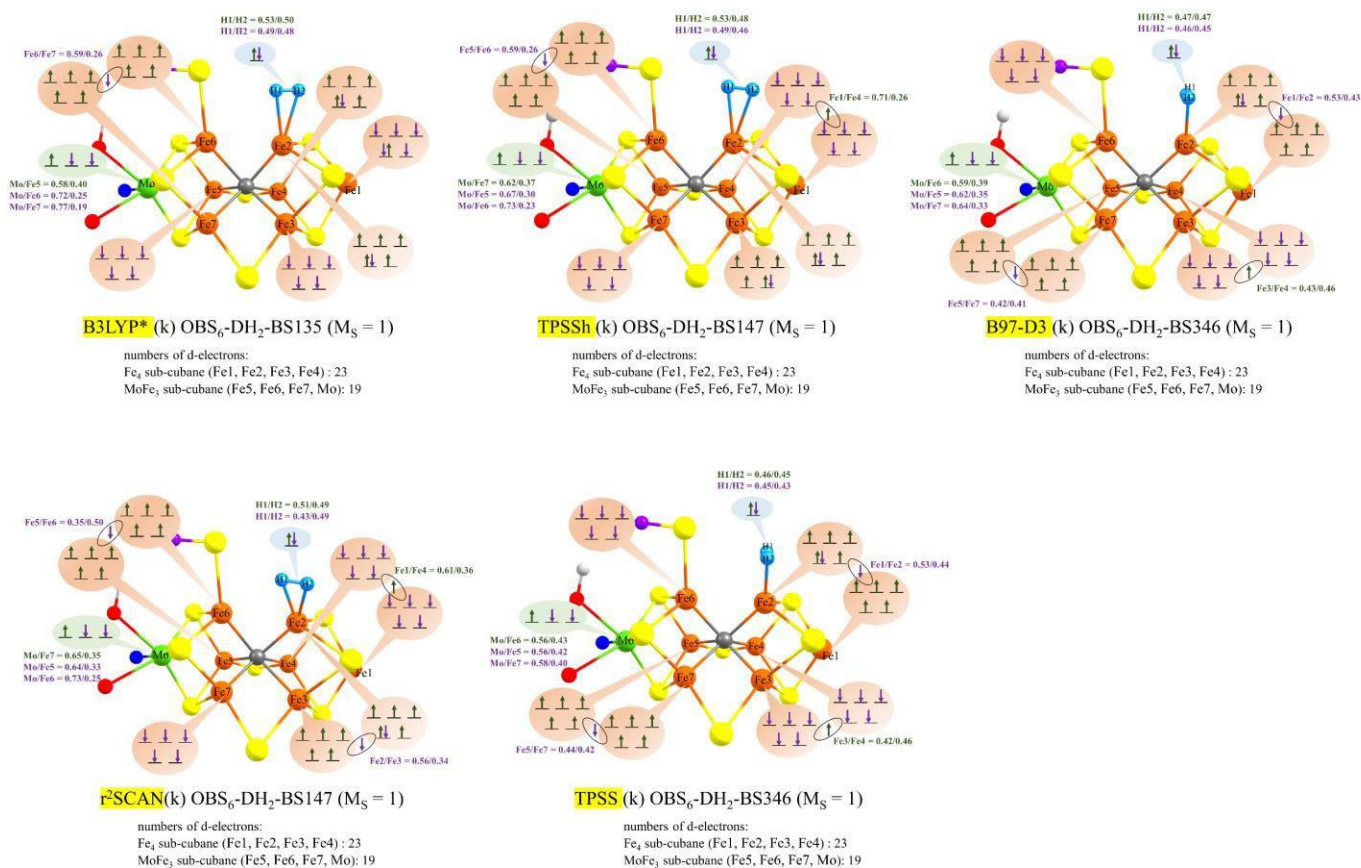

Figure S24. The comparison of electronic configurations for isomer **k** with different functionals. The green and purple numbers are localized orbital populations. The configurations of r<sup>2</sup>SCAN and other functionals were calculated using the QM-C and QM-A regions, respectively. Our previous paper show that generally the geometric and electronic structure differences between the QM-A and QM-C regions are relatively minor<sup>3</sup>.

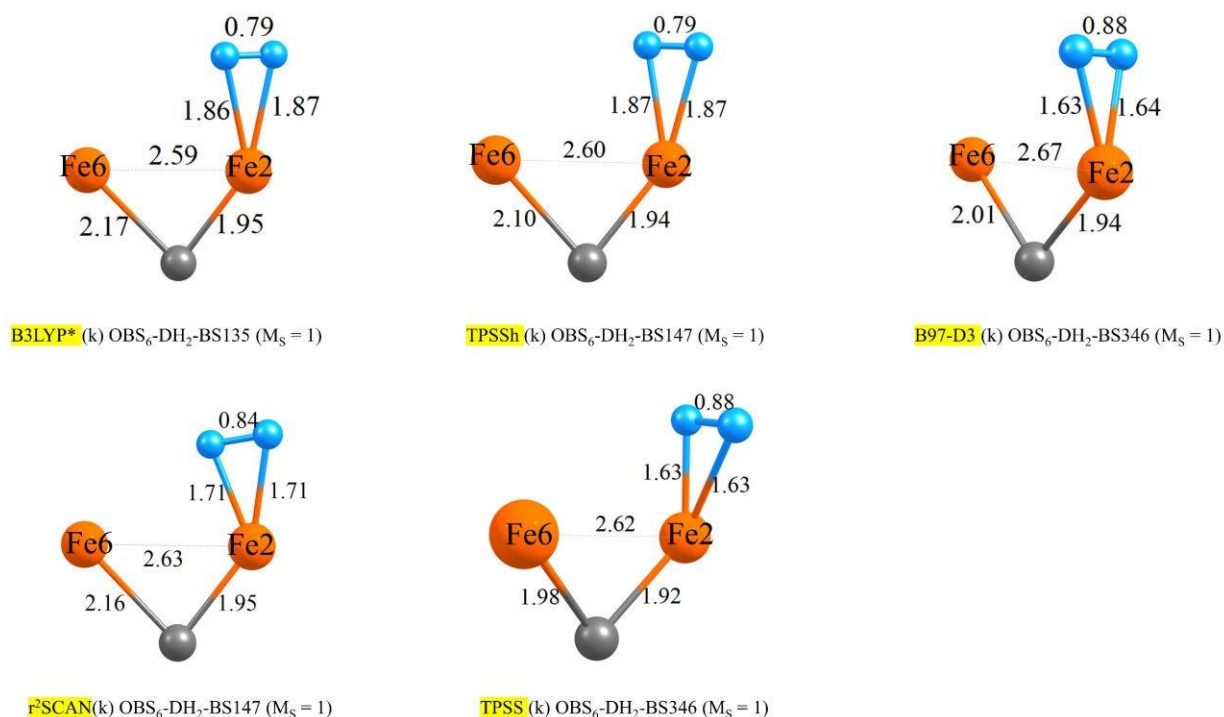

Figure S25. The comparison of key distances for isomer **k** with different functionals. The r<sup>2</sup>SCAN geometry was calculated using the QM-C region while the other functionals were calculated using the QM-A region. Our previous paper show that the geometric and electronic structure differences between the QM-A and QM-C region are minor<sup>3</sup>.

Table S11. The H-H bond of free H<sub>2</sub> calculated using different functionals in vacuum (same basis sets as H<sub>2</sub> in OBS<sub>6</sub>-DH<sub>2</sub>: ZORA-def2-TZVP).

|                                      | B3LYP* | TPSSh  | B97-D3 | r <sup>2</sup> SCAN | TPSS   |
|--------------------------------------|--------|--------|--------|---------------------|--------|
| The H-H Bonds of free H <sub>2</sub> | 0.75 Å | 0.74 Å | 0.75 Å | 0.74 Å              | 0.74 Å |

Table S12 to Table S28 show relative polarized QM and QM/MM energies for all 6 functionals using QM-region A and the BS solutions calculated. All energies are relative to isomer **k** (Figure 2k) for each functional.

Table S12. The relative polarized QM and QM/MM energies between five functionals for CBS<sub>26</sub>-2BH<sub>26(5),37</sub> (kcal/mol).

| a: CBS <sub>26</sub> -2BH <sub>26(5),37</sub> | B3LYP* |       | TPSSh |       | B97-D3 |       | r <sup>2</sup> SCAN |       | TPSS |       | B3LYP |       |
|-----------------------------------------------|--------|-------|-------|-------|--------|-------|---------------------|-------|------|-------|-------|-------|
|                                               | QM     | QM/MM | QM    | QM/MM | QM     | QM/MM | QM                  | QM/MM | QM   | QM/MM | QM    | QM/MM |
| BS245 (M <sub>S</sub> = 1)                    | 46.3   | 47.0  | 37.8  | 36.8  | -      | -     | 36.4                | 39.0  | 31.9 | 30.4  | 67.4  | 68.1  |
| BS145 (M <sub>S</sub> = 1)                    | 46.2   | 44.9  | 37.6  | 35.8  | 38.7   | 37.5  | 37.8                | 39.8  | 34.9 | 34.8  | 68.4  | 66.5  |

Note: The '-' in the table means that this state converged to another isomer. Numbers in blue indicate the lowest one between states.

Table S13. The relative polarized QM and QM/MM energies between five functionals for CBS<sub>26</sub>-2BH<sub>26(3),37</sub> (kcal/mol).

| b: CBS <sub>26</sub> -2BH <sub>26(3),37</sub> | B3LYP* |       | TPSSh |       | B97-D3 |       | r <sup>2</sup> SCAN |       | TPSS |       | B3LYP |       |
|-----------------------------------------------|--------|-------|-------|-------|--------|-------|---------------------|-------|------|-------|-------|-------|
|                                               | QM     | QM/MM | QM    | QM/MM | QM     | QM/MM | QM                  | QM/MM | QM   | QM/MM | QM    | QM/MM |
| BS137 (M <sub>S</sub> = 1)                    | -      | -     | 24.9  | 30.5  | -      | -     | 24.4                | 34.3  | 17.6 | 23.9  | -     | -     |
| BS145 (M <sub>S</sub> = 1)                    | -      | -     | 27.1  | 32.1  | 27.8   | 33.9  | 28.3                | 37.8  | 24.0 | 30.2  | -     | -     |
| BS245 (M <sub>S</sub> = 1)                    | 38.9   | 47.1  | 24.9  | 30.5  | -      | -     | 29.2                | 39.3  | 20.1 | 27.2  | 57.1  | 65.3  |

Note: The '-' in the table means that this state converged to another isomer. Numbers in blue indicate the lowest one between states.

Table S14. The relative polarized QM and QM/MM energies between five functionals for CBS<sub>37</sub>-2BH<sub>26(5),37</sub> (kcal/mol).

| c: CBS <sub>37</sub> -2BH <sub>26(5),37</sub> | B3LYP* |       | TPSSh |       | B97-D3 |       | r <sup>2</sup> SCAN |       | TPSS |       | B3LYP |       |
|-----------------------------------------------|--------|-------|-------|-------|--------|-------|---------------------|-------|------|-------|-------|-------|
|                                               | QM     | QM/MM | QM    | QM/MM | QM     | QM/MM | QM                  | QM/MM | QM   | QM/MM | QM    | QM/MM |
| BS345 (M <sub>S</sub> = 1)                    | 43.8   | 40.1  | 36.3  | 30.6  | -      | -     | 35.0                | 32.8  | -    | -     | 64.3  | 60.4  |
| BS126 (M <sub>S</sub> = 1)                    | -      | -     | 36.9  | 32.0  | -      | -     | 36.6                | 35.0  | -    | -     | -     | -     |
| BS157 (M <sub>S</sub> = 1)                    | 46.1   | 43.1  | 38.3  | 33.1  | 37.1   | 33.4  | 38.1                | 36.7  | -    | -     | 66.2  | 62.9  |

Note: The '-' in the table means that this state converged to another isomer. Numbers in blue indicate the lowest one between states.

Table S15. The relative polarized QM and QM/MM energies between five functionals for CBS<sub>37</sub>-2BH<sub>26(3),37</sub> (kcal/mol).

| d: CBS <sub>37</sub> -2BH <sub>26(3),37</sub> | B3LYP* |       | TPSSh |       | B97-D3 |       | r <sup>2</sup> SCAN |       | TPSS |       | B3LYP |       |
|-----------------------------------------------|--------|-------|-------|-------|--------|-------|---------------------|-------|------|-------|-------|-------|
|                                               | QM     | QM/MM | QM    | QM/MM | QM     | QM/MM | QM                  | QM/MM | QM   | QM/MM | QM    | QM/MM |
| BS345 (M <sub>S</sub> = 1)                    | 40.5   | 43.3  | 28.1  | 28.8  | 26.3   | 28.4  | 26.8                | 31.4  | -    | -     | -     | -     |
| BS126 (M <sub>S</sub> = 1)                    | 44.0   | 47.8  | 28.3  | 30.9  | -      | -     | 28.0                | 33.9  | -    | -     | -     | -     |

|                     |      |      |      |      |      |      |      |      |      |                   |      |      |
|---------------------|------|------|------|------|------|------|------|------|------|-------------------|------|------|
| BS135 ( $M_S = 1$ ) | 36.6 | 40.1 | 28.8 | 30.3 | 26.2 | 29.2 | 27.2 | 32.4 | 23.7 | 25.5 <sup>a</sup> | 58.9 | 62.2 |
|---------------------|------|------|------|------|------|------|------|------|------|-------------------|------|------|

<sup>a</sup>This state converged to BS15.

Note: The ‘-’ in the table means that this state converged to another isomer. Numbers in blue indicate the lowest one between states.

Table S16. The relative polarized QM and QM/MM energies between five functionals for **CBS<sub>26</sub>-BH<sub>26</sub>-TH<sub>5</sub>** (kcal/mol).

| e: CBS <sub>26</sub> -BH <sub>26</sub> -TH <sub>5</sub> | B3LYP* |       | TPSSh |       | B97-D3 |       | r <sup>2</sup> SCAN |       | TPSS |                   | B3LYP |       |
|---------------------------------------------------------|--------|-------|-------|-------|--------|-------|---------------------|-------|------|-------------------|-------|-------|
|                                                         | QM     | QM/MM | QM    | QM/MM | QM     | QM/MM | QM                  | QM/MM | QM   | QM/MM             | QM    | QM/MM |
| BS13 ( $M_S = 2$ )                                      | 32.0   | 31.4  | 17.2  | 14.8  | 16.6   | 14.8  | 16.8                | 17.8  | 13.7 | 11.2              | 56.5  | 55.5  |
| BS236 ( $M_S = 2$ )                                     | 23.7   | 21.7  | 16.5  | 12.8  | 18.3   | 15.5  | 16.4                | 16.2  | 17.2 | 13.8              | 46.1  | 43.6  |
| BS126 ( $M_S = 2$ )                                     | 27.4   | 25.9  | 18.4  | 15.6  | 17.5   | 15.7  | 16.9                | 17.8  | 15.9 | 13.1 <sup>a</sup> | 51.4  | 48.7  |
| BS236 ( $M_S = 1$ )                                     | 25.7   | 25.7  | 18.8  | 16.8  | 22.2   | 21.1  | 16.6                | 18.4  | 21.1 | 17.5              | 40.7  | 40.6  |
| BS2356 ( $M_S = 0$ )                                    | 32.7   | 29.9  | 21.2  | 16.6  | 22.7   | 18.9  | 19.9                | 18.8  | 21.5 | 17.8              | 51.9  | 49.0  |

<sup>a</sup>This state converged to BS12. Numbers in blue indicate the lowest one between states.

Table S17. The relative polarized QM and QM/MM energies between five functionals for **CBS<sub>26</sub>-2TH<sub>4,5</sub>** (kcal/mol).

| f: CBS <sub>26</sub> -2TH <sub>4,5</sub> | B3LYP* |       | TPSSh |       | B97-D3 |       | r <sup>2</sup> SCAN |       | TPSS |                  | B3LYP |       |
|------------------------------------------|--------|-------|-------|-------|--------|-------|---------------------|-------|------|------------------|-------|-------|
|                                          | QM     | QM/MM | QM    | QM/MM | QM     | QM/MM | QM                  | QM/MM | QM   | QM/MM            | QM    | QM/MM |
| BS346 ( $M_S = 2$ )                      | 20.9   | 26.0  | 10.0  | 13.4  | 10.1   | 13.9  | 10.1                | 16.6  | 6.5  | 9.6              | 41.2  | 45.8  |
| BS345 ( $M_S = 2$ )                      | 20.2   | 25.2  | 10.8  | 14.0  | 12.5   | 16.3  | 8.9                 | 15.4  | 10.9 | 13.6             | 40.6  | 44.7  |
| BS234 ( $M_S = 1$ )                      | 18.3   | 25.3  | 8.1   | 13.2  | 5.9    | 11.0  | 7.8                 | 15.7  | 2.5  | 6.8              | 43.5  | 48.3  |
| BS167 ( $M_S = 1$ )                      | 18.8   | 25.9  | 8.3   | 13.8  | 7.6    | 13.3  | 7.1                 | 15.6  | 4.5  | 7.5 <sup>a</sup> | 40.1  | 46.5  |
| BS236 ( $M_S = 1$ )                      | 19.7   | 25.1  | 13.1  | 16.9  | 13.5   | 17.8  | 11.3                | 18.0  | 10.1 | 12.7             | 43.8  | 48.0  |

<sup>a</sup>This state converged to BS17. Numbers in blue indicate the lowest one between states.

Table S18. The relative polarized QM and QM/MM energies between five functionals for **OBS<sub>6</sub>-2BH<sub>26</sub>** (kcal/mol).

| g: OBS <sub>6</sub> -2BH <sub>26</sub> | B3LYP* |                   | TPSSh |       | B97-D3 |       | r <sup>2</sup> SCAN |       | TPSS |       | B3LYP |       |
|----------------------------------------|--------|-------------------|-------|-------|--------|-------|---------------------|-------|------|-------|-------|-------|
|                                        | QM     | QM/MM             | QM    | QM/MM | QM     | QM/MM | QM                  | QM/MM | QM   | QM/MM | QM    | QM/MM |
| BS345 ( $M_S = 1$ )                    | 11.9   | 12.6 <sup>a</sup> | 5.1   | 4.2   | 2.7    | 1.9   | 1.2                 | 1.9   | 5.1  | 5.1   | -     | -     |
| BS347 ( $M_S = 1$ )                    | 11.9   | 12.6              | 4.0   | 3.7   | 1.4    | 1.0   | 0.3                 | 1.3   | 4.6  | 4.5   | 30.7  | 30.8  |
| BS2356 ( $M_S = 0$ )                   | 11.9   | 13.0              | 0.0   | 0.0   | 0.0    | 0.0   | 0.1                 | 1.6   | 0.0  | 0.0   | 34.2  | 34.5  |
| BS2467 ( $M_S = 0$ )                   | 13.2   | 14.2              | 1.3   | 1.4   | 0.5    | 0.9   | 1.0                 | 2.8   | 0.4  | 0.8   | 39.2  | 35.8  |
| BS147 ( $M_S = 0$ )                    | 11.9   | 13.0              | 0.0   | 0.0   | 0.0    | 0.0   | 0.0                 | 1.6   | 0.0  | 0.0   | 38.7  | 34.3  |

<sup>a</sup>This state converged to BS347. Numbers in blue indicate the lowest one between states.

Table S19. The relative polarized QM and QM/MM energies between five functionals for **OBS<sub>2</sub>-2BH<sub>26</sub>** (kcal/mol).

| h: OBS <sub>2</sub> -2BH <sub>26</sub> | B3LYP* |       | TPSSh |       | B97-D3 |       | r <sup>2</sup> SCAN |       | TPSS |       | B3LYP |       |
|----------------------------------------|--------|-------|-------|-------|--------|-------|---------------------|-------|------|-------|-------|-------|
|                                        | QM     | QM/MM | QM    | QM/MM | QM     | QM/MM | QM                  | QM/MM | QM   | QM/MM | QM    | QM/MM |
| BS147 ( $M_S = 1$ )                    | 20.5   | 22.3  | 12.8  | 12.7  | 13.6   | 15.0  | 10.5                | 14.2  | 15.8 | 15.7  | 47.7  | 44.6  |



|                                      |      |      |      |      |      |      |      |      |      |      |      |      |
|--------------------------------------|------|------|------|------|------|------|------|------|------|------|------|------|
| <b>BS2356 (<math>M_S = 0</math>)</b> | 21.0 | 22.1 | 12.6 | 11.5 | 12.0 | 12.6 | 11.4 | 13.3 | 12.5 | 12.2 | 50.2 | 45.9 |
| <b>BS2467 (<math>M_S = 0</math>)</b> | 20.2 | 22.6 | 12.4 | 12.3 | 11.2 | 12.9 | 10.7 | 14.1 | 11.9 | 12.2 | 49.4 | 45.9 |
| <b>BS135 (<math>M_S = 0</math>)</b>  | 20.2 | 22.6 | 12.4 | 12.3 | 11.3 | 13.0 | 10.8 | 14.2 | 11.8 | 12.2 | 49.4 | 45.9 |
| <b>BS147 (<math>M_S = 0</math>)</b>  | 21.7 | 22.7 | 13.5 | 12.2 | 12.5 | 13.1 | 12.5 | 14.2 | 13.3 | 13.0 | 49.7 | 45.6 |

Table S20. The relative polarized QM and QM/MM energies between five functionals for **OBS<sub>6</sub>-BH<sub>26</sub>-TH<sub>2</sub>** (kcal/mol).

| i: OBS <sub>6</sub> -BH <sub>26</sub> -TH <sub>2</sub> | B3LYP* |       | TPSSh |       | B97-D3 |       | r <sup>2</sup> SCAN |       | TPSS |       | B3LYP |       |
|--------------------------------------------------------|--------|-------|-------|-------|--------|-------|---------------------|-------|------|-------|-------|-------|
|                                                        | QM     | QM/MM | QM    | QM/MM | QM     | QM/MM | QM                  | QM/MM | QM   | QM/MM | QM    | QM/MM |
| <b>BS235 (<math>M_S = 2</math>)</b>                    | 10.4   | 11.1  | 2.8   | 2.2   | 1.5    | 1.1   | -2.2                | 0.2   | 3.7  | 3.6   | 28.5  | 29.7  |
| <b>BS247 (<math>M_S = 2</math>)</b>                    | 9.3    | 11.5  | 1.9   | 2.9   | 0.3    | 1.1   | -1.9                | 1.7   | 2.8  | 3.5   | 28.7  | 30.1  |
| <b>BS156 (<math>M_S = 1</math>)</b>                    | 13.2   | 15.7  | 3.4   | 4.3   | 1.0    | 1.7   | 0.0                 | 2.5   | 2.0  | 2.3   | 35.5  | 38.2  |
| <b>BS157 (<math>M_S = 1</math>)</b>                    | 13.0   | 15.1  | 3.7   | 4.1   | 1.4    | 1.7   | 0.2                 | 2.5   | 3.7  | 4.2   | 39.6  | 41.2  |
| <b>BS346 (<math>M_S = 1</math>)</b>                    | 12.5   | 12.7  | 5.5   | 4.3   | 2.1    | 1.2   | 1.3                 | 2.2   | 6.9  | 5.6   | 30.5  | 31.0  |
| <b>BS147 (<math>M_S = 1</math>)</b>                    | 9.6    | 10.6  | 4.1   | 3.9   | 3.0    | 2.5   | 0.5                 | 2.0   | 8.5  | 8.2   | 26.8  | 27.3  |

Numbers in blue indicate the lowest one between states.

Table S21. The relative polarized QM and QM/MM energies between five functionals for **OBS<sub>2</sub>-BH<sub>26</sub>-TH<sub>6</sub>** (kcal/mol).

| j: OBS <sub>2</sub> -BH <sub>26</sub> -TH <sub>6</sub> | B3LYP* |       | TPSSh |       | B97-D3 |       | r <sup>2</sup> SCAN |       | TPSS |       | B3LYP |       |
|--------------------------------------------------------|--------|-------|-------|-------|--------|-------|---------------------|-------|------|-------|-------|-------|
|                                                        | QM     | QM/MM | QM    | QM/MM | QM     | QM/MM | QM                  | QM/MM | QM   | QM/MM | QM    | QM/MM |
| <b>BS235 (<math>M_S = 1</math>)</b>                    | 20.3   | 23.7  | 14.1  | 15.2  | 8.8    | 10.3  | 11.8                | 14.9  | 11.7 | 11.5  | 42.4  | 45.0  |
| <b>BS247 (<math>M_S = 1</math>)</b>                    | 20.9   | 23.6  | 15.2  | 15.2  | 11.2   | 12.4  | 12.6                | 14.9  | 13.3 | 13.1  | 45.0  | 47.2  |
| <b>BS347 (<math>M_S = 1</math>)</b>                    | 23.0   | 26.8  | 15.0  | 16.2  | 10.8   | 13.6  | 10.5                | 14.2  | -    | -     | -     | -     |
| <b>BS147 (<math>M_S = 1</math>)</b>                    | 19.0   | 22.0  | 14.5  | 14.7  | 13.2   | 14.7  | 9.6                 | 13.6  | 18.3 | 18.3  | 42.3  | 44.8  |
| <b>BS2356 (<math>M_S = 0</math>)</b>                   | 23.9   | 25.4  | 14.6  | 14.2  | 14.0   | 15.2  | 12.8                | 15.4  | -    | -     | 44.2  | 45.3  |

Note: The ‘-’ in the table means that this state converged to another isomer. Numbers in blue indicate the lowest one between states.

Table S22. The relative polarized QM and QM/MM energies between five functionals for **OBS<sub>6</sub>-DH<sub>2</sub>** (kcal/mol).

| k: OBS <sub>6</sub> -DH <sub>2</sub> | B3LYP* |       | TPSSh |       | B97-D3 |       | r <sup>2</sup> SCAN |       | TPSS |       | B3LYP |       |
|--------------------------------------|--------|-------|-------|-------|--------|-------|---------------------|-------|------|-------|-------|-------|
|                                      | QM     | QM/MM | QM    | QM/MM | QM     | QM/MM | QM                  | QM/MM | QM   | QM/MM | QM    | QM/MM |
| <b>BS235 (<math>M_S = 2</math>)</b>  | 9.8    | 9.2   | 4.5   | 2.1   | 3.9    | 2.1   | 1.2                 | 1.8   | -    | -     | 24.9  | 24.1  |
| <b>BS236 (<math>M_S = 2</math>)</b>  | 7.8    | 7.0   | 3.6   | 1.8   | 6.2    | 4.8   | 1.1                 | 2.0   | 15.5 | 13.6  | 21.4  | 19.8  |
| <b>BS346 (<math>M_S = 1</math>)</b>  | 9.5    | 8.5   | 4.4   | 2.1   | 2.5    | 0.7   | 0.8                 | 1.6   | 10.5 | 8.4   | 24.9  | 23.3  |
| <b>BS135 (<math>M_S = 1</math>)</b>  | 5.5    | 4.5   | 5.3   | 2.4   | 4.4    | 2.2   | 1.2                 | 1.2   | 14.6 | 12.4  | 23.7  | 21.8  |
| <b>BS147 (<math>M_S = 1</math>)</b>  | 8.5    | 6.6   | 4.2   | 1.1   | 4.1    | 1.5   | 0                   | 0.0   | 14.1 | 11.2  | 22.9  | 20.6  |

Note: The ‘-’ in the table means that this state converged to another isomer; in this case, H<sub>2</sub> dissociates from the Fe. Numbers in blue indicate the lowest one between states.

Table S23. The relative polarized QM and QM/MM energies between five functionals for **OBS<sub>2</sub>-DH<sub>6</sub>** (kcal/mol).

| l: OBS <sub>2</sub> -DH <sub>6</sub> | B3LYP* |                   | TPSSh |       | B97-D3 |       | r <sup>2</sup> SCAN |       | TPSS |       | B3LYP |       |
|--------------------------------------|--------|-------------------|-------|-------|--------|-------|---------------------|-------|------|-------|-------|-------|
|                                      | QM     | QM/MM             | QM    | QM/MM | QM     | QM/MM | QM                  | QM/MM | QM   | QM/MM | QM    | QM/MM |
| BS346 (M <sub>S</sub> = 2)           | -      | -                 | -     | -     | 1.2    | 5.0   | -0.7                | 5.7   | 8.7  | 11.2  | -     | -     |
| BS236 (M <sub>S</sub> = 2)           | 9.9    | 15.5              | -     | -     | 11.9   | 15.1  | 7.2                 | 13.1  | 20.1 | 21.6  | -     | -     |
| BS235 (M <sub>S</sub> = 1)           | -      | -                 | -     | -     | 7.5    | 10.3  | 9.3                 | 12.1  | 10.7 | 12.0  | -     | -     |
| BS347 (M <sub>S</sub> = 1)           | -      | -                 | -     | -     | 9.8    | 13.0  | 6.0                 | 9.5   | 17.2 | 19.3  | -     | -     |
| BS127 (M <sub>S</sub> = 0)           | 21.2   | 24.3 <sup>a</sup> | 12.9  | 14.4  | 10.4   | 12.5  | 10.1                | 14.2  | 16.2 | 17.0  | 41.2  | 38.5  |
| BS147 (M <sub>S</sub> = 0)           | 20.2   | 23.9              | 12.3  | 14.1  | 12.0   | 14.2  | 8.5                 | 13.7  | 16.7 | 17.8  | -     | -     |

<sup>a</sup>This state converged to BS1267.

Note: The '-' in the table means that this state converged to another minimum; in this case, H<sub>2</sub> dissociates from the Fe. Numbers in blue indicate the lowest one between states.

Table S24. The relative polarized QM and QM/MM energies between five functionals for CBS<sub>37</sub>-OBS<sub>2</sub>-BH<sub>26</sub> (kcal/mol).

| m: CBS <sub>37</sub> -OBS <sub>2</sub> -BH <sub>26</sub> | B3LYP* |       | TPSSh |       | B97-D3 |       | r <sup>2</sup> SCAN |       | TPSS |                   | B3LYP |       |
|----------------------------------------------------------|--------|-------|-------|-------|--------|-------|---------------------|-------|------|-------------------|-------|-------|
|                                                          | QM     | QM/MM | QM    | QM/MM | QM     | QM/MM | QM                  | QM/MM | QM   | QM/MM             | QM    | QM/MM |
| BS235 (M <sub>S</sub> = 2)                               | 27.6   | 27.5  | 22.3  | 22.8  | 25.7   | 27.4  | 22.7                | 26.7  | -    | -                 | 44.1  | 44.6  |
| BS247 (M <sub>S</sub> = 2)                               | 30.2   | 31.7  | 23.9  | 23.1  | 26.0   | 25.6  | 23.3                | 25.9  | 31.4 | 29.4              | 44.2  | 46.8  |
| BS347 (M <sub>S</sub> = 1)                               | 28.3   | 30.7  | 24.4  | 25.1  | 22.9   | 23.5  | 22.4                | 25.9  | 27.3 | 25.7 <sup>a</sup> | 46.7  | 50.0  |
| BS125 (M <sub>S</sub> = 1)                               | 35.3   | 34.7  | 24.9  | 26.5  | 26.0   | 27.8  | 21.9                | 26.7  | 34.7 | 35.0              | 50.1  | 50.2  |
| BS147 (M <sub>S</sub> = 1)                               | 26.1   | 28.0  | 21.2  | 21.6  | 23.9   | 23.6  | 21.9                | 24.7  | -    | -                 | 43.6  | 46.1  |

<sup>a</sup>This state converged to BS3467.

Note: The '-' in the table means that this state converged to another isomer. Numbers in blue indicate the lowest one between states.

Table S25. The relative polarized QM and QM/MM energies between five functionals for CBS<sub>37</sub>-OBS<sub>6</sub>-BH<sub>26</sub> (kcal/mol).

| n: CBS <sub>37</sub> -OBS <sub>6</sub> -BH <sub>26</sub> | B3LYP* |       | TPSSh |       | B97-D3 |       | r <sup>2</sup> SCAN |       | TPSS |       | B3LYP |       |
|----------------------------------------------------------|--------|-------|-------|-------|--------|-------|---------------------|-------|------|-------|-------|-------|
|                                                          | QM     | QM/MM | QM    | QM/MM | QM     | QM/MM | QM                  | QM/MM | QM   | QM/MM | QM    | QM/MM |
| BS247 (M <sub>S</sub> = 2)                               | 13.9   | 17.3  | 8.1   | 11.1  | 8.3    | 11.1  | 6.9                 | 13.1  | 13.2 | 16.2  | 25.9  | 26.2  |
| BS237 (M <sub>S</sub> = 2)                               | 16.6   | 20.1  | 12.1  | 15.0  | 13.5   | 15.1  | 9.0                 | 14.0  | 19.6 | 21.5  | 29.4  | 28.4  |
| BS347 (M <sub>S</sub> = 1)                               | 12.7   | 16.2  | 11.8  | 15.1  | 10.9   | 13.1  | 8.2                 | 13.8  | 18.4 | 19.6  | 24.5  | 27.0  |
| BS234 (M <sub>S</sub> = 1)                               | 20.1   | 21.7  | 10.0  | 13.4  | 9.3    | 11.8  | 9.7                 | 14.6  | 15.2 | 17.4  | 24.5  | 28.3  |
| BS156 (M <sub>S</sub> = 1)                               | 18.0   | 20.0  | 12.3  | 16.0  | 12.3   | 14.5  | 8.8                 | 14.6  | 15.2 | 17.8  | 39.1  | 39.8  |

Table S26. The relative polarized QM and QM/MM energies between five functionals for 2CBS<sub>26,37</sub>-BH<sub>26(5)</sub> (kcal/mol).

| o: 2CBS <sub>26,37</sub> -BH <sub>26(5)</sub> | B3LYP* |       | TPSSh |       | B97-D3 |       | r <sup>2</sup> SCAN |       | TPSS |       | B3LYP |       |
|-----------------------------------------------|--------|-------|-------|-------|--------|-------|---------------------|-------|------|-------|-------|-------|
|                                               | QM     | QM/MM | QM    | QM/MM | QM     | QM/MM | QM                  | QM/MM | QM   | QM/MM | QM    | QM/MM |
| BS134 (M <sub>S</sub> = 0)                    | 26.4   | 28.4  | 19.2  | 19.2  | 23.9   | 23.4  | 19.0                | 22.1  | 29.6 | 30.0  | 41.8  | 45.3  |
| BS2467 (M <sub>S</sub> = 0)                   | 22.8   | 27.5  | 12.6  | 16.4  | 17.3   | 20.2  | 15.6                | 22.1  | 18.3 | 21.6  | 39.7  | 43.8  |
| BS14 (M <sub>S</sub> = 2)                     | -      | -     | -     | -     | 18.5   | 19.0  | 16.3                | 20.3  | 19.6 | 20.3  | 46.7  | 49.8  |

|                                  |      |      |      |      |      |      |      |      |      |                   |      |      |
|----------------------------------|------|------|------|------|------|------|------|------|------|-------------------|------|------|
| <b>BS347 (M<sub>S</sub> = 2)</b> | 25.7 | 28.2 | 15.0 | 16.1 | 15.5 | 16.7 | 16.7 | 21.0 | -    | -                 | 38.2 | 41.8 |
| <b>BS126 (M<sub>S</sub> = 2)</b> | 23.3 | 26.7 | 16.2 | 18.9 | 16.3 | 17.9 | 16.8 | 21.9 | 19.6 | 20.4 <sup>a</sup> | 45.0 | 44.8 |

<sup>a</sup>This state converged to BS12.

Note: The '-' in the table means that this state converged to another isomer. Numbers in blue indicate the lowest one between states.

Table S27. The relative polarized QM and QM/MM energies between five functionals for **2CBS<sub>26,37</sub>-BH<sub>26(3)</sub>** (kcal/mol).

| <b>p: 2CBS<sub>26,37</sub>-BH<sub>26(3)</sub></b> | <b>B3LYP*</b> |       | <b>TPSSh</b> |       | <b>B97-D3</b> |       | <b>r<sup>2</sup>SCAN</b> |       | <b>TPSS</b> |                   | <b>B3LYP</b> |       |
|---------------------------------------------------|---------------|-------|--------------|-------|---------------|-------|--------------------------|-------|-------------|-------------------|--------------|-------|
|                                                   | QM            | QM/MM | QM           | QM/MM | QM            | QM/MM | QM                       | QM/MM | QM          | QM/MM             | QM           | QM/MM |
| <b>BS134 (M<sub>S</sub> = 0)</b>                  | 20.5          | 30.2  | 11.3         | 20.2  | 16.3          | 24.3  | 11.5                     | 23.8  | 11.7        | 21.7 <sup>a</sup> | 39.7         | 47.4  |
| <b>BS2467 (M<sub>S</sub> = 0)</b>                 | 22.7          | 30.2  | 4.6          | 15.5  | 8.9           | 19.5  | 7.1                      | 21.7  | 9.6         | 20.2              | 47.9         | 64.2  |
| <b>BS145 (M<sub>S</sub> = 0)</b>                  | 18.4          | 31.0  | 9.0          | 19.2  | 11.5          | 19.7  | 10.7                     | 23.6  | 11.6        | 20.8              | 32.0         | 45.1  |
| <b>BS135 (M<sub>S</sub> = 0)</b>                  | 15.4          | 27.1  | 4.5          | 15.5  | 8.9           | 19.5  | 7.2                      | 21.6  | 9.6         | 20.2              | 30.4         | 42.6  |
| <b>BS14 (M<sub>S</sub> = 2)</b>                   | -             | -     | 7.0          | 14.1  | 10.5          | 17.6  | 8.6                      | 18.4  | 10.9        | 17.8              | -            | -     |

<sup>a</sup>This state converged to BS13.

Note: The '-' in the table means that this state converged to another isomer. Numbers in blue indicate the lowest one between states.

Table S28. The relative polarized QM and QM/MM energies between five functionals for **2CBS<sub>26,37</sub>-BH<sub>37</sub>** (kcal/mol).

| <b>q: 2CBS<sub>26,37</sub>-BH<sub>37</sub></b> | <b>B3LYP*</b> |                   | <b>TPSSh</b> |       | <b>B97-D3</b> |       | <b>r<sup>2</sup>SCAN</b> |       | <b>TPSS</b> |                   | <b>B3LYP</b> |       |
|------------------------------------------------|---------------|-------------------|--------------|-------|---------------|-------|--------------------------|-------|-------------|-------------------|--------------|-------|
|                                                | QM            | QM/MM             | QM           | QM/MM | QM            | QM/MM | QM                       | QM/MM | QM          | QM/MM             | QM           | QM/MM |
| <b>BS346 (M<sub>S</sub> = 1)</b>               | 14.9          | 19.5              | 8.2          | 13.0  | 10.6          | 15.2  | 4.4                      | 13.4  | 5.23        | 8.4               | 31.6         | 36.0  |
| <b>BS135 (M<sub>S</sub> = 1)</b>               | 16.2          | 20.7              | 6.8          | 11.4  | 8.7           | 12.8  | 7.3                      | 13.8  | 6.30        | 10.2 <sup>b</sup> | 31.2         | 35.3  |
| <b>BS167 (M<sub>S</sub> = 2)</b>               | 14.8          | 21.5 <sup>a</sup> | 4.7          | 11.2  | 8.5           | 14.1  | 5.3                      | 13.4  | -           | -                 | 30.0         | 36.7  |
| <b>BS235 (M<sub>S</sub> = 2)</b>               | 12.0          | 17.3              | 2.3          | 7.4   | 8.5           | 12.5  | 6.2                      | 13.0  | 11.63       | 15.1              | 28.8         | 33.2  |
| <b>BS346 (M<sub>S</sub> = 2)</b>               | 9.9           | 15.4              | 0.0          | 5.5   | 4.8           | 8.8   | 3.6                      | 10.5  | 6.33        | 10.6              | 23.6         | 29.5  |

<sup>a</sup>This state converged to BS257.

<sup>b</sup>This state converged to BS15.

Note: The '-' in the table means that this state converged to another isomer. Numbers in blue indicate the lowest one between states.

Table S29. The relative polarized QM and QM/MM energies between five functionals for **C3H** (kcal/mol).

| <b>r: C3H</b>                    | <b>B3LYP*</b> |       | <b>TPSSh</b> |       | <b>B97-D3</b> |       | <b>r<sup>2</sup>SCAN</b> |       | <b>TPSS</b> |       | <b>B3LYP</b> |       |
|----------------------------------|---------------|-------|--------------|-------|---------------|-------|--------------------------|-------|-------------|-------|--------------|-------|
|                                  | QM            | QM/MM | QM           | QM/MM | QM            | QM/MM | QM                       | QM/MM | QM          | QM/MM | QM           | QM/MM |
| <b>BS125 (M<sub>S</sub> = 1)</b> | 13.2          | 14.1  | -            | -     | 31.3          | 28.9  | 47.8                     | 47.9  | 73.4        | 76.0  | 10.9         | 12.0  |
| <b>BS127 (M<sub>S</sub> = 1)</b> | 1.2           | 0.0   | 32.9         | 30.0  | 35.3          | 32.9  | 49.9                     | 50.5  | 81.6        | 78.1  | 11.7         | 12.9  |
| <b>BS135 (M<sub>S</sub> = 1)</b> | 3.3           | 2.7   | 51.7         | 52.0  | 34.7          | 33.0  | 51.3                     | 52.3  | 80.3        | 75.9  | 2.7          | 2.0   |
| <b>BS136 (M<sub>S</sub> = 1)</b> | 0.6           | 0.3   | 25.7         | 25.7  | 31.1          | 29.8  | 52.6                     | 54.7  | 75.9        | 73.0  | 0.5          | 0.0   |
| <b>BS146 (M<sub>S</sub> = 1)</b> | 0.0           | 0.2   | 25.3         | 25.1  | 34.1          | 31.7  | 47.8                     | 49.0  | 105.0       | 105.9 | 0.0          | 0.0   |
| <b>BS147 (M<sub>S</sub> = 1)</b> | 3.2           | 2.8   | 27.5         | 26.9  | 36.5          | 33.6  | 50.4                     | 51.5  | -           | -     | 2.8          | 2.2   |

## 10. Additional comparisons for three lowest-energy isomers: dispersion correction and zero-point vibrational energy

Additional calculations were carried out for the 3 lowest energy isomers: **g**, **i** and **k** to see whether their relative energies might be affected much by either dispersion or zero-point vibrational effects.

Table S30 shows the effect of not including the D4 dispersion correction in r<sup>2</sup>SCAN calculations. The effect of dispersion is found to be relatively small, not affecting much the relative energies of these 3 isomers. We note that the dispersion correction was used throughout the study.

Table S30. The relative QM/MM energies (kcal/mol) between three lowest-energy isomers with and without D4 corrections utilizing QM-region C.

|                                                          | $\Delta E(\text{QM/MM})$ with D4 | $\Delta E(\text{QM/MM})$ without D4 |
|----------------------------------------------------------|----------------------------------|-------------------------------------|
| <b>g: OBS<sub>6</sub>-2BH<sub>26</sub></b>               | 3.1                              | 3.2                                 |
| <b>i: OBS<sub>6</sub>-BH<sub>26</sub>-TH<sub>2</sub></b> | 3.3                              | 3.6                                 |
| <b>k: OBS<sub>6</sub>-DH<sub>2</sub></b>                 | 0.0                              | 0.0                                 |

Note: The results were calculated using r<sup>2</sup>SCAN. The spin states and BS solutions of **OBS<sub>6</sub>-2BH<sub>26</sub>**, **OBS<sub>6</sub>-BH<sub>26</sub>-TH<sub>2</sub>**, and **OBS<sub>6</sub>-DH<sub>2</sub>** are BS347 ( $M_s = 1$ ), BS235 ( $M_s = 2$ ), and BS147 ( $M_s = 1$ ), respectively.

The inclusion of zero-point vibrational motion could have an effect on **E<sub>3</sub>** isomer energies as the isomers differ in terms of Fe-H bonding. Table S31 shows the results of calculations where zero-point vibrational corrections were explicitly included via partial Hessian QM/MM calculations. Different partial Hessian approximations were tested. The ZPVE correction can change the energy differences by up to 0.7 kcal/mol as seen here but this differs with partial Hessian size and QM-region size. Overall the ZPVE effect is fairly small.

Table S31. The relative QM/MM energies between three lowest-energy isomers with and without zero-point vibrational energy (ZPVE) corrections (kcal/mol).

| Including Fe <sub>2</sub> +Fe <sub>6</sub> +2hydrides/H <sub>2</sub> as partial Hessian using QM-A region | $\Delta E(\text{QM/MM})$ without ZPVE | $\Delta E(\text{QM/MM})$ with ZPVE |
|-----------------------------------------------------------------------------------------------------------|---------------------------------------|------------------------------------|
| <b>g: OBS<sub>6</sub>-2BH<sub>26</sub></b>                                                                | 1.3                                   | 1.0                                |
| <b>i: OBS<sub>6</sub>-BH<sub>26</sub>-TH<sub>2</sub></b>                                                  | 0.2                                   | 0.0                                |
| <b>k: OBS<sub>6</sub>-DH<sub>2</sub></b>                                                                  | 0.0                                   | 0.3                                |
| Including FeMoco as partial Hessian using QM-A region                                                     |                                       |                                    |
| <b>g: OBS<sub>6</sub>-2BH<sub>26</sub></b>                                                                | 1.3                                   | 1.1                                |
| <b>i: OBS<sub>6</sub>-BH<sub>26</sub>-TH<sub>2</sub></b>                                                  | 0.2                                   | 0.0                                |
| <b>k: OBS<sub>6</sub>-DH<sub>2</sub></b>                                                                  | 0.0                                   | 0.2                                |
| Including the full QM-A region as partial Hessian using QM-A region                                       |                                       |                                    |
| <b>g: OBS<sub>6</sub>-2BH<sub>26</sub></b>                                                                | 1.3                                   | 1.3                                |
| <b>i: OBS<sub>6</sub>-BH<sub>26</sub>-TH<sub>2</sub></b>                                                  | 0.2                                   | 0.0                                |
| <b>k: OBS<sub>6</sub>-DH<sub>2</sub></b>                                                                  | 0.0                                   | 0.5                                |
| Including the full QM-B region as partial Hessian using QM-B region                                       |                                       |                                    |
| <b>g: OBS<sub>6</sub>-2BH<sub>26</sub></b>                                                                | 2.8                                   | 2.6                                |
| <b>i: OBS<sub>6</sub>-BH<sub>26</sub>-TH<sub>2</sub></b>                                                  | 3.1                                   | 2.6                                |
| <b>k: OBS<sub>6</sub>-DH<sub>2</sub></b>                                                                  | 0.0                                   | 0.0                                |

Note: The results were calculated using r<sup>2</sup>SCAN. The spin states and BS solutions of **OBS<sub>6</sub>-2BH<sub>26</sub>**, **OBS<sub>6</sub>-BH<sub>26</sub>-TH<sub>2</sub>**, and **OBS<sub>6</sub>-DH<sub>2</sub>** are BS347 ( $M_S = 1$ ), BS235 ( $M_S = 2$ ), and BS147 ( $M_S = 1$ ), respectively.



## 11. The results of the C3H model

Functionals with at least 20% HF exchange are known to predict interstitial carbide protonation in both  $E_3$  and  $E_4$  redox states, for example, B3LYP<sup>5,7,8</sup>. However, according to recent  $^{13}\text{C}$  ENDOR studies of multiple trapped FeMoco states, the carbide hyperfine coupling is practically unchanged, suggesting an unchanged carbide environment. Overall, the carbide is interpreted to as more likely having a stabilizing role during catalysis<sup>9</sup>.

Ryde and co-workers suggested a triply protonated model **C3H** (isomer **r**) can be favorable when calculated using B3LYP and TPSSh<sup>4</sup>. Their previous result showed that the low-energy spin state and BS solutions of this model are  $M_S = 1$  and BS136, belonging to the BS10 class<sup>5</sup>. We explored the **C3H** model using three spin states and 6 BS solutions (BS125, BS127, BS135, BS136, BS146, and BS147) in the BS10 class using our computational protocol at the  $r^2\text{SCAN}$  level. The results show that all five lowest-energy states (BS125, BS127, BS135, BS146, and BS147) are in  $M_S = 1$ , as shown in Table S32, and a previous study showed that BS136 with  $M_S = 1$  is the lowest-energy state when using B3LYP, therefore, we calculated all six BS solutions in the spin state of  $M_S = 1$  for other functionals (shown in Table S12 to Table S29).

The **C3H** model is higher than **OBS<sub>6</sub>-DH<sub>2</sub>** by 47.9 kcal/mol using  $r^2\text{SCAN}$  and QM-A region, shown in Table S32, which is very similar to the result reported by Ryde and co-workers<sup>4</sup>.

Table S32. The relative polarized QM and QM/MM energies for **C3H** model using  $r^2\text{SCAN}$  and QM-A region (kcal/mol).

|       | $M_S = 0$ |       | $M_S = 1$ |       | $M_S = 2$ |       |
|-------|-----------|-------|-----------|-------|-----------|-------|
|       | QM        | QM/MM | QM        | QM/MM | QM        | QM/MM |
| BS125 | 72.4      | 74.5  | 47.8      | 47.9  | 54.3      | 56.3  |
| BS127 | 57.9      | 60.5  | 49.9      | 50.5  | 53.9      | 56.1  |
| BS135 | 66.1      | 66.9  | 51.3      | 52.3  | 58.4      | 59.6  |
| BS136 | 55.8      | 58.5  | 52.6      | 54.7  | 56.2      | 58.1  |
| BS146 | 67.1      | 68.2  | 47.8      | 49.0  | 54.9      | 55.4  |
| BS147 | 57.8      | 60.9  | 50.4      | 51.5  | 55.6      | 51.6  |

## 12. The energies, spin populations of investigated models

Tables in this section shows the polarized QM energies, QM/MM energies and spin populations of metal ions of all investigated  $E_3$  models. The data in blue represent the lowest-energy state for each isomer.

Table S33. The relative polarized QM and QM/MM energies (kcal/mol) relative to the lowest-energy model (see Figure 2k in the manuscript) and Mulliken spin populations of Mo and 7 Fe ions for the **OBS<sub>2</sub>-2BH<sub>26</sub>** model.

| <b>OBS<sub>2</sub>-2BH<sub>26</sub> (<math>M_S = 2</math>), QM-A region, H-to-val, r<sup>2</sup>SCAN</b> |                                 |                          |       |       |       |       |       |       |       |       |
|----------------------------------------------------------------------------------------------------------|---------------------------------|--------------------------|-------|-------|-------|-------|-------|-------|-------|-------|
|                                                                                                          | $\Delta E(\text{polarized QM})$ | $\Delta E(\text{QM/MM})$ | Mo    | Fe1   | Fe2   | Fe3   | Fe4   | Fe5   | Fe6   | Fe7   |
| BS567                                                                                                    | 42.1                            | 44.3                     | 1.08  | 1.48  | 2.54  | 2.80  | 2.97  | -3.07 | -1.05 | -2.90 |
| BS234                                                                                                    | 20.1                            | 22.3                     | -1.12 | 3.34  | -0.51 | -3.05 | -3.00 | 2.95  | 2.16  | 2.89  |
| BS13                                                                                                     | 21.2                            | 24.9                     | -1.20 | -3.26 | 2.17  | -3.20 | 2.46  | 2.74  | 2.25  | 2.52  |
| BS14                                                                                                     | 21.1                            | 21.4                     | -1.23 | -3.27 | 1.96  | 2.41  | -3.19 | 2.70  | 2.48  | 2.68  |
| BS134                                                                                                    | 37.4                            | 38.0                     | -1.25 | -0.26 | 2.82  | -2.82 | -2.85 | 3.10  | 2.19  | 2.99  |
| BS256                                                                                                    | 29.9                            | 31.4                     | 0.20  | 3.12  | -3.16 | 1.60  | 3.08  | -2.91 | -1.15 | 2.71  |
| BS267                                                                                                    | 27.8                            | 31.7                     | 0.23  | 3.19  | -3.14 | 3.05  | 1.74  | 2.81  | -1.55 | -2.74 |
| BS357                                                                                                    | 20.2                            | 23.1                     | 0.36  | 3.50  | 3.03  | -3.00 | 3.35  | -2.82 | 1.79  | -2.73 |
| BS457                                                                                                    | 19.0                            | 24.5                     | 0.39  | 3.51  | 3.06  | 3.36  | -3.01 | -2.84 | 1.80  | -2.70 |
| BS157                                                                                                    | 17.3                            | 22.6                     | 0.36  | -3.26 | 3.16  | 3.30  | 3.18  | -2.68 | 2.23  | -2.44 |
| BS235                                                                                                    | 18.4                            | 21.0                     | -0.35 | 3.34  | -1.62 | -3.12 | 3.12  | -2.99 | 2.34  | 2.79  |
| BS247                                                                                                    | 20.7                            | 23.5                     | -0.27 | 3.32  | -1.73 | 3.09  | -3.08 | 2.89  | 2.37  | -2.91 |
| BS245                                                                                                    | 30.2                            | 32.7                     | -0.33 | 3.28  | -2.49 | 3.34  | -2.49 | -2.66 | 1.83  | 2.93  |
| BS246                                                                                                    | 15.1                            | 18.0                     | -0.43 | 3.29  | -3.04 | 2.91  | -3.14 | 2.88  | -1.65 | 2.72  |
| BS345                                                                                                    | 19.6                            | 22.2                     | -0.58 | 3.33  | 2.98  | -2.96 | -2.46 | -1.55 | 2.17  | 2.83  |
| BS347                                                                                                    | 19.1                            | 22.5                     | -0.57 | 3.34  | 3.00  | -2.54 | -2.96 | 2.95  | 2.10  | -1.38 |
| BS126                                                                                                    | 14.0                            | 18.3                     | -0.56 | -3.33 | -3.19 | 3.21  | 3.06  | 2.87  | -1.16 | 2.84  |
| BS137                                                                                                    | 26.9                            | 31.7                     | -0.41 | -3.24 | 3.01  | -2.40 | 3.26  | 3.15  | 2.29  | -1.85 |
| BS145                                                                                                    | 25.2                            | 28.2                     | -0.31 | -3.26 | 3.25  | 3.38  | -2.64 | -2.28 | 2.27  | 3.05  |
| BS127                                                                                                    | 25.8                            | 27.9                     | -0.36 | -3.33 | -1.16 | 3.02  | 3.19  | 2.98  | 2.40  | -2.76 |
| BS135                                                                                                    | 30.9                            | 30.6                     | -0.45 | -2.09 | 2.67  | -2.58 | 3.13  | -2.35 | 2.47  | 2.85  |
| BS147                                                                                                    | 23.1                            | 27.6                     | -0.38 | -3.27 | 3.32  | 3.31  | -2.69 | 2.99  | 2.38  | -2.05 |
|                                                                                                          |                                 |                          |       |       |       |       |       |       |       |       |
|                                                                                                          |                                 |                          |       |       |       |       |       |       |       |       |
| <b>OBS<sub>2</sub>-2BH<sub>26</sub> (<math>M_S = 1</math>), QM-A region, H-to-val, r<sup>2</sup>SCAN</b> |                                 |                          |       |       |       |       |       |       |       |       |
|                                                                                                          | $\Delta E(\text{polarized QM})$ | $\Delta E(\text{QM/MM})$ | Mo    | Fe1   | Fe2   | Fe3   | Fe4   | Fe5   | Fe6   | Fe7   |
| BS567                                                                                                    | 42.2                            | 42.9                     | 1.18  | 1.76  | 0.79  | 2.93  | 3.12  | -3.05 | -2.23 | -2.90 |
| BS234                                                                                                    | 19.0                            | 21.7                     | -1.11 | 3.34  | -2.66 | -2.82 | -2.73 | 3.06  | 1.47  | 2.96  |
| BS123                                                                                                    | 29.0                            | 32.4                     | -1.24 | -3.41 | -1.00 | -3.26 | 2.99  | 2.90  | 2.84  | 2.53  |
| BS124                                                                                                    | 30.7                            | 31.3                     | -1.24 | -3.32 | -0.88 | 2.89  | -3.22 | 2.65  | 2.78  | 2.79  |
| BS134                                                                                                    | 28.6                            | 29.5                     | -1.25 | -2.83 | 2.91  | -2.19 | -2.94 | 3.09  | 2.20  | 2.99  |
| BS267                                                                                                    | 37.0                            | 39.4                     | 0.19  | 0.10  | -3.06 | 3.08  | 2.89  | 2.84  | -1.55 | -2.80 |
| BS357                                                                                                    | 24.0                            | 25.0                     | 0.47  | 3.34  | 2.40  | -3.15 | 3.03  | -2.96 | 1.65  | -2.75 |
| BS2367                                                                                                   | 26.0                            | 27.8                     | 0.10  | 3.31  | -2.16 | -2.69 | 3.29  | 2.80  | -1.10 | -2.29 |
| BS456                                                                                                    | 39.0                            | 40.6                     | 0.30  | 3.17  | 1.32  | 2.13  | -2.93 | -2.87 | -2.38 | 2.81  |
| BS156                                                                                                    | 28.0                            | 30.5                     | 0.30  | -3.35 | 2.53  | 2.08  | 2.70  | -2.93 | -1.64 | 2.39  |
| BS157                                                                                                    | 11.6                            | 15.7                     | 0.27  | -3.37 | 2.20  | 3.03  | 2.99  | -2.69 | 2.45  | -2.57 |
| BS167                                                                                                    | 27.1                            | 29.9                     | 0.31  | -3.35 | 2.38  | 2.67  | 2.22  | 2.62  | -1.73 | -2.84 |
| BS346                                                                                                    | 24.3                            | 27.3                     | -0.34 | 3.32  | 1.55  | -3.03 | -2.97 | 2.89  | -2.42 | 2.69  |

|                                                                                                       |                                 |                          |       |       |       |       |       |       |       |       |
|-------------------------------------------------------------------------------------------------------|---------------------------------|--------------------------|-------|-------|-------|-------|-------|-------|-------|-------|
| BS246                                                                                                 | 21.9                            | 26.9                     | -0.12 | 3.30  | -3.02 | 2.70  | -3.16 | 2.61  | -2.06 | 1.50  |
| BS345                                                                                                 | 9.8                             | 14.2                     | -0.20 | 3.35  | 3.18  | -3.11 | -2.89 | -2.78 | 1.41  | 2.78  |
| BS126                                                                                                 | 18.9                            | 23.9                     | -0.32 | -3.34 | -3.23 | 3.02  | 3.05  | 2.39  | -1.61 | 1.97  |
| BS137                                                                                                 | 20.8                            | 24.8                     | -0.38 | -3.27 | 2.62  | -2.94 | 3.14  | 3.03  | 2.41  | -2.45 |
| BS145                                                                                                 | 20.0                            | 23.2                     | -0.40 | -3.27 | 2.48  | 3.23  | -2.86 | -2.54 | 2.46  | 2.94  |
| BS135                                                                                                 | 13.0                            | 15.5                     | -0.45 | -3.29 | 2.76  | -3.07 | 3.15  | -2.32 | 2.40  | 2.85  |
| BS147                                                                                                 | 10.5                            | 14.2                     | -0.43 | -3.32 | 2.99  | 3.19  | -3.14 | 2.95  | 2.24  | -2.30 |
|                                                                                                       |                                 |                          |       |       |       |       |       |       |       |       |
| <b>OBS<sub>2</sub>-2BH<sub>26</sub> (M<sub>S</sub> = 0), QM-A region, H-to-val, r<sup>2</sup>SCAN</b> |                                 |                          |       |       |       |       |       |       |       |       |
|                                                                                                       | $\Delta E(\text{polarized QM})$ | $\Delta E(\text{QM/MM})$ | Mo    | Fe1   | Fe2   | Fe3   | Fe4   | Fe5   | Fe6   | Fe7   |
| BS2346                                                                                                | 13.6                            | 16.1                     | -0.63 | 3.35  | -2.52 | -2.83 | -2.82 | 2.95  | -0.96 | 2.84  |
| BS123                                                                                                 | 28.0                            | 31.3                     | -1.13 | -3.34 | -2.42 | -3.09 | 3.12  | 2.95  | 1.22  | 2.77  |
| BS134                                                                                                 | 23.8                            | 26.1                     | -1.18 | -3.27 | 2.85  | -3.08 | -3.09 | 3.03  | 2.18  | 2.90  |
| BS2567                                                                                                | 23.7                            | 26.0                     | 1.16  | 3.28  | -2.91 | 3.10  | 3.10  | -3.03 | -2.12 | -2.90 |
| BS2356                                                                                                | 11.4                            | 13.3                     | 0.33  | 3.32  | -2.37 | -3.11 | 3.13  | -2.87 | -1.91 | 2.84  |
| BS2356<br>(H-to-Cys)                                                                                  | 12.7                            | 14.2                     | 0.34  | 3.32  | -2.34 | -3.11 | 3.13  | -2.87 | -1.96 | 2.84  |
| BS2467                                                                                                | 10.7                            | 14.1                     | 0.32  | 3.30  | -2.58 | 3.10  | -3.09 | 2.94  | -1.65 | -2.74 |
| BS357                                                                                                 | 29.7                            | 30.8                     | 0.39  | 3.27  | -0.31 | -3.24 | 3.18  | -2.96 | 2.50  | -2.84 |
| BS2367                                                                                                | 17.6                            | 21.8                     | 0.14  | 3.30  | -3.12 | -3.12 | 3.07  | 2.67  | -0.75 | -2.48 |
| BS2456                                                                                                | 19.9                            | 23.7                     | 0.13  | 3.29  | -3.07 | 3.11  | -3.13 | -2.63 | -0.50 | 2.47  |
| BS457                                                                                                 | 35.1                            | 36.2                     | 0.65  | 3.21  | 2.52  | 1.89  | -3.18 | -2.97 | 1.01  | -2.85 |
| BS1256                                                                                                | 14.9                            | 16.6                     | 0.16  | -3.31 | -2.20 | 3.24  | 3.16  | -2.83 | -1.56 | 2.85  |
| BS157                                                                                                 | 13.4                            | 16.0                     | 0.63  | -3.36 | 2.59  | 2.85  | 2.82  | -2.94 | 0.83  | -2.83 |
| BS1267                                                                                                | 12.4                            | 15.3                     | 0.17  | -3.32 | -2.22 | 3.19  | 3.22  | 2.96  | -1.62 | -2.70 |
| BS345                                                                                                 | 12.4                            | 15.5                     | -0.18 | 3.32  | 2.28  | -3.18 | -3.21 | -2.92 | 1.50  | 2.70  |
| BS126                                                                                                 | 30.6                            | 35.1                     | -0.14 | -3.29 | -3.15 | 2.51  | 2.11  | 2.43  | -2.12 | 1.79  |
| BS137                                                                                                 | 19.6                            | 23.6                     | -0.15 | -3.28 | 3.10  | -3.10 | 3.13  | 2.67  | 0.38  | -2.47 |
| BS145                                                                                                 | 17.4                            | 21.8                     | -0.15 | -3.30 | 3.15  | 3.14  | -3.07 | -2.64 | 0.59  | 2.50  |
| BS135                                                                                                 | 10.8                            | 14.2                     | -0.34 | -3.29 | 2.59  | -3.09 | 3.08  | -2.93 | 1.64  | 2.72  |
| BS136                                                                                                 | 31.2                            | 34.4                     | -0.34 | -3.29 | 1.66  | -3.14 | 2.94  | 2.20  | -2.43 | 2.66  |
| BS147                                                                                                 | 12.5                            | 14.2                     | -0.36 | -3.31 | 2.30  | 3.11  | -3.13 | 2.87  | 2.02  | -2.83 |
|                                                                                                       |                                 |                          |       |       |       |       |       |       |       |       |
| <b>OBS<sub>2</sub>-2BH<sub>26</sub> (M<sub>S</sub> = 0), QM-C region, r<sup>2</sup>SCAN</b>           |                                 |                          |       |       |       |       |       |       |       |       |
|                                                                                                       |                                 |                          |       |       |       |       |       |       |       |       |
| BS2356                                                                                                | 16.7                            | 15.9                     | 0.32  | 3.30  | -2.34 | -3.11 | 3.13  | -2.87 | -1.95 | 2.87  |

Table S34. The relative polarized QM and QM/MM energies (kcal/mol) relative to the lowest-energy model (see Figure 2k in the manuscript) and Mulliken spin populations of Mo and 7 Fe ions for the **OBS<sub>6</sub>-2BH<sub>26</sub>** model.

| <b>OBS<sub>6</sub>-2BH<sub>26</sub> (M<sub>S</sub> = 2), QM-A region, H-to-homo, r<sup>2</sup>SCAN</b> |                                 |                          |       |       |       |       |       |       |       |       |
|--------------------------------------------------------------------------------------------------------|---------------------------------|--------------------------|-------|-------|-------|-------|-------|-------|-------|-------|
|                                                                                                        | $\Delta E(\text{polarized QM})$ | $\Delta E(\text{QM/MM})$ | Mo    | Fe1   | Fe2   | Fe3   | Fe4   | Fe5   | Fe6   | Fe7   |
| BS2567                                                                                                 | 18.2                            | 21.4                     | 0.93  | 3.51  | -2.31 | 3.51  | 3.34  | -2.68 | -1.37 | -2.36 |
| BS234                                                                                                  | 8.6                             | 11.5                     | -1.25 | 3.36  | -1.66 | -2.91 | -2.93 | 2.97  | 2.75  | 2.82  |
| BS13                                                                                                   | 5.0                             | 8.1                      | -1.05 | -3.24 | 2.47  | -3.23 | 2.60  | 2.82  | 1.47  | 2.54  |
| BS14                                                                                                   | 5.6                             | 7.2                      | -1.06 | -3.27 | 2.42  | 2.61  | -3.23 | 2.74  | 1.56  | 2.70  |
| BS134                                                                                                  | 28.9                            | 29.3                     | -1.10 | -0.64 | 3.15  | -2.59 | -2.84 | 3.14  | 1.45  | 3.02  |

|       |      |      |       |       |       |       |       |       |       |       |
|-------|------|------|-------|-------|-------|-------|-------|-------|-------|-------|
| BS356 | 18.1 | 19.2 | 0.07  | 3.19  | 1.04  | -3.16 | 3.07  | -3.00 | -0.23 | 2.74  |
| BS467 | 21.6 | 23.4 | 0.05  | 3.25  | 0.88  | 3.01  | -3.14 | 2.90  | -0.24 | -2.86 |
| BS256 | 13.6 | 15.4 | 0.44  | 3.24  | -2.76 | 2.42  | 3.04  | -3.00 | -2.53 | 2.57  |
| BS267 | 15.4 | 16.6 | 0.40  | 3.21  | -2.60 | 2.61  | 3.03  | 2.76  | -2.97 | -2.83 |
| BS357 | 15.3 | 17.1 | 0.20  | 3.38  | 2.82  | -3.05 | 3.19  | -2.71 | 1.69  | -1.69 |
| BS457 | 11.5 | 13.5 | 0.22  | 3.38  | 1.82  | 3.22  | -3.02 | -2.43 | 3.15  | -2.73 |
| BS15  | 8.3  | 11.8 | 0.10  | -3.39 | 2.66  | 3.03  | 2.88  | -2.93 | 0.02  | 1.97  |
| BS157 | 8.5  | 9.4  | 0.27  | -2.87 | 2.56  | 3.25  | 3.23  | -2.76 | 2.86  | -2.63 |
| BS167 | 8.9  | 13.1 | 0.12  | -3.39 | 2.64  | 2.86  | 2.95  | 2.24  | -0.06 | -2.84 |
| BS34  | 15.4 | 17.2 | -0.90 | 3.27  | 1.76  | -3.13 | -3.06 | 2.80  | 0.37  | 2.64  |
| BS236 | 5.6  | 6.7  | -0.43 | 3.24  | -1.90 | -3.11 | 3.09  | 2.75  | -3.11 | 2.82  |
| BS246 | 8.9  | 11.9 | -0.18 | 3.26  | -2.63 | 3.08  | -3.06 | 2.85  | -1.75 | 1.62  |
| BS345 | 7.9  | 9.8  | -0.53 | 3.29  | 2.44  | -2.80 | -2.36 | -2.55 | 3.12  | 2.90  |
| BS347 | 7.2  | 9.6  | -0.53 | 3.28  | 2.46  | -2.30 | -2.84 | 3.00  | 3.04  | -2.43 |
| BS126 | 10.5 | 12.5 | -0.74 | -3.29 | -3.03 | 2.77  | 2.73  | 2.98  | -0.65 | 2.87  |
| BS137 | 14.6 | 17.0 | -0.75 | -3.27 | 2.52  | -2.58 | 3.22  | 3.15  | 3.28  | -1.87 |
| BS145 | 14.7 | 16.4 | -0.69 | -3.28 | 2.64  | 3.31  | -2.70 | -2.00 | 3.24  | 3.04  |
| BS147 | 17.7 | 17.7 | -0.50 | -1.81 | 2.67  | 3.09  | -2.66 | 2.99  | 2.82  | -2.80 |
|       |      |      |       |       |       |       |       |       |       |       |

**OBS<sub>6</sub>-2BH<sub>26</sub> (M<sub>S</sub> = 1), QM-A region, H-to-homo, r<sup>2</sup>SCAN**

|                     | $\Delta E(\text{polarized QM})$ | $\Delta E(\text{QM/MM})$ | Mo    | Fe1   | Fe2   | Fe3   | Fe4   | Fe5   | Fe6   | Fe7   |
|---------------------|---------------------------------|--------------------------|-------|-------|-------|-------|-------|-------|-------|-------|
| BS2567              | 11.1                            | 14.1                     | 0.95  | 3.36  | -2.99 | 3.32  | 3.29  | -2.80 | -1.32 | -2.54 |
| BS234               | 10.3                            | 12.6                     | -0.99 | 3.34  | -2.50 | -2.56 | -2.83 | 3.09  | 0.53  | 3.07  |
| BS134               | 19.2                            | 19.9                     | -1.11 | -2.98 | 3.08  | -1.65 | -2.96 | 3.12  | 1.42  | 2.99  |
| BS2356              | 8.1                             | 10.2                     | -0.14 | 3.30  | -2.79 | -3.01 | 3.21  | -2.03 | -0.36 | 2.89  |
| BS2467              | 6.6                             | 10.0                     | -0.07 | 3.27  | -2.72 | 3.22  | -2.98 | 2.98  | -0.70 | -1.75 |
| BS357               | 10.9                            | 11.2                     | 0.21  | 3.31  | 1.62  | -3.18 | 3.00  | -3.01 | 3.06  | -2.92 |
| BS2367              | 14.0                            | 16.7                     | 0.00  | 3.30  | -2.65 | -2.88 | 3.19  | 3.02  | -0.57 | -2.13 |
| BS457               | 11.9                            | 14.1                     | 0.25  | 3.31  | 1.45  | 3.00  | -3.08 | -3.01 | 3.05  | -2.85 |
| BS157               | 3.4                             | 7.5                      | 0.32  | -3.40 | 2.98  | 3.23  | 3.06  | -2.67 | 1.45  | -2.44 |
| BS167               | 8.3                             | 11.6                     | 0.50  | -3.34 | 2.22  | 2.90  | 3.04  | 2.74  | -2.87 | -2.72 |
| BS235               | 5.2                             | 8.0                      | -0.19 | 3.34  | -2.66 | -3.03 | 3.19  | -2.81 | 0.69  | 2.83  |
| BS236               | 10.4                            | 11.3                     | -0.08 | 3.30  | -2.52 | -3.18 | 2.79  | 1.84  | -3.08 | 2.64  |
| BS245               | 14.0                            | 17.3                     | -0.18 | 3.29  | -2.84 | 3.24  | -3.11 | -2.69 | 0.98  | 2.78  |
| BS246               | 9.6                             | 12.5                     | -0.03 | 3.26  | -2.48 | 2.77  | -3.13 | 2.77  | -3.09 | 1.67  |
| BS345               | 0.1                             | 1.9                      | -0.46 | 3.33  | 2.22  | -3.15 | -3.12 | -2.85 | 3.10  | 2.82  |
| BS347               | -0.8                            | 1.3                      | -0.44 | 3.33  | 2.26  | -3.17 | -3.13 | 2.94  | 3.01  | -2.75 |
| BS347<br>(H-to-hyd) | -0.1                            | 1.7                      | -0.44 | 3.34  | 2.23  | -3.16 | -3.13 | 2.94  | 3.07  | -2.76 |
| BS126               | 6.6                             | 8.7                      | -0.33 | -3.32 | -2.33 | 2.72  | 2.81  | 2.88  | -3.11 | 2.64  |
| BS137               | 8.8                             | 12.0                     | -0.43 | -3.26 | 2.90  | -2.97 | 3.20  | 3.02  | 1.79  | -2.12 |
| BS145               | 8.5                             | 11.1                     | -0.38 | -3.29 | 2.89  | 3.28  | -3.00 | -2.37 | 1.98  | 2.90  |
| BS136               | 15.8                            | 17.9                     | -0.53 | -3.23 | 2.26  | -3.22 | 2.55  | 2.85  | -0.99 | 2.59  |
| BS146               | 17.5                            | 17.8                     | -0.55 | -3.26 | 2.05  | 2.57  | -3.23 | 2.81  | -0.82 | 2.70  |
| BS147               | 2.8                             | 4.3                      | -0.56 | -3.30 | 2.60  | 3.12  | -3.06 | 3.04  | 3.12  | -2.76 |
|                     |                                 |                          |       |       |       |       |       |       |       |       |

**OBS<sub>6</sub>-2BH<sub>26</sub> (M<sub>S</sub> = 0), QM-A region, H-to-homo, r<sup>2</sup>SCAN**

|                                                                                                | $\Delta E(\text{polarized QM})$ | $\Delta E(\text{QM/MM})$ | Mo    | Fe1   | Fe2   | Fe3   | Fe4   | Fe5   | Fe6   | Fe7   |
|------------------------------------------------------------------------------------------------|---------------------------------|--------------------------|-------|-------|-------|-------|-------|-------|-------|-------|
| BS2567                                                                                         | 12.2                            | 14.6                     | 1.08  | 3.41  | -3.08 | 3.00  | 2.92  | -3.16 | -1.48 | -2.88 |
| BS2346                                                                                         | 2.0                             | 4.9                      | -0.59 | 3.38  | -2.82 | -2.88 | -2.87 | 3.03  | -1.13 | 2.92  |
| BS1236                                                                                         | 20.4                            | 22.6                     | -0.70 | -3.11 | -2.02 | -3.04 | 3.13  | 2.99  | -0.42 | 2.83  |
| BS134                                                                                          | 12.2                            | 14.6                     | -1.09 | -3.43 | 3.11  | -3.00 | -2.89 | 3.15  | 1.43  | 2.88  |
| BS2356                                                                                         | -1.0                            | 1.6                      | 0.28  | 3.32  | -2.78 | -3.02 | 3.18  | -3.00 | -1.39 | 2.73  |
| BS1267                                                                                         | 7.6                             | 9.6                      | 0.05  | -3.32 | -2.97 | 3.24  | 3.24  | 3.10  | -0.74 | -2.79 |
| BS2367                                                                                         | 8.5                             | 11.1                     | 0.19  | 3.31  | -3.04 | -3.15 | 3.17  | 2.77  | -0.88 | -2.78 |
| BS2456                                                                                         | 9.3                             | 12.2                     | 0.42  | 3.26  | -2.50 | 3.27  | -2.90 | -2.96 | -1.83 | 2.57  |
| BS457                                                                                          | 19.4                            | 21.6                     | 0.67  | 2.71  | 2.76  | 2.64  | -3.12 | -3.00 | 0.70  | -2.89 |
| BS1256                                                                                         | 8.8                             | 11.1                     | 0.04  | -3.31 | -2.98 | 3.30  | 3.20  | -2.92 | -0.67 | 3.01  |
| BS157                                                                                          | 1.7                             | 4.9                      | 0.63  | -3.39 | 2.95  | 2.91  | 2.89  | -3.03 | 0.86  | -2.92 |
| BS2467                                                                                         | -0.1                            | 2.8                      | 0.31  | 3.28  | -2.80 | 3.20  | -3.00 | 2.80  | -1.36 | -2.88 |
| BS346                                                                                          | 9.9                             | 11.9                     | -0.17 | 3.31  | 1.46  | -3.23 | -3.17 | 2.64  | -3.35 | 2.70  |
| BS345                                                                                          | 7.5                             | 9.6                      | -0.06 | 3.32  | 3.01  | -3.24 | -3.24 | -3.09 | 0.67  | 2.80  |
| BS347                                                                                          | 8.9                             | 11.1                     | -0.05 | 3.31  | 3.01  | -3.29 | -3.20 | 2.92  | 0.62  | -3.00 |
| BS126                                                                                          | 15.6                            | 17.5                     | 0.00  | -3.30 | -2.57 | 2.69  | 2.51  | 2.12  | -3.07 | 1.82  |
| BS137                                                                                          | 8.9                             | 11.9                     | -0.31 | -3.28 | 2.93  | -3.26 | 3.06  | 2.99  | 1.08  | -2.65 |
| BS145                                                                                          | 8.2                             | 11.0                     | -0.22 | -3.31 | 3.05  | 3.16  | -3.18 | -2.77 | 0.86  | 2.81  |
| BS135                                                                                          | 0.0                             | 2.9                      | -0.31 | -3.28 | 2.85  | -3.19 | 3.00  | -2.79 | 1.27  | 2.89  |
| BS147                                                                                          | -1.1                            | 1.6                      | -0.27 | -3.32 | 2.86  | 3.02  | -3.18 | 3.00  | 1.26  | -2.73 |
|                                                                                                |                                 |                          |       |       |       |       |       |       |       |       |
| <b>OBS<sub>6</sub>-2BH<sub>26</sub> (<math>M_S = 1</math>), QM-C region, r<sup>2</sup>SCAN</b> |                                 |                          |       |       |       |       |       |       |       |       |
| BS347                                                                                          | 2.4                             | 3.1                      | -0.43 | 3.33  | 2.23  | -3.15 | -3.11 | 2.94  | 2.98  | -2.70 |

Table S35. The relative polarized QM and QM/MM energies (kcal/mol) relative to the lowest-energy model (see Figure 2k in the manuscript) and Mulliken spin populations of Mo and 7 Fe ions for the **OBS<sub>6</sub>-BH<sub>26</sub>-TH<sub>2</sub>** model.

| <b>OBS<sub>6</sub>-BH<sub>26</sub>-TH<sub>2</sub> (<math>M_S = 2</math>), QM-A region, H-to-homo, r<sup>2</sup>SCAN</b> |                                 |                          |       |       |       |       |       |       |       |       |
|-------------------------------------------------------------------------------------------------------------------------|---------------------------------|--------------------------|-------|-------|-------|-------|-------|-------|-------|-------|
|                                                                                                                         | $\Delta E(\text{polarized QM})$ | $\Delta E(\text{QM/MM})$ | Mo    | Fe1   | Fe2   | Fe3   | Fe4   | Fe5   | Fe6   | Fe7   |
| BS567                                                                                                                   | 26.7                            | 30.1                     | 1.18  | 3.25  | 1.13  | 3.29  | 3.19  | -3.01 | -2.65 | -2.80 |
| BS234                                                                                                                   | 3.9                             | 6.2                      | -1.19 | 3.31  | -2.11 | -2.80 | -2.77 | 3.09  | 2.63  | 3.00  |
| BS134                                                                                                                   | 23.0                            | 23.3                     | -1.25 | -3.08 | 2.77  | -1.10 | -2.86 | 3.08  | 3.23  | 3.06  |
| BS257                                                                                                                   | 16.1                            | 17.4                     | 0.36  | 2.79  | -2.57 | 2.31  | 3.09  | -2.83 | 3.07  | -2.68 |
| BS356                                                                                                                   | 8.5                             | 10.3                     | 0.34  | 3.35  | 2.37  | -3.13 | 3.01  | -2.84 | -2.29 | 2.82  |
| BS467                                                                                                                   | 11.2                            | 14.4                     | 0.37  | 3.33  | 2.33  | 3.02  | -3.11 | 2.92  | -2.33 | -2.67 |
| BS256                                                                                                                   | 16.1                            | 17.3                     | 0.43  | 3.13  | -2.74 | 2.48  | 3.09  | -2.98 | -2.52 | 2.66  |
| BS357                                                                                                                   | 12.6                            | 15.0                     | 0.19  | 3.34  | 2.27  | -3.11 | 3.17  | -2.84 | 2.87  | -2.21 |
| BS367                                                                                                                   | 21.1                            | 25.1                     | 0.45  | 3.43  | 2.60  | -3.17 | 3.18  | 2.82  | -2.91 | -2.69 |
| BS456                                                                                                                   | 14.6                            | 18.9                     | 0.50  | 3.51  | 2.52  | 3.39  | -3.12 | -2.85 | -3.02 | 2.60  |
| BS457                                                                                                                   | 15.1                            | 17.6                     | 0.22  | 3.30  | 2.04  | 3.26  | -3.05 | -2.39 | 2.94  | -2.63 |
| BS156                                                                                                                   | 5.4                             | 7.8                      | 0.20  | -3.34 | 2.34  | 3.21  | 2.98  | -2.66 | -1.76 | 2.99  |
| BS157                                                                                                                   | 2.9                             | 6.1                      | 0.22  | -3.29 | 2.59  | 3.23  | 3.15  | -2.56 | 3.05  | -2.38 |
| BS167                                                                                                                   | 4.7                             | 8.2                      | 0.19  | -3.34 | 2.31  | 3.03  | 3.16  | 3.08  | -1.79 | -2.52 |
| BS235                                                                                                                   | -0.9                            | 1.2                      | -0.39 | 3.30  | -2.28 | -3.03 | 3.13  | -2.89 | 2.76  | 2.71  |
| BS235<br>(H-to-hyd)                                                                                                     | -2.2                            | 0.2                      | -0.37 | 3.29  | -2.24 | -3.03 | 3.13  | -2.90 | 2.71  | 2.74  |



|       |      |      |       |       |       |       |       |       |       |       |
|-------|------|------|-------|-------|-------|-------|-------|-------|-------|-------|
| BS247 | -1.9 | 1.7  | -0.33 | 3.27  | -2.29 | 3.13  | -3.00 | 2.85  | 2.76  | -2.82 |
| BS346 | 3.8  | 6.2  | -0.30 | 3.32  | 2.89  | -2.96 | -2.93 | 2.91  | -2.24 | 2.76  |
| BS236 | 3.9  | 5.5  | -0.38 | 3.25  | -2.42 | -3.14 | 3.16  | 2.94  | -2.98 | 2.86  |
| BS237 | 3.4  | 6.1  | -0.48 | 3.27  | -2.45 | -3.19 | 3.13  | 2.89  | 2.95  | -2.60 |
| BS245 | 6.5  | 9.0  | -0.45 | 3.24  | -2.38 | 3.14  | -3.12 | -2.69 | 2.95  | 2.72  |
| BS246 | 4.6  | 7.1  | -0.38 | 3.22  | -2.38 | 3.15  | -3.08 | 2.97  | -2.96 | 2.84  |
| BS345 | 8.2  | 10.3 | -0.42 | 3.27  | 2.87  | -2.93 | -2.36 | -2.55 | 2.74  | 2.93  |
| BS347 | 8.6  | 10.7 | -0.43 | 3.27  | 2.90  | -2.40 | -2.97 | 3.06  | 2.70  | -2.44 |
| BS126 | 3.7  | 6.0  | -0.29 | -3.29 | -2.68 | 3.22  | 3.20  | 3.02  | -2.67 | 2.91  |
| BS137 | 10.4 | 13.3 | -0.53 | -3.22 | 2.70  | -2.47 | 3.19  | 3.10  | 3.13  | -2.12 |
| BS145 | 10.4 | 12.3 | -0.47 | -3.25 | 2.80  | 3.28  | -2.59 | -2.27 | 3.14  | 2.99  |
| BS125 | 8.9  | 9.4  | -0.46 | -3.29 | -2.13 | 3.25  | 3.08  | -2.89 | 3.07  | 2.94  |
| BS17  | 10.7 | 13.4 | -0.36 | -3.29 | -0.14 | 2.91  | 3.01  | 2.41  | 2.54  | -2.83 |
| BS135 | 11.8 | 14.0 | 0.74  | -3.22 | 2.68  | -2.96 | 3.13  | -2.87 | 3.35  | 2.95  |
| BS136 | 14.3 | 15.8 | -0.51 | -3.22 | 2.82  | -3.03 | 3.26  | 3.13  | -1.72 | 2.91  |
| BS146 | 22.6 | 23.3 | -0.31 | -1.96 | 2.45  | 3.22  | -2.74 | 2.89  | -2.81 | 2.96  |
| BS147 | 15.9 | 17.5 | -0.44 | -1.90 | 2.56  | 3.05  | -2.69 | 2.98  | 3.04  | -2.74 |
|       |      |      |       |       |       |       |       |       |       |       |

**OBS<sub>6</sub>-BH<sub>26</sub>-TH<sub>2</sub> (M<sub>s</sub> = 1), QM-A region, H-to-homo, r<sup>2</sup>SCAN**

|        | $\Delta E(\text{polarized QM})$ | $\Delta E(\text{QM/MM})$ | Mo    | Fe1   | Fe2   | Fe3   | Fe4   | Fe5   | Fe6   | Fe7   |
|--------|---------------------------------|--------------------------|-------|-------|-------|-------|-------|-------|-------|-------|
| BS1567 | 36.2                            | 37.2                     | 1.12  | -0.81 | 2.60  | 3.45  | 3.04  | -2.89 | -2.48 | -2.47 |
| BS234  | 1.9                             | 5.8                      | -1.00 | 3.34  | -2.31 | -3.19 | -2.96 | 2.89  | 2.46  | 2.27  |
| BS123  | 14.4                            | 16.8                     | -1.23 | -3.35 | -2.42 | -3.09 | 3.21  | 3.04  | 2.72  | 2.83  |
| BS124  | 13.4                            | 15.1                     | -1.24 | -3.31 | -2.44 | 3.21  | -3.05 | 3.00  | 2.67  | 2.92  |
| BS134  | 22.1                            | 23.1                     | -1.10 | -2.86 | 2.75  | -2.05 | -2.99 | 3.00  | 2.60  | 2.63  |
| BS356  | 10.0                            | 12.7                     | 0.41  | 3.18  | 0.78  | -3.10 | 3.13  | -2.85 | -2.62 | 2.76  |
| BS467  | 13.1                            | 15.6                     | 0.46  | 3.14  | 0.79  | 3.12  | -3.07 | 2.86  | -2.67 | -2.70 |
| BS256  | 18.2                            | 18.9                     | 0.40  | 3.17  | -2.70 | 0.80  | 3.06  | -3.04 | -2.85 | 2.63  |
| BS267  | 20.3                            | 21.8                     | 0.40  | 3.12  | -2.71 | 3.02  | 0.86  | 2.70  | -2.80 | -2.91 |
| BS367  | 17.9                            | 18.7                     | 0.34  | 3.00  | 1.28  | -3.09 | 3.15  | 2.82  | -2.99 | -2.54 |
| BS456  | 19.6                            | 21.8                     | 0.40  | 3.04  | 1.28  | 3.21  | -3.07 | -2.78 | -2.96 | 2.70  |
| BS156  | -0.8                            | 2.5                      | 0.42  | -3.32 | 2.21  | 3.06  | 2.90  | -2.84 | -2.73 | 2.57  |
| BS157  | -0.6                            | 2.5                      | 0.29  | -3.34 | 2.03  | 3.09  | 2.98  | -2.81 | 2.89  | -2.70 |
| BS167  | -0.2                            | 2.6                      | 0.42  | -3.33 | 2.20  | 2.94  | 3.02  | 2.69  | -2.74 | -2.72 |
| BS235  | 17.0                            | 18.5                     | -0.43 | 1.92  | -2.32 | -3.00 | 2.88  | -2.86 | 2.73  | 2.73  |
| BS247  | 6.7                             | 8.4                      | -0.24 | 3.23  | -2.69 | 3.07  | -3.04 | 2.82  | 1.51  | -2.89 |
| BS346  | 0.5                             | 2.2                      | -0.39 | 3.29  | 2.40  | -3.02 | -3.00 | 2.88  | -3.09 | 2.77  |
| BS236  | 9.7                             | 11.2                     | -0.20 | 3.25  | -2.69 | -3.26 | 2.79  | 2.29  | -2.98 | 2.58  |
| BS237  | 11.9                            | 13.3                     | -0.29 | 3.27  | -3.02 | -3.21 | 2.99  | 2.87  | 1.99  | -2.82 |
| BS245  | 15.8                            | 19.1                     | -0.13 | 3.25  | -2.41 | 2.88  | -3.15 | -2.73 | 2.71  | 1.31  |
| BS246  | 11.2                            | 14.2                     | -0.11 | 3.23  | -2.55 | 2.73  | -3.15 | 2.74  | -2.98 | 1.89  |
| BS347  | 1.5                             | 3.9                      | -0.31 | 3.32  | 2.84  | -3.16 | -3.12 | 2.91  | 2.32  | -2.69 |
| BS126  | 9.8                             | 12.4                     | -0.22 | -3.30 | -2.68 | 3.05  | 3.09  | 2.55  | -2.78 | 2.13  |
| BS137  | 6.9                             | 10.0                     | -0.47 | -3.22 | 2.53  | -3.17 | 3.15  | 3.01  | 2.84  | -2.54 |
| BS145  | 7.4                             | 8.7                      | -0.47 | -3.26 | 2.61  | 3.21  | -3.15 | -2.67 | 2.87  | 2.89  |
| BS125  | 5.9                             | 9.1                      | -0.41 | -3.29 | -2.69 | 3.10  | 2.95  | -2.85 | 2.54  | 2.41  |
| BS127  | 6.0                             | 8.4                      | -0.42 | -3.30 | -2.70 | 2.98  | 3.10  | 2.72  | 2.34  | -2.78 |

|                                                                                                                      |                                 |                          |       |       |       |       |       |       |       |       |
|----------------------------------------------------------------------------------------------------------------------|---------------------------------|--------------------------|-------|-------|-------|-------|-------|-------|-------|-------|
| BS135                                                                                                                | 1.3                             | 3.6                      | -0.50 | -3.23 | 2.62  | -3.03 | 3.06  | -2.82 | 3.06  | 2.86  |
| BS136                                                                                                                | 5.2                             | 8.5                      | -0.33 | -3.25 | 2.39  | -3.05 | 3.18  | 3.09  | -2.85 | 2.82  |
| BS146                                                                                                                | 5.1                             | 7.1                      | -0.31 | -3.28 | 2.42  | 3.27  | -3.05 | 2.92  | -2.87 | 2.97  |
| BS147                                                                                                                | -0.3                            | 2.0                      | -0.45 | -3.26 | 2.64  | 3.09  | -3.03 | 2.97  | 3.03  | -2.74 |
|                                                                                                                      |                                 |                          |       |       |       |       |       |       |       |       |
| <b>OBS<sub>6</sub>-BH<sub>26</sub>-TH<sub>2</sub> (M<sub>S</sub> = 0), QM-A region, H-to-homo, r<sup>2</sup>SCAN</b> |                                 |                          |       |       |       |       |       |       |       |       |
|                                                                                                                      | $\Delta E(\text{polarized QM})$ | $\Delta E(\text{QM/MM})$ | Mo    | Fe1   | Fe2   | Fe3   | Fe4   | Fe5   | Fe6   | Fe7   |
| BS1567                                                                                                               | 10.8                            | 14.2                     | 1.01  | -3.32 | 2.34  | 3.25  | 3.22  | -2.21 | -1.94 | -2.09 |
| BS234                                                                                                                | 11.0                            | 14.3                     | -0.98 | 3.32  | -2.35 | -3.24 | -3.21 | 2.20  | 1.91  | 2.08  |
| BS123                                                                                                                | 19.1                            | 22.4                     | -1.16 | -3.52 | -2.56 | -3.32 | 3.14  | 2.97  | 2.22  | 2.53  |
| BS124                                                                                                                | 20.2                            | 20.5                     | -1.12 | -3.35 | -2.51 | 2.99  | -3.14 | 2.84  | 1.70  | 2.61  |
| BS134                                                                                                                | 15.7                            | 15.7                     | -1.03 | -3.34 | 2.82  | -3.20 | -3.19 | 2.84  | 2.90  | 2.51  |
| BS257                                                                                                                | 6.0                             | 8.1                      | 0.33  | -3.31 | -0.04 | 3.00  | 2.91  | -2.89 | 3.05  | -2.72 |
| BS2356                                                                                                               | 2.1                             | 4.3                      | 0.39  | 3.29  | -2.22 | -2.91 | 3.13  | -2.78 | -2.32 | 2.84  |
| BS2467                                                                                                               | 3.5                             | 6.3                      | 0.37  | 3.23  | -2.36 | 3.14  | -2.90 | 2.91  | -1.92 | -2.86 |
| BS2357                                                                                                               | 5.3                             | 7.4                      | 0.11  | 3.28  | -2.20 | -2.95 | 3.12  | -2.71 | 2.96  | -2.06 |
| BS2367                                                                                                               | 11.9                            | 14.4                     | 0.26  | 3.25  | -2.12 | -3.03 | 3.20  | 2.75  | -2.50 | -2.19 |
| BS2457                                                                                                               | 6.1                             | 9.4                      | 0.17  | 3.24  | -2.20 | 3.13  | -2.91 | -2.22 | 2.99  | -2.57 |
| BS156                                                                                                                | 7.8                             | 10.4                     | 0.63  | -3.35 | 2.13  | 2.99  | 2.86  | -2.97 | -2.96 | 1.10  |
| BS157                                                                                                                | 5.2                             | 7.2                      | 0.42  | -3.33 | 2.09  | 2.77  | 2.75  | -3.10 | 2.29  | -2.98 |
| BS167                                                                                                                | 7.6                             | 11.0                     | 0.52  | -3.34 | 2.12  | 2.85  | 2.92  | 1.44  | -3.05 | -2.85 |
| BS235                                                                                                                | 22.0                            | 23.9                     | -0.25 | 1.73  | -2.60 | -3.05 | 2.79  | -3.00 | 1.68  | 2.70  |
| BS346                                                                                                                | 6.0                             | 8.2                      | -0.38 | 3.31  | -0.12 | -2.93 | -2.89 | 2.93  | -3.04 | 2.74  |
| BS2346                                                                                                               | 5.5                             | 7.4                      | -0.45 | 3.32  | -2.10 | -2.75 | -2.73 | 3.09  | -2.25 | 2.98  |
| BS345                                                                                                                | 7.2                             | 10.3                     | -0.39 | 3.31  | 0.07  | -3.07 | -3.06 | -2.80 | 2.94  | 2.76  |
| BS347                                                                                                                | 9.7                             | 12.6                     | -0.36 | 3.25  | 0.24  | -3.04 | -3.06 | 2.96  | 2.57  | -2.64 |
| BS137                                                                                                                | 13.1                            | 16.9                     | -0.35 | -3.19 | 1.95  | -3.21 | 2.97  | 2.37  | 2.60  | -2.65 |
| BS145                                                                                                                | 12.1                            | 14.4                     | -0.30 | -3.25 | 2.06  | 3.06  | -3.19 | -2.73 | 2.55  | 2.15  |
| BS125                                                                                                                | 11.0                            | 13.9                     | -0.36 | -3.27 | -2.88 | 2.33  | 2.87  | -3.01 | 2.44  | 2.09  |
| BS127                                                                                                                | 11.2                            | 13.3                     | -0.31 | -3.27 | -2.87 | 2.88  | 2.28  | 2.41  | 2.12  | -2.90 |
| BS135                                                                                                                | 3.7                             | 6.3                      | -0.38 | -3.23 | 2.40  | -3.13 | 2.91  | -2.92 | 1.87  | 2.85  |
| BS136                                                                                                                | 6.6                             | 9.5                      | -0.21 | -3.24 | 2.17  | -3.11 | 2.93  | 2.21  | -3.00 | 2.59  |
| BS146                                                                                                                | 5.4                             | 7.5                      | -0.14 | -3.28 | 2.19  | 2.98  | -3.11 | 2.73  | -2.96 | 2.02  |
| BS147                                                                                                                | 2.1                             | 4.4                      | -0.40 | -3.29 | 2.22  | 2.92  | -3.12 | 2.81  | 2.28  | -2.84 |
|                                                                                                                      |                                 |                          |       |       |       |       |       |       |       |       |
| <b>OBS<sub>6</sub>-BH<sub>26</sub>-TH<sub>2</sub> (M<sub>S</sub> = 2), QM-C region, r<sup>2</sup>SCAN</b>            |                                 |                          |       |       |       |       |       |       |       |       |
| BS235                                                                                                                | 0.9                             | 3.3                      | -0.37 | 3.30  | -2.23 | -3.01 | 3.13  | -2.88 | 2.69  | 2.74  |

Table S36. The relative polarized QM and QM/MM energies (kcal/mol) relative to the lowest-energy model (see Figure 2k in the manuscript) and Mulliken spin populations of Mo and 7 Fe ions for the **OBS<sub>2</sub>-BH<sub>26</sub>-TH<sub>6</sub>** model.

|                                                                                                  |                                 |                          |       |       |       |       |       |       |       |       |
|--------------------------------------------------------------------------------------------------|---------------------------------|--------------------------|-------|-------|-------|-------|-------|-------|-------|-------|
| <b>OBS<sub>2</sub>-BH<sub>26</sub>-TH<sub>6</sub> (M<sub>S</sub> = 2), QM-A region, H-to-Cys</b> |                                 |                          |       |       |       |       |       |       |       |       |
|                                                                                                  | $\Delta E(\text{polarized QM})$ | $\Delta E(\text{QM/MM})$ | Mo    | Fe1   | Fe2   | Fe3   | Fe4   | Fe5   | Fe6   | Fe7   |
| BS567                                                                                            | 41.5                            | 44.4                     | 1.01  | 1.56  | 2.56  | 3.07  | 3.12  | -3.01 | -1.79 | -2.79 |
| BS234                                                                                            | 21.5                            | 23.7                     | -1.07 | 3.33  | -2.05 | -2.59 | -2.59 | 3.15  | 2.19  | 3.07  |
| BS13                                                                                             | 25.3                            | 31.0                     | -1.15 | -3.48 | 2.37  | -3.32 | 2.68  | 2.90  | 2.10  | 2.57  |
| BS356                                                                                            | 20.0                            | 21.7                     | 0.22  | 3.27  | 2.07  | -3.15 | 2.94  | -2.84 | -1.75 | 2.78  |

|                                                                                                                     |                                 |                          |       |       |       |       |       |       |       |       |
|---------------------------------------------------------------------------------------------------------------------|---------------------------------|--------------------------|-------|-------|-------|-------|-------|-------|-------|-------|
| BS256                                                                                                               | 27.3                            | 30.5                     | 0.25  | 2.71  | -3.14 | 2.77  | 3.17  | -2.99 | -1.86 | 2.60  |
| BS267                                                                                                               | 30.4                            | 33.9                     | 0.21  | 3.31  | -3.09 | 2.92  | 2.90  | 2.64  | -2.28 | -2.87 |
| BS367                                                                                                               | 30.1                            | 32.2                     | 0.11  | 3.29  | 2.24  | -3.24 | 2.91  | 2.99  | -1.95 | -2.72 |
| BS456                                                                                                               | 28.3                            | 31.2                     | 0.26  | 3.24  | 3.13  | 1.96  | -3.02 | -2.92 | -1.86 | 2.71  |
| BS457                                                                                                               | 21.4                            | 29.1                     | 0.39  | 3.51  | 3.16  | 3.41  | -3.06 | -2.95 | 1.80  | -2.75 |
| BS156                                                                                                               | 14.0                            | 17.3                     | 0.19  | -3.37 | 2.39  | 3.08  | 2.92  | -2.86 | -1.16 | 2.75  |
| BS167                                                                                                               | 12.7                            | 16.9                     | 0.07  | -3.37 | 2.31  | 2.97  | 3.13  | 3.00  | -1.58 | -2.61 |
| BS247                                                                                                               | 15.9                            | 19.5                     | -0.24 | 3.32  | -2.16 | 3.18  | -2.95 | 2.87  | 2.19  | -2.63 |
| BS237                                                                                                               | 20.4                            | 24.0                     | -0.33 | 3.30  | -2.50 | -3.11 | 3.20  | 3.00  | 2.35  | -2.34 |
| BS245                                                                                                               | 24.7                            | 27.8                     | -0.29 | 3.30  | -2.43 | 3.25  | -3.06 | -2.56 | 2.38  | 2.87  |
| BS345                                                                                                               | 20.0                            | 23.5                     | -0.30 | 3.30  | 2.95  | -2.94 | -2.39 | -2.23 | 2.22  | 2.91  |
| BS125                                                                                                               | 24.8                            | 27.2                     | -0.40 | -3.32 | -2.36 | 3.34  | 3.13  | -2.38 | 2.42  | 3.04  |
| BS127                                                                                                               | 23.0                            | 26.4                     | -0.47 | -3.28 | -2.33 | 3.21  | 3.30  | 3.13  | 2.12  | -2.02 |
| BS147                                                                                                               | 26.9                            | 30.2                     | -0.41 | -1.80 | 3.09  | 3.15  | -2.91 | 2.91  | 2.13  | -2.39 |
|                                                                                                                     |                                 |                          |       |       |       |       |       |       |       |       |
| <b>OBS<sub>2</sub>-BH<sub>26</sub>-TH<sub>6</sub> (M<sub>s</sub> = 1), QM-A region, H-to-Cys, r<sup>2</sup>SCAN</b> |                                 |                          |       |       |       |       |       |       |       |       |
|                                                                                                                     | $\Delta E(\text{polarized QM})$ | $\Delta E(\text{QM/MM})$ | Mo    | Fe1   | Fe2   | Fe3   | Fe4   | Fe5   | Fe6   | Fe7   |
| BS2567                                                                                                              | 25.3                            | 28.6                     | 0.92  | 3.52  | -2.82 | 3.39  | 3.24  | -2.89 | -1.85 | -2.58 |
| BS234                                                                                                               | 16.4                            | 19.2                     | -0.95 | 3.36  | -2.21 | -3.17 | -2.91 | 2.97  | 1.72  | 2.82  |
| BS123                                                                                                               | 35.1                            | 38.4                     | -1.01 | -3.23 | -1.06 | -3.19 | 2.89  | 2.88  | 2.43  | 2.60  |
| BS356                                                                                                               | 25.9                            | 26.6                     | 0.24  | 3.13  | 0.26  | -3.09 | 3.11  | -2.81 | -2.18 | 2.81  |
| BS456                                                                                                               | 38.6                            | 40.4                     | 0.32  | 3.12  | 0.64  | 3.21  | -3.10 | -3.01 | -2.03 | 2.48  |
| BS157                                                                                                               | 13.6                            | 17.9                     | 0.22  | -3.38 | 2.42  | 3.05  | 2.95  | -2.69 | 2.21  | -2.56 |
| BS167                                                                                                               | 16.8                            | 20.1                     | 0.29  | -3.36 | 2.17  | 2.86  | 2.94  | 2.42  | -2.14 | -2.82 |
| BS235                                                                                                               | 11.0                            | 14.9                     | -0.08 | 3.31  | -2.72 | -3.03 | 3.09  | -2.99 | 1.43  | 2.72  |
| BS247                                                                                                               | 11.7                            | 14.9                     | -0.23 | 3.29  | -2.82 | 3.15  | -3.00 | 2.86  | 1.41  | -2.81 |
| BS346                                                                                                               | 15.3                            | 19.3                     | -0.40 | 3.30  | 2.46  | -3.13 | -3.05 | 2.74  | -2.65 | 2.62  |
| BS237                                                                                                               | 15.6                            | 19.5                     | -0.30 | 3.31  | -3.15 | -3.18 | 3.12  | 2.97  | 1.82  | -2.70 |
| BS245                                                                                                               | 20.6                            | 25.1                     | -0.11 | 3.27  | -3.09 | 3.19  | -3.08 | -2.97 | 1.89  | 2.77  |
| BS347                                                                                                               | 9.6                             | 14.2                     | -0.23 | 3.34  | 3.04  | -3.20 | -3.17 | 2.93  | 1.86  | -2.55 |
| BS137                                                                                                               | 19.7                            | 24.5                     | -0.29 | -3.28 | 2.88  | -3.11 | 3.21  | 3.01  | 2.22  | -2.53 |
| BS125                                                                                                               | 14.2                            | 18.6                     | -0.29 | -3.33 | -2.93 | 3.29  | 3.10  | -2.79 | 1.94  | 2.92  |
| BS127                                                                                                               | 13.1                            | 16.9                     | -0.33 | -3.32 | -2.95 | 3.14  | 3.25  | 3.02  | 1.85  | -2.65 |
| BS135                                                                                                               | 11.6                            | 16.0                     | -0.37 | -3.31 | 3.11  | -3.08 | 3.16  | -2.49 | 2.07  | 2.82  |
| BS147                                                                                                               | 9.6                             | 13.6                     | -0.42 | -3.32 | 3.13  | 3.20  | -3.11 | 2.92  | 2.12  | -2.40 |
| BS147<br>(H-to-Phe)                                                                                                 | 14.5                            | 17.2                     | -0.40 | -3.32 | 3.20  | 3.19  | -3.14 | 2.91  | 2.10  | -2.39 |
| BS147<br>(H-to-hyd)                                                                                                 | 10.5                            | 14.0                     | -0.41 | -3.32 | 3.11  | 3.19  | -3.09 | 2.92  | 2.11  | -2.39 |
|                                                                                                                     |                                 |                          |       |       |       |       |       |       |       |       |
| <b>OBS<sub>2</sub>-BH<sub>26</sub>-TH<sub>6</sub> (M<sub>s</sub> = 0), QM-A region, H-to-Cys, r<sup>2</sup>SCAN</b> |                                 |                          |       |       |       |       |       |       |       |       |
|                                                                                                                     | $\Delta E(\text{polarized QM})$ | $\Delta E(\text{QM/MM})$ | Mo    | Fe1   | Fe2   | Fe3   | Fe4   | Fe5   | Fe6   | Fe7   |
| BS1567                                                                                                              | 17.5                            | 22.2                     | 0.86  | -3.36 | 2.41  | 3.25  | 3.22  | -2.50 | -1.47 | -2.37 |
| BS123                                                                                                               | 26.5                            | 31.9                     | -1.13 | -3.48 | -3.09 | -3.35 | 3.10  | 3.26  | 2.12  | 2.96  |
| BS124                                                                                                               | 26.8                            | 28.6                     | -1.01 | -3.34 | -2.32 | 3.06  | -3.16 | 2.87  | 1.48  | 2.72  |
| BS2356                                                                                                              | 12.8                            | 15.4                     | 0.26  | 3.33  | -2.54 | -3.06 | 3.13  | -2.81 | -1.67 | 2.83  |
| BS2467                                                                                                              | 13.0                            | 16.3                     | 0.29  | 3.29  | -2.83 | 3.14  | -3.02 | 2.95  | -1.41 | -2.72 |

|                                                                                                           |      |      |       |       |       |       |       |       |       |       |
|-----------------------------------------------------------------------------------------------------------|------|------|-------|-------|-------|-------|-------|-------|-------|-------|
| BS357                                                                                                     | 29.5 | 30.1 | 0.62  | 2.93  | 1.37  | -3.14 | 3.09  | -3.03 | 1.13  | -2.83 |
| BS157                                                                                                     | 15.4 | 17.9 | 0.59  | -3.36 | 2.48  | 2.93  | 2.82  | -3.02 | 0.97  | -2.84 |
| BS167                                                                                                     | 31.0 | 34.2 | 0.30  | -3.31 | 1.87  | 2.87  | 1.41  | 2.21  | -2.10 | -2.89 |
| BS247                                                                                                     | 13.0 | 16.3 | 0.29  | 3.29  | -2.84 | 3.14  | -3.02 | 2.95  | -1.41 | -2.72 |
| BS126                                                                                                     | 29.3 | 34.4 | -0.14 | -3.33 | -3.12 | 3.11  | 2.59  | 1.79  | -2.41 | 1.67  |
| BS135                                                                                                     | 13.0 | 16.3 | -0.32 | -3.29 | 2.87  | -3.14 | 3.03  | -2.94 | 1.36  | 2.72  |
| BS136                                                                                                     | 24.6 | 28.1 | -0.25 | -3.30 | 2.33  | -3.18 | 2.85  | 1.93  | -2.60 | 2.48  |
| BS146                                                                                                     | 20.4 | 24.9 | -0.24 | -3.30 | 2.30  | 2.80  | -3.19 | 2.72  | -2.38 | 1.52  |
|                                                                                                           |      |      |       |       |       |       |       |       |       |       |
| <b>OBS<sub>2</sub>-BH<sub>26</sub>-TH<sub>6</sub> (M<sub>S</sub> = 1), QM-C region, r<sup>2</sup>SCAN</b> |      |      |       |       |       |       |       |       |       |       |
| BS147                                                                                                     | 14.9 | 14.5 | -0.36 | -3.31 | 3.12  | 3.19  | -3.09 | 2.91  | 2.13  | -2.44 |

Table S37. The relative polarized QM and QM/MM energies (kcal/mol) relative to the lowest-energy model (see Figure 2k in the manuscript) and Mulliken spin populations of Mo and 7 Fe ions for the **OBS<sub>6</sub>-DH<sub>2</sub>** model.

| <b>OBS<sub>6</sub>-DH<sub>2</sub> (M<sub>S</sub> = 2), QM-A region, H-to-homo, r<sup>2</sup>SCAN</b> |                                 |                          |       |       |       |       |       |       |       |       |
|------------------------------------------------------------------------------------------------------|---------------------------------|--------------------------|-------|-------|-------|-------|-------|-------|-------|-------|
|                                                                                                      | $\Delta E(\text{polarized QM})$ | $\Delta(\text{QM/MM})$   | Mo    | Fe1   | Fe2   | Fe3   | Fe4   | Fe5   | Fe6   | Fe7   |
| BS234                                                                                                | 2.3                             | 4.2                      | -1.09 | 3.34  | -2.11 | -2.87 | -2.85 | 3.06  | 2.86  | 2.94  |
| BS123                                                                                                | 23.2                            | 23.6                     | -1.17 | -3.00 | -2.39 | -2.28 | 3.22  | 3.08  | 3.06  | 3.02  |
| BS14                                                                                                 | 19.4                            | 18.4                     | -1.14 | -3.24 | 0.93  | 2.70  | -3.23 | 2.76  | 2.90  | 2.59  |
| BS134                                                                                                | 22.0                            | 21.0                     | -1.28 | -3.13 | 2.83  | -1.29 | -2.87 | 3.11  | 3.24  | 3.06  |
| BS257                                                                                                | 17.2                            | 16.6                     | 0.43  | 2.89  | -2.54 | 2.42  | 3.14  | -2.93 | 2.96  | -2.79 |
| BS256                                                                                                | 18.9                            | 17.7                     | 0.42  | 2.96  | -2.54 | 2.69  | 3.19  | -3.01 | -2.99 | 2.72  |
| BS267                                                                                                | 15.8                            | 14.9                     | 0.41  | 3.26  | -2.87 | 2.99  | 3.14  | 2.79  | -2.93 | -2.96 |
| BS157                                                                                                | 3.2                             | 5.3                      | 0.13  | -3.40 | 2.81  | 3.24  | 3.12  | -2.59 | 3.03  | -2.36 |
| BS167                                                                                                | 5.4                             | 7.8                      | 0.12  | -3.37 | 2.76  | 3.15  | 3.19  | 3.09  | -2.32 | -2.61 |
| BS235                                                                                                | 1.2                             | 1.8                      | -0.33 | 3.32  | -2.45 | -3.10 | 3.14  | -2.88 | 2.95  | 2.74  |
| BS247                                                                                                | 0.0                             | 2.3                      | -0.26 | 3.29  | -2.44 | 3.15  | -3.04 | 2.88  | 2.89  | -2.82 |
| BS236                                                                                                | 1.1                             | 2.0                      | -0.31 | 3.31  | -2.69 | -3.17 | 3.14  | 3.05  | -2.87 | 2.90  |
| BS237                                                                                                | 4.2                             | 4.9                      | -0.38 | 3.31  | -2.69 | -3.22 | 3.11  | 2.98  | 3.07  | -2.62 |
| BS245                                                                                                | 7.3                             | 7.7                      | -0.35 | 3.29  | -2.65 | 3.09  | -3.15 | -2.71 | 3.09  | 2.85  |
| BS246                                                                                                | 3.3                             | 4.0                      | -0.31 | 3.29  | -2.67 | 3.13  | -3.11 | 3.01  | -2.86 | 2.95  |
| BS345                                                                                                | 7.1                             | 7.5                      | -0.38 | 3.30  | 2.98  | -3.08 | -2.68 | -2.70 | 3.00  | 2.94  |
| BS347                                                                                                | 8.1                             | 8.4                      | -0.40 | 3.29  | 2.95  | -2.64 | -3.08 | 3.06  | 2.97  | -2.58 |
| BS126                                                                                                | 4.4                             | 5.7                      | -0.31 | -3.30 | -2.69 | 3.26  | 3.24  | 3.06  | -2.71 | 2.95  |
| BS137                                                                                                | 8.9                             | 9.4                      | -0.54 | -3.28 | 2.83  | -2.62 | 3.22  | 3.11  | 3.13  | -2.15 |
| BS145                                                                                                | 7.9                             | 8.0                      | -0.48 | -3.31 | 2.91  | 3.30  | -2.71 | -2.31 | 3.16  | 3.01  |
| BS125                                                                                                | 8.4                             | 8.4                      | -0.37 | -3.28 | -2.39 | 3.31  | 3.14  | -2.82 | 3.04  | 2.96  |
| BS127                                                                                                | 7.9                             | 7.7                      | -0.35 | -3.28 | -2.33 | 3.13  | 3.28  | 3.08  | 2.98  | -2.75 |
| BS135                                                                                                | 13.1                            | 13.2                     | -0.61 | -3.28 | 2.81  | -2.96 | 3.24  | -1.87 | 3.22  | 2.97  |
| BS147                                                                                                | 10.7                            | 11.0                     | -0.65 | -3.32 | 2.84  | 3.29  | -3.01 | 3.03  | 3.18  | -1.64 |
|                                                                                                      |                                 |                          |       |       |       |       |       |       |       |       |
| <b>OBS<sub>6</sub>-DH<sub>2</sub> (M<sub>S</sub> = 1), QM-A region, H-to-homo, r<sup>2</sup>SCAN</b> |                                 |                          |       |       |       |       |       |       |       |       |
|                                                                                                      | $\Delta E(\text{polarized QM})$ | $\Delta E(\text{QM/MM})$ | Mo    | Fe1   | Fe2   | Fe3   | Fe4   | Fe5   | Fe6   | Fe7   |
| BS234                                                                                                | 2.2                             | 5.3                      | -0.99 | 3.36  | -2.44 | -3.21 | -3.04 | 2.78  | 2.84  | 2.32  |
| BS123                                                                                                | 9.8                             | 13.4                     | -1.17 | -3.35 | -2.86 | -3.17 | 3.20  | 3.06  | 3.14  | 3.00  |
| BS124                                                                                                | 12.4                            | 12.2                     | -1.13 | -3.33 | -2.83 | 3.19  | -3.16 | 3.10  | 3.17  | 2.90  |

|                                                                                           |                                 |                          |       |       |       |       |       |       |       |       |
|-------------------------------------------------------------------------------------------|---------------------------------|--------------------------|-------|-------|-------|-------|-------|-------|-------|-------|
| BS134                                                                                     | 19.3                            | 18.2                     | -1.21 | -3.31 | 2.91  | -3.03 | -3.01 | 3.23  | 3.16  | 2.97  |
| BS356                                                                                     | 12.4                            | 13.4                     | 0.29  | 3.20  | 1.08  | -3.14 | 3.17  | -2.91 | -2.78 | 2.76  |
| BS467                                                                                     | 12.5                            | 14.9                     | 0.34  | 3.16  | 1.08  | 3.19  | -3.10 | 2.84  | -2.82 | -2.78 |
| BS256                                                                                     | 29.1                            | 27.8                     | 0.41  | 0.83  | -2.61 | 3.04  | 3.15  | -3.00 | -2.95 | 2.76  |
| BS267                                                                                     | 20.8                            | 20.6                     | 0.42  | 3.20  | -2.81 | 3.00  | 1.27  | 2.73  | -2.99 | -2.94 |
| BS357                                                                                     | 16.2                            | 15.8                     | 0.28  | 2.71  | 2.62  | -3.14 | 2.90  | -3.04 | 2.76  | -2.94 |
| BS367                                                                                     | 18.8                            | 18.7                     | 0.37  | 3.04  | 2.40  | -3.21 | 2.99  | 2.56  | -3.11 | -2.90 |
| BS456                                                                                     | 18.8                            | 19.8                     | 0.37  | 3.13  | 2.63  | 2.61  | -3.18 | -3.01 | -3.07 | 2.51  |
| BS156                                                                                     | 2.6                             | 3.7                      | 0.39  | -3.36 | 2.33  | 3.11  | 2.98  | -2.93 | -2.86 | 2.59  |
| BS167                                                                                     | 2.9                             | 3.8                      | 0.38  | -3.36 | 2.30  | 3.01  | 3.06  | 2.71  | -2.88 | -2.82 |
| BS235                                                                                     | 6.7                             | 7.7                      | -0.36 | 3.28  | -2.96 | -3.17 | 3.02  | -3.06 | 2.37  | 2.63  |
| BS346                                                                                     | 0.8                             | 1.6                      | -0.39 | 3.30  | 2.43  | -3.09 | -3.08 | 2.89  | -3.00 | 2.77  |
| BS236                                                                                     | 8.5                             | 8.6                      | -0.17 | 3.29  | -2.85 | -3.27 | 2.98  | 2.31  | -3.00 | 2.58  |
| BS237                                                                                     | 22.7                            | 23.1                     | -0.38 | 1.89  | -2.66 | -3.16 | 2.84  | 2.97  | 3.06  | -2.62 |
| BS246                                                                                     | 9.9                             | 11.6                     | -0.09 | 3.26  | -2.77 | 2.93  | -3.16 | 2.74  | -2.96 | 1.91  |
| BS345                                                                                     | 4.0                             | 4.6                      | -0.43 | 3.30  | 2.57  | -3.19 | -3.25 | -2.89 | 2.92  | 2.85  |
| BS126                                                                                     | 10.5                            | 12.0                     | -0.40 | -3.32 | -2.82 | 3.12  | 2.78  | 2.63  | -2.77 | 2.79  |
| BS137                                                                                     | 6.8                             | 7.4                      | -0.47 | -3.29 | 2.69  | -3.22 | 3.12  | 3.01  | 2.96  | -2.67 |
| BS145                                                                                     | 5.3                             | 5.6                      | -0.47 | -3.32 | 2.73  | 3.18  | -3.19 | -2.77 | 2.97  | 2.89  |
| BS125                                                                                     | 8.6                             | 10.5                     | -0.34 | -3.34 | -2.80 | 3.08  | 3.00  | -2.88 | 2.84  | 2.51  |
| BS127                                                                                     | 9.2                             | 9.2                      | -0.33 | -3.34 | -2.78 | 3.00  | 3.03  | 2.70  | 2.81  | -2.83 |
| BS135                                                                                     | 1.2                             | 1.2                      | -0.47 | -3.29 | 2.74  | -3.12 | 3.06  | -2.81 | 3.03  | 2.85  |
| BS136                                                                                     | 6.7                             | 8.0                      | -0.53 | -3.30 | 2.68  | -3.19 | 3.20  | 3.06  | -2.68 | 2.82  |
| BS146                                                                                     | 6.1                             | 6.5                      | -0.46 | -3.33 | 2.69  | 3.28  | -3.20 | 2.92  | -2.70 | 2.95  |
| BS147                                                                                     | 0.0                             | 0.0                      | -0.43 | -3.32 | 2.74  | 3.10  | -3.12 | 2.95  | 3.01  | -2.73 |
| BS147<br>(H-to-Phe)                                                                       | -1.0                            | 0.4                      | -0.42 | -3.31 | 2.73  | 3.09  | -3.13 | 2.96  | 3.00  | -2.72 |
| BS147<br>(H-to-Val)                                                                       | 0.4                             | 1.7                      | -0.40 | -3.31 | 2.73  | 3.09  | -3.13 | 2.96  | 2.99  | -2.73 |
|                                                                                           |                                 |                          |       |       |       |       |       |       |       |       |
| <b>OBS<sub>6</sub>-DH<sub>2</sub> (Ms = 0), QM-A region, H-to-homo, r<sup>2</sup>SCAN</b> |                                 |                          |       |       |       |       |       |       |       |       |
|                                                                                           | $\Delta E(\text{polarized QM})$ | $\Delta E(\text{QM/MM})$ | Mo    | Fe1   | Fe2   | Fe3   | Fe4   | Fe5   | Fe6   | Fe7   |
| BS2567                                                                                    | 15.6                            | 15.8                     | 1.01  | 3.33  | -2.82 | 3.20  | 3.19  | -2.82 | -2.90 | -2.49 |
| BS134                                                                                     | 15.6                            | 15.7                     | -1.03 | -3.34 | 2.82  | -3.20 | -3.20 | 2.84  | 2.90  | 2.52  |
| BS257                                                                                     | 6.0                             | 8.1                      | 0.33  | -3.31 | -0.05 | 3.00  | 2.91  | -2.89 | 3.05  | -2.72 |
| BS2467                                                                                    | 6.6                             | 8.6                      | 0.42  | 3.27  | -1.62 | 3.22  | -2.89 | 2.89  | -2.89 | -2.76 |
| BS267                                                                                     | 33.9                            | 32.0                     | 0.36  | 0.60  | -2.95 | 2.85  | 2.56  | 2.73  | -2.97 | -2.98 |
| BS2357                                                                                    | 8.2                             | 8.9                      | 0.14  | 3.29  | -2.11 | -3.02 | 3.14  | -2.72 | 3.05  | -2.18 |
| BS2367                                                                                    | 13.4                            | 14.6                     | 0.28  | 3.31  | -2.55 | -3.09 | 3.22  | 3.00  | -2.66 | -1.94 |
| BS2456                                                                                    | 15.6                            | 17.4                     | 0.41  | 3.24  | -1.18 | 3.27  | -3.01 | -2.94 | -2.90 | 2.72  |
| BS457                                                                                     | 28.6                            | 28.1                     | 0.29  | 0.44  | 2.59  | 3.05  | -3.11 | -3.04 | 2.87  | -2.93 |
| BS156                                                                                     | 11.7                            | 12.5                     | 0.55  | -3.37 | 2.19  | 3.02  | 2.89  | -2.92 | -3.12 | 1.09  |
| BS157                                                                                     | 8.1                             | 8.3                      | 0.41  | -3.34 | 1.93  | 2.76  | 2.75  | -3.10 | 2.40  | -2.99 |
| BS167                                                                                     | 12.7                            | 15.3                     | 0.26  | -3.34 | 2.27  | 2.78  | 2.08  | 2.32  | -2.93 | -2.89 |
| BS2345                                                                                    | 12.8                            | 15.3                     | -0.30 | 3.33  | -2.21 | -2.76 | -2.14 | -2.32 | 2.95  | 2.88  |
| BS247                                                                                     | 26.8                            | 25.4                     | -0.18 | 2.66  | -2.60 | 1.29  | -3.16 | 2.85  | 2.56  | -2.91 |
| BS236                                                                                     | 23.8                            | 23.2                     | -0.19 | 1.87  | -2.89 | -3.26 | 2.68  | 2.37  | -3.00 | 2.67  |

|                                                                                |      |      |       |       |       |       |       |       |       |       |
|--------------------------------------------------------------------------------|------|------|-------|-------|-------|-------|-------|-------|-------|-------|
| BS246                                                                          | 25.3 | 24.8 | -0.12 | 2.29  | -2.86 | 2.28  | -3.29 | 2.82  | -3.01 | 2.24  |
| BS345                                                                          | 9.3  | 11.3 | -0.39 | 3.30  | 0.12  | -3.11 | -3.10 | -2.82 | 3.00  | 2.77  |
| BS126                                                                          | 19.1 | 20.9 | -0.40 | -3.32 | -3.02 | 2.70  | 2.57  | 2.83  | -3.12 | 2.28  |
| BS137                                                                          | 16.1 | 17.3 | -0.45 | -3.23 | 1.18  | -3.27 | 3.00  | 2.97  | 2.94  | -2.72 |
| BS145                                                                          | 13.4 | 14.6 | -0.31 | -3.31 | 2.54  | 3.10  | -3.22 | -2.99 | 2.74  | 1.87  |
| BS135                                                                          | 7.4  | 8.5  | -0.45 | -3.27 | 1.61  | -3.21 | 2.88  | -2.90 | 2.92  | 2.78  |
| BS136                                                                          | 9.2  | 10.5 | -0.26 | -3.26 | 2.12  | -3.14 | 2.97  | 2.33  | -3.05 | 2.60  |
| BS146                                                                          | 8.2  | 9.0  | -0.18 | -3.29 | 2.09  | 3.03  | -3.13 | 2.74  | -3.03 | 2.15  |
|                                                                                |      |      |       |       |       |       |       |       |       |       |
| <b>OBS<sub>6</sub>-DH<sub>2</sub> (Ms = 1), QM-C region, r<sup>2</sup>SCAN</b> |      |      |       |       |       |       |       |       |       |       |
| BS147                                                                          | 0.0  | 0.0  | -0.40 | -3.31 | 2.70  | 3.07  | -3.10 | 2.95  | 3.02  | -2.73 |

Table S38. The relative polarized QM and QM/MM energies (kcal/mol) relative to the lowest-energy model (see Figure 2k in the manuscript) and Mulliken spin populations of Mo and 7 Fe ions for the **OBS<sub>2</sub>-DH<sub>6</sub>** model.

| <b>OBS<sub>2</sub>-DH<sub>6</sub> (Ms = 2), QM-A region, H-to-Cys, r<sup>2</sup>SCAN</b> |                                 |                          |       |       |       |       |       |       |       |       |
|------------------------------------------------------------------------------------------|---------------------------------|--------------------------|-------|-------|-------|-------|-------|-------|-------|-------|
|                                                                                          | $\Delta E(\text{polarized QM})$ | $\Delta E(\text{QM/MM})$ | Mo    | Fe1   | Fe2   | Fe3   | Fe4   | Fe5   | Fe6   | Fe7   |
| BS567                                                                                    | 35.0                            | 39.7                     | 1.04  | 1.56  | 2.83  | 3.10  | 3.14  | -3.00 | -2.19 | -2.81 |
| BS257                                                                                    | 11.4                            | 17.9                     | 0.37  | 3.49  | -3.17 | 3.27  | 3.15  | -2.91 | 2.06  | -2.70 |
| BS357                                                                                    | 16.3                            | 21.7                     | 0.37  | 3.46  | 3.19  | -3.12 | 3.34  | -2.91 | 2.02  | -2.90 |
| BS456                                                                                    | 24.4                            | 28.4                     | 0.37  | 3.20  | 3.17  | 2.41  | -3.09 | -2.99 | -2.24 | 2.70  |
| BS457                                                                                    | 14.9                            | 22.7                     | 0.34  | 3.49  | 3.20  | 3.36  | -3.11 | -2.98 | 1.99  | -2.78 |
| BS157                                                                                    | 8.9                             | 17.7                     | 0.13  | -3.37 | 3.34  | 3.25  | 3.17  | -2.55 | 2.30  | -2.39 |
| BS346                                                                                    | -0.7                            | 5.7                      | -0.41 | 3.34  | 3.08  | -3.08 | -3.08 | 2.88  | -2.06 | 2.75  |
| BS346 (H-to-Val)                                                                         | 1.3                             | 7.6                      | -0.36 | 3.36  | 3.12  | -3.08 | -3.05 | 2.86  | -2.12 | 2.72  |
| BS346 (H-to-Phe)                                                                         | 3.8                             | 9.1                      | -0.37 | 3.35  | 3.11  | -3.06 | -3.08 | 2.87  | -2.12 | 2.73  |
| BS236                                                                                    | 7.2                             | 13.1                     | -0.34 | 3.29  | -3.13 | -3.28 | 3.14  | 3.03  | -2.02 | 2.83  |
| BS246                                                                                    | 10.4                            | 17.3                     | -0.38 | 3.26  | -3.18 | 3.13  | -3.21 | 2.94  | -1.94 | 2.92  |
| BS136                                                                                    | 10.9                            | 16.8                     | -0.59 | -3.28 | 3.16  | -3.13 | 3.26  | 3.10  | -1.73 | 2.87  |
| BS146                                                                                    | 9.1                             | 14.9                     | -0.53 | -3.29 | 3.14  | 3.32  | -3.15 | 2.97  | -1.70 | 3.00  |
|                                                                                          |                                 |                          |       |       |       |       |       |       |       |       |
| <b>OBS<sub>2</sub>-DH<sub>6</sub> (Ms = 1), QM-A region, H-to-Cys, r<sup>2</sup>SCAN</b> |                                 |                          |       |       |       |       |       |       |       |       |
|                                                                                          | $\Delta E(\text{polarized QM})$ | $\Delta E(\text{QM/MM})$ | Mo    | Fe1   | Fe2   | Fe3   | Fe4   | Fe5   | Fe6   | Fe7   |
| BS257                                                                                    | 17.7                            | 22.8                     | 0.67  | 3.25  | -3.14 | 2.93  | 3.02  | -3.09 | 1.54  | -2.93 |
| BS357                                                                                    | 18.2                            | 21.9                     | 0.40  | 3.35  | 2.31  | -3.21 | 3.13  | -3.03 | 1.86  | -2.90 |
| BS457                                                                                    | 19.8                            | 24.1                     | 0.36  | 3.33  | 2.23  | 3.20  | -3.19 | -3.02 | 1.92  | -2.88 |
| BS156                                                                                    | 13.9                            | 18.3                     | 0.27  | -3.37 | 2.33  | 2.99  | 2.86  | -2.93 | -2.40 | 2.46  |
| BS157                                                                                    | 8.0                             | 15.9                     | 0.44  | -3.35 | 3.03  | 3.01  | 2.98  | -2.90 | 2.03  | -2.81 |
| BS235                                                                                    | 8.4                             | 13.4                     | -0.18 | 3.28  | -2.88 | -3.04 | 3.17  | -3.03 | 1.69  | 2.71  |
| BS347                                                                                    | 5.1                             | 10.8                     | -0.39 | 3.31  | 2.93  | -3.26 | -3.22 | 2.96  | 2.40  | -2.72 |
| BS126                                                                                    | 16.2                            | 22.8                     | -0.23 | -3.33 | -3.17 | 3.10  | 3.09  | 2.20  | -1.64 | 2.02  |
| BS125                                                                                    | 8.2                             | 13.8                     | -0.40 | -3.33 | -3.03 | 3.28  | 3.14  | -2.89 | 2.31  | 2.99  |
| BS127                                                                                    | 6.5                             | 12.0                     | -0.34 | -3.33 | -3.03 | 3.14  | 3.25  | 3.09  | 2.27  | -2.83 |
| BS136                                                                                    | 16.2                            | 21.5                     | -0.43 | -3.25 | 2.79  | -3.20 | 2.67  | 2.77  | -1.84 | 2.60  |
| BS146                                                                                    | 14.4                            | 19.5                     | -0.29 | -3.28 | 2.91  | 2.91  | -3.21 | 2.67  | -1.80 | 2.28  |
|                                                                                          |                                 |                          |       |       |       |       |       |       |       |       |



| <b>OBS<sub>2</sub>-DH<sub>6</sub> (Ms = 0), QM-A region, H-to-Cys, r<sup>2</sup>SCAN</b> |                                 |                          |       |       |       |       |       |       |       |       |
|------------------------------------------------------------------------------------------|---------------------------------|--------------------------|-------|-------|-------|-------|-------|-------|-------|-------|
|                                                                                          | $\Delta E(\text{polarized QM})$ | $\Delta E(\text{QM/MM})$ | Mo    | Fe1   | Fe2   | Fe3   | Fe4   | Fe5   | Fe6   | Fe7   |
| BS2346                                                                                   | 12.4                            | 16.1                     | -0.42 | 3.37  | -2.11 | -2.92 | -2.85 | 3.01  | -1.60 | 2.89  |
| BS257                                                                                    | 28.4                            | 32.5                     | 0.89  | 2.91  | -3.10 | 2.16  | 3.11  | -3.02 | 0.04  | -2.89 |
| BS2356                                                                                   | 12.6                            | 16.1                     | 0.33  | 3.30  | -2.79 | -3.07 | 3.16  | -2.80 | -1.45 | 2.85  |
| BS357                                                                                    | 27.4                            | 28.9                     | 0.39  | 3.01  | 1.30  | -3.17 | 3.05  | -3.01 | 1.55  | -2.92 |
| BS237                                                                                    | 17.1                            | 22.1                     | 0.18  | 3.29  | -3.18 | -3.22 | 3.10  | 2.81  | -0.20 | -2.82 |
| BS456                                                                                    | 10.5                            | 14.4                     | -0.01 | 3.33  | 3.02  | -3.18 | -3.20 | -2.88 | 0.19  | 2.64  |
| BS457                                                                                    | 25.7                            | 30.2                     | 0.41  | 3.04  | 1.14  | 3.05  | -3.13 | -3.05 | 1.66  | -2.90 |
| BS157                                                                                    | 12.3                            | 16.0                     | 0.41  | -3.37 | 2.10  | 2.96  | 2.89  | -3.02 | 1.56  | -2.90 |
| BS235                                                                                    | 25.2                            | 29.8                     | -0.21 | 1.78  | -2.93 | -3.02 | 2.94  | -3.03 | 1.82  | 2.75  |
| BS2467                                                                                   | 11.0                            | 16.4                     | 0.23  | 3.28  | -3.18 | 3.13  | -3.05 | 2.93  | -0.81 | -2.71 |
| BS245                                                                                    | 19.3                            | 25.3                     | 0.11  | 3.27  | -3.18 | 3.16  | -3.14 | -2.81 | 0.22  | 2.27  |
| BS345                                                                                    | 10.5                            | 14.4                     | -0.01 | 3.33  | 3.02  | -3.18 | -3.20 | -2.88 | 0.20  | 2.64  |
| BS347                                                                                    | 8.2                             | 14.4                     | 0.01  | 3.33  | 3.02  | -3.21 | -3.16 | 2.79  | -0.06 | -2.68 |
| BS137                                                                                    | 19.2                            | 25.2                     | -0.14 | -3.27 | 3.16  | -3.15 | 3.15  | 2.84  | -0.24 | -2.28 |
| BS145                                                                                    | 16.9                            | 22.1                     | -0.19 | -3.29 | 3.17  | 3.24  | -3.09 | -2.79 | 0.13  | 2.85  |
| BS125                                                                                    | 8.5                             | 14.3                     | -0.02 | -3.33 | -3.00 | 3.23  | 3.17  | -2.77 | -0.09 | 2.75  |
| BS127                                                                                    | 10.1                            | 14.2                     | -0.03 | -3.33 | -3.00 | 3.18  | 3.21  | 2.92  | -0.23 | -2.64 |
| BS135                                                                                    | 11.0                            | 16.4                     | -0.26 | -3.28 | 3.18  | -3.12 | 3.06  | -2.93 | 0.79  | 2.72  |
| BS147                                                                                    | 8.5                             | 13.7                     | -0.29 | -3.30 | 3.11  | 3.07  | -3.16 | 2.82  | 0.98  | -2.84 |
|                                                                                          |                                 |                          |       |       |       |       |       |       |       |       |
| <b>OBS<sub>2</sub>-DH<sub>6</sub> (Ms = 2), QM-C region, r<sup>2</sup>SCAN</b>           |                                 |                          |       |       |       |       |       |       |       |       |
| BS346                                                                                    | 6.6                             | 7.1                      | -0.44 | 3.32  | 3.08  | -3.06 | -3.06 | 2.87  | -2.06 | 2.77  |

Table S39. The relative polarized QM and QM/MM energies (kcal/mol) relative to the lowest-energy model (see Figure 2k in the manuscript) and Mulliken spin populations of Mo and 7 Fe ions for the **CBS<sub>37</sub>-OBS<sub>2</sub>-BH<sub>26</sub>** model.

| <b>CBS<sub>37</sub>-OBS<sub>2</sub>-BH<sub>26</sub> (Ms = 2), QM-A region, H<sub>S2B</sub>-to-Cys-H<sub>S5A</sub>-to-Arg359, r<sup>2</sup>SCAN</b> |                                 |                          |       |       |       |       |       |       |       |       |
|----------------------------------------------------------------------------------------------------------------------------------------------------|---------------------------------|--------------------------|-------|-------|-------|-------|-------|-------|-------|-------|
|                                                                                                                                                    | $\Delta E(\text{polarized QM})$ | $\Delta E(\text{QM/MM})$ | Mo    | Fe1   | Fe2   | Fe3   | Fe4   | Fe5   | Fe6   | Fe7   |
| BS567                                                                                                                                              | 47.1                            | 45.7                     | 1.25  | 2.77  | 2.78  | 2.62  | 3.10  | -3.13 | -2.73 | -3.01 |
| BS234                                                                                                                                              | 31.0                            | 30.5                     | -1.14 | 3.35  | -2.20 | -2.65 | -2.85 | 3.11  | 2.77  | 2.98  |
| BS356                                                                                                                                              | 36.4                            | 35.3                     | 0.31  | 3.23  | 2.77  | -3.05 | 3.02  | -2.93 | -2.48 | 2.74  |
| BS467                                                                                                                                              | 33.0                            | 32.4                     | 0.25  | 3.34  | 2.80  | 2.94  | -3.14 | 2.90  | -2.63 | -2.80 |
| BS256                                                                                                                                              | 35.6                            | 36.9                     | 0.20  | 3.31  | -3.19 | 3.15  | 3.16  | -2.97 | -2.70 | 2.64  |
| BS267                                                                                                                                              | 33.3                            | 34.1                     | 0.07  | 3.31  | -3.21 | 3.03  | 3.16  | 2.81  | -2.68 | -2.91 |
| BS357                                                                                                                                              | 30.5                            | 30.5                     | 0.48  | 3.28  | 2.88  | -2.93 | 3.25  | -2.97 | 2.42  | -2.87 |
| BS367                                                                                                                                              | 35.4                            | 33.9                     | 0.39  | 3.27  | 2.78  | -3.01 | 3.01  | 2.81  | -2.80 | -2.84 |
| BS456                                                                                                                                              | 33.7                            | 34.2                     | 0.27  | 3.36  | 3.08  | 2.99  | -3.10 | -3.00 | -2.75 | 2.77  |
| BS457                                                                                                                                              | 33.4                            | 33.6                     | 0.38  | 3.36  | 2.94  | 3.18  | -3.03 | -3.01 | 2.50  | -2.71 |
| BS156                                                                                                                                              | 33.8                            | 32.8                     | 0.34  | -3.15 | 2.62  | 3.13  | 3.05  | -2.84 | -2.50 | 2.98  |
| BS157                                                                                                                                              | 30.4                            | 33.4                     | 0.40  | -3.18 | 2.83  | 3.10  | 3.10  | -2.86 | 2.91  | -2.58 |
| BS167                                                                                                                                              | 30.7                            | 29.7                     | 0.17  | -3.23 | 2.68  | 3.01  | 3.20  | 3.01  | -2.38 | -2.71 |
| BS235                                                                                                                                              | 22.7                            | 26.7                     | -0.31 | 3.29  | -2.86 | -2.94 | 3.15  | -2.50 | 2.82  | 2.76  |
| BS247                                                                                                                                              | 23.3                            | 25.9                     | -0.38 | 3.33  | -2.91 | 3.04  | -3.03 | 2.93  | 2.69  | -2.16 |
| BS236                                                                                                                                              | 28.7                            | 30.8                     | -0.44 | 3.28  | -2.68 | -3.10 | 3.05  | 3.00  | -2.39 | 2.79  |
| BS237                                                                                                                                              | 23.7                            | 26.8                     | -0.21 | 3.32  | -3.08 | -3.04 | 3.18  | 3.05  | 2.69  | -2.49 |

|       |      |      |       |       |       |       |       |       |       |       |
|-------|------|------|-------|-------|-------|-------|-------|-------|-------|-------|
| BS245 | 31.2 | 31.5 | -0.41 | 3.31  | -2.77 | 3.05  | -2.70 | -2.66 | 2.82  | 2.88  |
| BS246 | 28.5 | 30.4 | -0.48 | 3.36  | -2.68 | 2.98  | -3.15 | 2.93  | -2.34 | 2.91  |
| BS345 | 29.5 | 31.4 | -0.23 | 3.30  | 3.06  | -3.00 | -2.86 | -2.33 | 2.75  | 2.91  |
| BS347 | 24.2 | 27.2 | -0.21 | 3.34  | 2.97  | -2.56 | -3.07 | 2.99  | 2.66  | -2.52 |
| BS126 | 32.6 | 32.4 | -0.67 | -3.30 | -2.84 | 3.01  | 3.20  | 3.07  | -1.73 | 2.89  |
| BS145 | 35.3 | 35.6 | -0.32 | -3.29 | 3.19  | 3.24  | -2.71 | -2.35 | 2.82  | 3.02  |
| BS125 | 28.7 | 32.4 | -0.47 | -3.29 | -2.70 | 3.24  | 3.13  | -2.21 | 2.85  | 2.97  |
| BS136 | 33.1 | 35.7 | -0.71 | -3.35 | 3.07  | -2.88 | 3.26  | 3.16  | -1.66 | 2.83  |
| BS146 | 32.3 | 33.6 | -0.88 | -3.33 | 3.07  | 3.22  | -3.10 | 3.08  | -1.28 | 3.04  |

**CBS<sub>37</sub>-OBS<sub>2</sub>-BH<sub>26</sub> (Ms = 1), QM-A region, H<sub>S2B</sub>-to-Cys-H<sub>S5A</sub>-to-Arg359, r<sup>2</sup>SCAN**

|                                                                 | $\Delta E(\text{polarized QM})$ | $\Delta E(\text{QM/MM})$ | Mo    | Fe1   | Fe2   | Fe3   | Fe4   | Fe5   | Fe6   | Fe7   |
|-----------------------------------------------------------------|---------------------------------|--------------------------|-------|-------|-------|-------|-------|-------|-------|-------|
| BS124                                                           | 35.4                            | 35.0                     | -1.41 | -3.26 | -2.34 | 3.10  | -3.05 | 3.09  | 2.83  | 3.03  |
| BS134                                                           | 37.1                            | 37.1                     | -1.29 | -3.31 | 2.88  | -2.49 | -2.93 | 3.18  | 2.89  | 3.00  |
| BS257                                                           | 37.0                            | 36.6                     | 0.72  | 3.32  | -3.22 | 2.87  | 3.06  | -3.09 | 1.22  | -2.94 |
| BS356                                                           | 36.6                            | 35.9                     | 0.44  | 3.22  | 2.25  | -3.11 | 2.90  | -2.93 | -2.83 | 2.00  |
| BS3467                                                          | 28.2                            | 31.1                     | 0.05  | 3.32  | 3.16  | -2.44 | -3.02 | 3.02  | -1.35 | -1.55 |
| BS2356                                                          | 36.9                            | 37.8                     | 0.31  | 3.28  | -2.63 | -0.52 | 3.22  | -2.91 | -2.27 | 2.81  |
| BS357                                                           | 37.5                            | 35.5                     | 0.53  | 3.28  | 2.28  | -3.10 | 3.03  | -3.09 | 2.05  | -2.97 |
| BS367                                                           | 40.3                            | 40.2                     | 0.42  | 3.18  | 2.80  | -2.96 | 1.38  | 2.70  | -2.86 | -2.87 |
| BS456                                                           | 36.6                            | 40.8                     | 0.28  | 3.24  | 3.14  | 0.57  | -2.89 | -2.87 | -2.65 | 2.73  |
| BS156                                                           | 25.3                            | 27.5                     | 0.11  | -3.38 | 2.32  | 2.98  | 2.98  | -2.86 | -2.52 | 2.58  |
| BS157                                                           | 31.3                            | 31.0                     | 0.20  | -3.36 | 2.11  | 2.90  | 2.99  | -2.83 | 2.78  | -2.55 |
| BS167                                                           | 33.7                            | 33.5                     | 0.27  | -3.34 | 2.37  | 2.91  | 2.55  | 2.87  | -2.66 | -2.75 |
| BS235                                                           | 24.1                            | 27.2                     | -0.35 | 3.30  | -2.84 | -2.99 | 3.12  | -3.00 | 2.42  | 2.17  |
| BS247                                                           | 25.5                            | 30.1                     | -1.40 | 3.33  | -2.88 | 3.09  | -3.04 | 3.01  | 2.71  | -3.11 |
| BS346                                                           | 27.6                            | 27.9                     | -0.43 | 3.27  | 2.72  | -3.02 | -3.12 | 2.92  | -2.84 | 2.56  |
| BS236                                                           | 30.0                            | 31.9                     | -1.04 | 3.27  | -3.00 | -3.16 | 2.99  | 2.98  | -3.12 | 2.81  |
| BS237                                                           | 32.7                            | 33.6                     | -0.20 | 3.28  | -3.17 | -3.17 | 3.03  | 2.40  | 2.51  | -2.79 |
| BS245                                                           | 26.8                            | 30.6                     | -0.48 | 3.32  | -3.06 | 2.97  | -3.15 | -2.93 | 2.70  | 2.60  |
| BS246                                                           | 27.0                            | 30.6                     | -0.35 | 3.32  | -3.11 | 2.96  | -3.19 | 2.86  | -2.80 | 2.19  |
| BS345                                                           | 28.8                            | 28.7                     | -0.31 | 3.28  | 3.05  | -3.11 | -3.01 | -2.88 | 2.24  | 2.78  |
| BS347                                                           | 22.4                            | 25.9                     | -0.10 | 3.35  | 2.89  | -3.06 | -3.19 | 2.81  | 1.76  | -2.58 |
| BS126                                                           | 25.3                            | 30.8                     | -0.57 | -3.33 | -3.03 | 2.91  | 3.12  | 2.89  | -2.59 | 2.57  |
| BS145                                                           | 30.9                            | 31.1                     | -0.59 | -3.32 | 2.80  | 3.13  | -2.94 | -2.64 | 2.82  | 2.84  |
| BS125                                                           | 21.9                            | 26.7                     | -0.48 | -3.32 | -3.08 | 2.86  | 3.06  | -2.72 | 2.84  | 2.87  |
| BS127                                                           | 27.9                            | 31.0                     | -0.54 | -3.27 | -3.17 | 2.68  | 2.64  | 2.98  | 2.68  | -1.80 |
| BS135                                                           | 27.5                            | 27.5                     | -0.47 | -3.36 | 2.69  | -3.02 | 3.15  | -2.48 | 2.76  | 2.82  |
| BS136                                                           | 32.8                            | 33.6                     | -0.55 | -3.34 | 2.86  | -3.10 | 2.95  | 2.98  | -2.39 | 2.71  |
| BS146                                                           | 28.2                            | 28.9                     | -0.62 | -3.30 | 2.87  | 2.94  | -3.18 | 2.98  | -2.38 | 2.83  |
| BS147                                                           | 21.9                            | 24.7                     | -0.62 | -3.30 | 2.49  | 3.02  | -3.16 | 2.96  | 2.79  | -2.01 |
| BS147<br>(H <sub>S2B</sub> -to-hyd-H <sub>S5A</sub> -to-Arg359) | 27.1                            | 27.1                     | -0.61 | -3.30 | 2.57  | 3.05  | -3.16 | 2.93  | 2.76  | -2.04 |
| BS147<br>(H <sub>S2B</sub> -to-Cys-H <sub>S5A</sub> -to-Arg96)  | 20.5                            | 25.0                     | -0.63 | -3.30 | 2.48  | 3.02  | -3.16 | 2.96  | 2.81  | -2.00 |
| BS147<br>(H <sub>S2B</sub> -to-hyd-H <sub>S5A</sub> -to-Arg96)  | 22.0                            | 27.3                     | -0.62 | -3.30 | 2.58  | 3.03  | -3.17 | 2.92  | 2.77  | -2.00 |

**CBS<sub>37</sub>-OBS<sub>2</sub>-BH<sub>26</sub> (Ms = 0), QM-A region, H<sub>S2B</sub>-to-Cys-H<sub>S5A</sub>-to-Arg359, r<sup>2</sup>SCAN**

|                                                                                                  | $\Delta E(\text{polarized QM})$ | $\Delta E(\text{QM/MM})$ | Mo    | Fe1   | Fe2   | Fe3   | Fe4   | Fe5   | Fe6   | Fe7   |
|--------------------------------------------------------------------------------------------------|---------------------------------|--------------------------|-------|-------|-------|-------|-------|-------|-------|-------|
| BS1567                                                                                           | 28.8                            | 28.8                     | 1.27  | -2.90 | 2.79  | 3.16  | 3.28  | -2.83 | -2.57 | -2.64 |
| BS234                                                                                            | 23.4                            | 28.5                     | -1.29 | 2.91  | -2.85 | -3.15 | -3.28 | 2.86  | 2.58  | 2.66  |
| BS123                                                                                            | 29.2                            | 31.4                     | -1.30 | -3.36 | -3.03 | -3.18 | 2.92  | 2.96  | 2.61  | 2.74  |
| BS124                                                                                            | 28.5                            | 29.5                     | -1.31 | -3.25 | -3.00 | 2.90  | -3.24 | 2.91  | 2.55  | 2.91  |
| BS134                                                                                            | 33.2                            | 34.0                     | -1.24 | -3.32 | 2.75  | -3.11 | -3.17 | 3.04  | 2.86  | 2.72  |
| BS356                                                                                            | 35.1                            | 39.5                     | 0.46  | 3.14  | 0.12  | -3.01 | 3.13  | -2.91 | -3.02 | 1.89  |
| BS467                                                                                            | 48.2                            | 50.8                     | 0.32  | 0.84  | 2.74  | 2.66  | -3.18 | 2.48  | -2.85 | -2.76 |
| BS2356                                                                                           | 29.6                            | 29.1                     | 0.47  | 3.30  | -2.55 | -2.46 | 3.24  | -2.93 | -2.49 | 2.82  |
| BS2367                                                                                           | 34.4                            | 34.4                     | 0.39  | 3.34  | -2.65 | -3.05 | 3.12  | 3.05  | -2.10 | -2.71 |
| BS2357                                                                                           | 28.9                            | 32.1                     | 0.46  | 3.29  | -2.68 | -2.36 | 3.19  | -2.82 | 2.63  | -2.25 |
| BS3467                                                                                           | 28.1                            | 30.1                     | 0.40  | 3.32  | 3.15  | -2.46 | -2.94 | 2.72  | -2.67 | -2.05 |
| BS456                                                                                            | 34.7                            | 35.2                     | 0.30  | 3.28  | 3.18  | -2.14 | -2.66 | -2.51 | -2.60 | 2.60  |
| BS2457                                                                                           | 35.2                            | 37.5                     | 0.28  | 3.29  | -2.85 | 3.10  | -2.75 | -2.43 | 2.75  | -1.80 |
| BS157                                                                                            | 30.7                            | 35.6                     | 0.52  | -3.36 | 1.98  | 2.74  | 2.81  | -3.04 | 1.85  | -2.86 |
| BS167                                                                                            | 34.3                            | 39.4                     | 0.53  | -3.34 | 2.37  | 2.64  | 2.30  | 1.53  | -2.83 | -2.80 |
| BS2347                                                                                           | 33.8                            | 35.0                     | -0.25 | 3.35  | -2.40 | -1.85 | -2.71 | 2.96  | 2.67  | -2.27 |
| BS2345                                                                                           | 40.6                            | 39.8                     | -0.34 | 3.36  | -2.44 | -1.49 | -2.94 | -2.28 | 2.83  | 2.78  |
| BS345                                                                                            | 32.6                            | 31.0                     | -0.21 | 3.24  | 2.34  | -3.12 | -3.27 | -2.98 | 1.87  | 2.61  |
| BS347                                                                                            | 34.1                            | 33.6                     | -0.07 | 3.26  | 2.59  | -3.19 | -3.16 | 2.75  | 1.22  | -2.93 |
| BS1267                                                                                           | 32.8                            | 31.0                     | 0.16  | -3.24 | -2.34 | 3.11  | 3.27  | 3.01  | -1.84 | -2.62 |
| BS137                                                                                            | 38.4                            | 39.4                     | -0.37 | -3.34 | 2.34  | -3.12 | 3.07  | 2.53  | 2.27  | -2.86 |
| BS145                                                                                            | 34.1                            | 33.7                     | -0.57 | -3.33 | 2.79  | 3.06  | -3.14 | -2.92 | 2.51  | 2.25  |
| BS125                                                                                            | 28.1                            | 30.0                     | -0.44 | -3.32 | -3.10 | 2.40  | 2.94  | -2.84 | 2.44  | 2.45  |
| BS127                                                                                            | 34.9                            | 35.1                     | -0.33 | -3.29 | -3.17 | 2.15  | 2.69  | 2.52  | 2.58  | -2.60 |
| BS135                                                                                            | 32.3                            | 32.1                     | -0.28 | -3.35 | 2.51  | -3.03 | 3.04  | -2.98 | 1.85  | 2.71  |
| BS136                                                                                            | 34.4                            | 37.5                     | -0.32 | -3.30 | 2.89  | -3.11 | 2.83  | 2.46  | -2.71 | 1.66  |
| BS146                                                                                            | 29.2                            | 32.1                     | -0.49 | -3.30 | 2.67  | 2.32  | -3.20 | 2.82  | -2.63 | 2.33  |
| BS147                                                                                            | 29.4                            | 29.1                     | -0.51 | -3.30 | 2.53  | 2.51  | -3.24 | 2.93  | 2.51  | -2.83 |
|                                                                                                  |                                 |                          |       |       |       |       |       |       |       |       |
| <b>CBS<sub>37</sub>-OBS<sub>2</sub>-BH<sub>26</sub> (Ms = 1), QM-C region, r<sup>2</sup>SCAN</b> |                                 |                          |       |       |       |       |       |       |       |       |
| BS147                                                                                            | 22.1                            | 23.8                     | -0.61 | -3.30 | 2.50  | 3.02  | -3.15 | 2.97  | 2.79  | -2.00 |

Table S40. The relative polarized QM and QM/MM energies (kcal/mol) relative to the lowest-energy model (see Figure 2k in the manuscript) and Mulliken spin populations of Mo and 7 Fe ions for the **CBS<sub>37</sub>-OBS<sub>6</sub>-BH<sub>26</sub>** model.

| <b>CBS<sub>37</sub>-OBS<sub>6</sub>-BH<sub>26</sub> (Ms = 2), QM-A region, H<sub>S2B</sub>-to-homo-H<sub>S5A</sub>-to-Arg359, r<sup>2</sup>SCAN</b> |                                 |                          |       |       |       |       |       |       |       |       |
|-----------------------------------------------------------------------------------------------------------------------------------------------------|---------------------------------|--------------------------|-------|-------|-------|-------|-------|-------|-------|-------|
|                                                                                                                                                     | $\Delta E(\text{polarized QM})$ | $\Delta E(\text{QM/MM})$ | Mo    | Fe1   | Fe2   | Fe3   | Fe4   | Fe5   | Fe6   | Fe7   |
| BS567                                                                                                                                               | 32.0                            | 36.5                     | 1.35  | 2.90  | 2.36  | 3.05  | 3.20  | -3.07 | -3.18 | -2.76 |
| BS234                                                                                                                                               | 16.6                            | 20.7                     | -1.36 | 3.34  | -2.66 | -2.79 | -2.91 | 3.16  | 3.28  | 2.94  |
| BS123                                                                                                                                               | 22.1                            | 26.1                     | -1.18 | -3.30 | 2.06  | -3.20 | 2.70  | 2.83  | 2.18  | 2.32  |
| BS14                                                                                                                                                | 16.6                            | 20.4                     | -1.26 | -3.30 | 2.64  | 2.42  | -3.24 | 2.68  | 2.40  | 2.26  |
| BS257                                                                                                                                               | 16.1                            | 18.2                     | 0.28  | 3.34  | -3.17 | 2.83  | 3.04  | -2.97 | 3.01  | -2.68 |
| BS356                                                                                                                                               | 20.3                            | 23.6                     | 0.45  | 3.24  | 3.04  | -3.10 | 3.06  | -2.96 | -1.80 | 1.91  |
| BS467                                                                                                                                               | 14.5                            | 19.9                     | 0.49  | 3.32  | 2.90  | 2.93  | -3.18 | 2.90  | -2.98 | -2.58 |
| BS256                                                                                                                                               | 16.7                            | 19.0                     | 0.51  | 3.32  | -3.07 | 3.10  | 3.10  | -2.99 | -3.00 | 2.61  |
| BS267                                                                                                                                               | 17.1                            | 19.7                     | 0.44  | 3.31  | -3.07 | 2.97  | 3.13  | 2.72  | -3.13 | -2.79 |

|                                                                 |      |      |       |       |       |       |       |       |       |       |
|-----------------------------------------------------------------|------|------|-------|-------|-------|-------|-------|-------|-------|-------|
| BS357                                                           | 18.5 | 21.1 | 0.32  | 3.28  | 2.85  | -3.11 | 3.10  | -3.00 | 3.01  | -2.67 |
| BS367                                                           | 17.8 | 20.7 | 0.53  | 3.21  | 2.96  | -3.06 | 3.16  | 2.73  | -3.20 | -2.58 |
| BS456                                                           | 16.5 | 22.1 | 0.54  | 3.37  | 3.07  | 3.15  | -3.14 | -2.82 | -3.09 | 2.66  |
| BS457                                                           | 20.2 | 23.3 | 0.26  | 3.35  | 2.86  | 3.00  | -3.16 | -2.79 | 3.02  | -2.79 |
| BS156                                                           | 12.3 | 17.0 | 0.42  | -3.36 | 2.98  | 3.14  | 3.11  | -2.54 | -2.68 | 2.85  |
| BS157                                                           | 10.0 | 17.5 | 0.38  | -3.37 | 2.77  | 3.06  | 3.08  | -2.84 | 2.95  | -1.92 |
| BS167                                                           | 9.5  | 14.8 | 0.42  | -3.37 | 2.98  | 3.04  | 3.18  | 2.90  | -2.80 | -2.31 |
| BS235                                                           | 11.5 | 15.9 | -0.36 | 3.29  | -2.95 | -2.95 | 3.18  | -2.50 | 2.96  | 2.63  |
| BS247                                                           | 7.5  | 13.4 | -0.45 | 3.32  | -2.93 | 3.07  | -3.05 | 2.87  | 2.78  | -2.15 |
| BS247<br>(H <sub>52B</sub> -to-hyd-H <sub>55A</sub> -to-Arg359) | 7.9  | 13.5 | -0.44 | 3.32  | -2.93 | 3.08  | -3.06 | 2.89  | 2.78  | -2.15 |
| BS247<br>(H <sub>52B</sub> -to-homo-H <sub>55A</sub> -to-Arg96) | 6.9  | 13.1 | -0.45 | 3.32  | -2.93 | 3.09  | -3.06 | 2.87  | 2.77  | -2.14 |
| BS247<br>(H <sub>52B</sub> -to-hyd-H <sub>55A</sub> -to-Arg96)  | 7.3  | 13.2 | -0.43 | 3.32  | -2.93 | 3.09  | -3.07 | 2.88  | 2.77  | -2.16 |
| BS346                                                           | 11.3 | 14.8 | -0.26 | 3.27  | 3.17  | -2.85 | -3.06 | 3.02  | -2.60 | 2.71  |
| BS236                                                           | 14.8 | 18.3 | -0.26 | 3.27  | -2.67 | -2.99 | 3.14  | 2.88  | -2.95 | 2.83  |
| BS237                                                           | 9.0  | 14.0 | -0.41 | 3.33  | -3.09 | -3.12 | 3.12  | 2.89  | 2.98  | -2.33 |
| BS245                                                           | 14.6 | 19.8 | -0.54 | 3.29  | -2.98 | 3.08  | -2.76 | -2.51 | 3.15  | 2.68  |
| BS246                                                           | 13.5 | 17.4 | -0.28 | 3.27  | -2.52 | 3.12  | -3.01 | 3.02  | -3.05 | 2.75  |
| BS345                                                           | 18.5 | 21.7 | -0.49 | 3.33  | 3.10  | -2.57 | -3.11 | -2.71 | 3.16  | 2.78  |
| BS347                                                           | 8.2  | 13.8 | -0.34 | 3.31  | 3.09  | -3.01 | -3.15 | 2.96  | 2.97  | -2.21 |
| BS126                                                           | 21.0 | 25.9 | -0.39 | -3.19 | -1.13 | 3.00  | 3.14  | 2.93  | -3.08 | 2.56  |
| BS137                                                           | 13.3 | 18.2 | -0.56 | -3.27 | 2.94  | -2.89 | 3.22  | 3.06  | 3.15  | -1.95 |
| BS145                                                           | 17.9 | 22.3 | -0.68 | -3.26 | 3.16  | 3.21  | -2.77 | -2.23 | 3.28  | 2.92  |
| BS125                                                           | 24.9 | 28.9 | -0.65 | -3.20 | -1.00 | 2.96  | 2.97  | -2.89 | 3.10  | 2.73  |
| BS127                                                           | 12.5 | 17.8 | -0.60 | -3.28 | -3.01 | 3.07  | 3.27  | 3.14  | 3.03  | -2.02 |
| BS135                                                           | 20.1 | 23.8 | -0.54 | -3.31 | 3.24  | -2.70 | 3.15  | -2.36 | 3.30  | 2.83  |
| BS136                                                           | 19.4 | 23.0 | -0.29 | -3.32 | 3.10  | -2.45 | 3.28  | 3.14  | -2.70 | 2.84  |
| BS146                                                           | 20.3 | 23.8 | -0.33 | -3.27 | 3.14  | 3.27  | -2.75 | 3.05  | -2.55 | 3.00  |
| BS147                                                           | 14.5 | 19.0 | -0.73 | -3.27 | 3.24  | 3.04  | -3.00 | 3.03  | 3.28  | -1.82 |
|                                                                 |      |      |       |       |       |       |       |       |       |       |

**CBS<sub>37</sub>-OBS<sub>6</sub>-BH<sub>26</sub> (Ms = 1), QM-A region, H<sub>52B</sub>-to-homo-H<sub>55A</sub>-to-Arg359, r<sup>2</sup>SCAN**

|        | $\Delta E(\text{polarized QM})$ | $\Delta E(\text{QM/MM})$ | Mo    | Fe1   | Fe2   | Fe3   | Fe4   | Fe5   | Fe6   | Fe7   |
|--------|---------------------------------|--------------------------|-------|-------|-------|-------|-------|-------|-------|-------|
| BS567  | 38.2                            | 39.9                     | 1.36  | 1.10  | 2.81  | 2.77  | 3.05  | -3.12 | -3.03 | -2.84 |
| BS234  | 9.7                             | 14.6                     | -1.15 | 3.36  | -2.85 | -2.86 | -2.98 | 2.93  | 2.39  | 2.63  |
| BS123  | 17.4                            | 22.6                     | -1.38 | -3.35 | -2.96 | -3.02 | 3.22  | 3.08  | 3.18  | 2.93  |
| BS124  | 19.3                            | 21.7                     | -1.45 | -3.18 | -2.84 | 3.13  | -3.13 | 3.14  | 3.10  | 2.94  |
| BS134  | 22.5                            | 24.7                     | -1.36 | -3.33 | 3.15  | -2.54 | -2.84 | 3.15  | 2.72  | 2.91  |
| BS257  | 24.5                            | 27.8                     | 0.27  | 2.99  | -3.11 | 2.84  | 2.31  | -3.05 | 2.57  | -2.75 |
| BS356  | 18.4                            | 22.1                     | 0.76  | 3.19  | 2.83  | -3.05 | 2.99  | -3.07 | -3.18 | 1.72  |
| BS2467 | 19.3                            | 23.8                     | 0.10  | 3.32  | -2.38 | 3.13  | -3.00 | 3.02  | -1.98 | -0.96 |
| BS256  | 18.6                            | 22.3                     | 0.63  | 3.34  | -3.05 | 2.94  | 2.99  | -3.05 | -3.06 | 1.20  |
| BS267  | 27.6                            | 28.9                     | 0.58  | 3.34  | -3.14 | 2.61  | 2.90  | 1.83  | -3.22 | -2.94 |
| BS2357 | 15.9                            | 20.0                     | 0.10  | 3.26  | -2.20 | -2.46 | 3.27  | -2.82 | 3.06  | -1.10 |
| BS367  | 29.1                            | 31.5                     | 0.50  | 3.12  | 0.86  | -2.98 | 3.21  | 2.73  | -3.14 | -2.53 |
| BS456  | 18.3                            | 26.0                     | 0.58  | 3.35  | 2.88  | 3.05  | -3.19 | -2.99 | -3.03 | 1.36  |
| BS457  | 22.7                            | 26.0                     | 0.30  | 3.25  | 1.51  | 2.94  | -3.13 | -2.96 | 3.05  | -2.85 |
| BS156  | 8.8                             | 14.6                     | 0.34  | -3.38 | 2.92  | 3.00  | 3.03  | -2.76 | -2.93 | 2.18  |

|        |      |      |       |       |       |       |       |       |       |       |
|--------|------|------|-------|-------|-------|-------|-------|-------|-------|-------|
| BS157  | 11.7 | 16.1 | 0.23  | -3.37 | 2.69  | 2.84  | 2.98  | -2.92 | 2.79  | -2.69 |
| BS167  | 16.1 | 20.5 | 0.34  | -3.35 | 2.91  | 2.87  | 3.07  | 2.26  | -3.08 | -2.64 |
| BS235  | 8.3  | 15.3 | -0.47 | 3.31  | -3.00 | -3.01 | 3.14  | -2.99 | 2.81  | 1.90  |
| BS247  | 16.8 | 20.0 | -0.48 | 3.29  | -3.02 | 2.34  | -3.08 | 2.80  | 2.84  | -2.78 |
| BS346  | 8.2  | 15.4 | -0.38 | 3.28  | 3.15  | -2.92 | -3.05 | 2.89  | -3.17 | 2.08  |
| BS236  | 16.0 | 21.9 | -0.45 | 3.27  | -2.92 | -3.11 | 3.09  | 2.80  | -3.08 | 2.12  |
| BS237  | 14.8 | 18.8 | -0.39 | 3.29  | -3.15 | -3.19 | 2.99  | 2.34  | 2.77  | -2.79 |
| BS245  | 10.6 | 16.5 | -0.41 | 3.29  | -3.02 | 3.01  | -3.14 | -2.69 | 3.05  | 1.67  |
| BS246  | 10.8 | 17.0 | -0.40 | 3.28  | -2.90 | 2.97  | -3.14 | 2.93  | -3.02 | 2.12  |
| BS345  | 11.4 | 17.3 | -0.48 | 3.28  | 3.07  | -3.06 | -3.16 | -2.87 | 3.02  | 2.15  |
| BS2457 | 20.4 | 25.4 | 0.03  | 3.26  | -2.16 | 3.22  | -2.66 | -2.27 | 3.26  | -1.58 |
| BS126  | 12.4 | 17.5 | -0.36 | -3.29 | -3.08 | 2.95  | 3.17  | 2.95  | -2.98 | 2.57  |
| BS137  | 22.2 | 27.3 | -0.42 | -3.34 | 2.64  | -3.21 | 3.00  | 2.56  | 2.01  | -2.66 |
| BS145  | 15.1 | 19.8 | -0.63 | -3.32 | 2.94  | 3.11  | -3.10 | -2.53 | 3.01  | 2.68  |
| BS125  | 11.2 | 15.7 | -0.65 | -3.29 | -3.08 | 2.95  | 3.09  | -2.89 | 3.08  | 2.79  |
| BS127  | 17.3 | 22.1 | -0.45 | -3.26 | -3.15 | 2.87  | 3.07  | 2.44  | 2.66  | -2.13 |
| BS135  | 14.9 | 21.2 | -0.58 | -3.31 | 3.18  | -2.85 | 3.07  | -2.92 | 3.19  | 2.32  |
| BS136  | 16.0 | 19.1 | -0.51 | -3.33 | 3.00  | -2.92 | 3.07  | 2.95  | -2.96 | 2.73  |
| BS146  | 9.3  | 14.8 | -0.43 | -3.33 | 3.08  | 3.17  | -3.05 | 2.98  | -2.99 | 2.65  |
| BS147  | 11.9 | 17.1 | -0.55 | -3.30 | 2.81  | 2.91  | -3.15 | 2.97  | 2.46  | -1.90 |
|        |      |      |       |       |       |       |       |       |       |       |

**CBS<sub>37</sub>-OBS<sub>6</sub>-BH<sub>26</sub> (Ms = 0), QM-A region, H<sub>S2B</sub>-to-homo-H<sub>S5A</sub>-to-Arg359, r<sup>2</sup>SCAN**

|        | $\Delta E(\text{polarized QM})$ | $\Delta E(\text{QM/MM})$ | Mo    | Fe1   | Fe2   | Fe3   | Fe4   | Fe5   | Fe6   | Fe7   |
|--------|---------------------------------|--------------------------|-------|-------|-------|-------|-------|-------|-------|-------|
| BS1567 | 16.1                            | 18.8                     | 1.08  | -2.99 | 3.08  | 3.04  | 3.29  | -2.61 | -2.59 | -2.47 |
| BS234  | 10.9                            | 17.0                     | -0.67 | 3.38  | -2.84 | -2.88 | -2.90 | 2.92  | 2.87  | -0.47 |
| BS123  | 16.9                            | 22.8                     | -1.27 | -3.37 | -3.19 | -3.11 | 3.18  | 3.02  | 2.33  | 2.59  |
| BS124  | 17.8                            | 22.8                     | -1.41 | -3.41 | -2.98 | 3.03  | -3.24 | 2.91  | 2.88  | 2.58  |
| BS134  | 17.3                            | 21.0                     | -1.29 | -3.36 | 3.02  | -3.03 | -3.17 | 2.85  | 2.90  | 2.44  |
| BS2357 | 13.1                            | 17.5                     | 0.27  | 3.31  | -2.85 | -2.42 | 3.18  | -2.74 | 2.89  | -2.25 |
| BS2356 | 17.7                            | 21.1                     | 0.46  | 3.28  | -2.17 | -2.90 | 3.23  | -2.84 | -2.10 | 2.45  |
| BS2467 | 11.4                            | 17.6                     | 0.53  | 3.30  | -2.57 | 3.11  | -2.94 | 2.93  | -2.83 | -2.08 |
| BS2367 | 17.6                            | 22.8                     | 0.37  | 3.32  | -2.71 | -3.00 | 3.19  | 2.65  | -2.62 | -1.73 |
| BS3456 | 22.5                            | 25.1                     | 0.44  | 3.24  | 3.23  | -1.98 | -2.77 | -2.42 | -2.89 | 2.74  |
| BS2457 | 15.9                            | 22.0                     | 0.06  | 3.31  | -3.01 | 2.99  | -3.05 | -2.64 | 2.93  | -0.92 |
| BS156  | 17.4                            | 21.6                     | 0.39  | -3.36 | 2.81  | 1.62  | 2.91  | -2.90 | -2.90 | 2.11  |
| BS157  | 18.0                            | 20.8                     | 0.51  | -3.39 | 2.52  | 2.81  | 2.91  | -3.08 | 1.36  | -2.83 |
| BS167  | 23.2                            | 27.8                     | 0.75  | -3.37 | 2.86  | 2.80  | 2.57  | 0.66  | -3.08 | -2.74 |
| BS247  | 17.5                            | 21.7                     | -0.42 | 3.35  | -2.78 | -1.72 | -2.87 | 2.91  | 2.92  | -2.08 |
| BS237  | 29.9                            | 34.9                     | -0.22 | 3.28  | -3.13 | -3.19 | 2.35  | 1.54  | 2.26  | -2.77 |
| BS345  | 23.9                            | 28.7                     | -0.48 | 3.16  | 0.99  | -3.05 | -3.11 | -2.91 | 3.22  | 2.18  |
| BS126  | 18.0                            | 23.7                     | -0.27 | -3.31 | -3.12 | 2.91  | 3.07  | 2.63  | -2.84 | 1.24  |
| BS137  | 22.2                            | 27.3                     | -0.42 | -3.34 | 2.64  | -3.21 | 3.00  | 2.56  | 2.01  | -2.66 |
| BS145  | 17.3                            | 22.8                     | -0.40 | -3.32 | 2.69  | 3.03  | -3.17 | -2.64 | 2.66  | 1.66  |
| BS125  | 10.6                            | 17.1                     | -0.44 | -3.29 | -3.14 | 2.89  | 3.03  | -2.94 | 2.89  | 1.37  |
| BS127  | 22.5                            | 25.1                     | -0.49 | -3.24 | -3.23 | 1.92  | 2.80  | 2.44  | 2.93  | -2.74 |
| BS135  | 11.5                            | 17.5                     | -0.59 | -3.30 | 2.60  | -3.11 | 2.93  | -2.92 | 2.83  | 2.13  |
| BS136  | 15.9                            | 22.1                     | -0.09 | -3.31 | 3.02  | -2.96 | 3.09  | 2.72  | -2.90 | 0.73  |

|                                                                                                  |      |      |       |       |       |      |       |      |       |       |
|--------------------------------------------------------------------------------------------------|------|------|-------|-------|-------|------|-------|------|-------|-------|
| BS146                                                                                            | 13.4 | 17.7 | -0.32 | -3.33 | 2.91  | 2.73 | -3.19 | 2.82 | -2.90 | 1.87  |
| BS147                                                                                            | 17.6 | 21.3 | -0.49 | -3.28 | 2.13  | 2.88 | -3.24 | 2.85 | 2.10  | -2.38 |
| <b>CBS<sub>37</sub>-OBS<sub>6</sub>-BH<sub>26</sub> (Ms = 2), QM-C region, r<sup>2</sup>SCAN</b> |      |      |       |       |       |      |       |      |       |       |
| BS247                                                                                            | 11.6 | 14.5 | -0.41 | 3.31  | -2.90 | 3.10 | -3.03 | 2.85 | 2.75  | -2.20 |

Table S41. The relative polarized QM and QM/MM energies (kcal/mol) relative to the lowest-energy model (see Figure 2k in the manuscript) and Mulliken spin populations of Mo and 7 Fe ions for the **2CBS<sub>26,37</sub>-BH<sub>26(5)</sub>** model.

| <b>2CBS<sub>26,37</sub>-BH<sub>26(5)</sub> (Ms = 2), QM-A region, H<sub>S2B</sub>-to-Phe-H<sub>S5A</sub>-to-Arg359, r<sup>2</sup>SCAN</b> |                                 |                          |       |       |       |       |       |       |       |       |
|-------------------------------------------------------------------------------------------------------------------------------------------|---------------------------------|--------------------------|-------|-------|-------|-------|-------|-------|-------|-------|
|                                                                                                                                           | $\Delta E(\text{polarized QM})$ | $\Delta E(\text{QM/MM})$ | Mo    | Fe1   | Fe2   | Fe3   | Fe4   | Fe5   | Fe6   | Fe7   |
| BS13                                                                                                                                      | 18.1                            | 24.4                     | -1.17 | -3.31 | 2.85  | -3.07 | 2.89  | 3.04  | 2.04  | 1.01  |
| BS14                                                                                                                                      | 16.3                            | 20.3                     | -1.35 | -3.32 | 2.63  | 2.42  | -3.20 | 2.72  | 2.17  | 2.60  |
| BS14<br>(H <sub>S2B</sub> -to-Phe-H <sub>S5A</sub> -to-Arg96)                                                                             | 16.4                            | 21.0                     | -1.37 | -3.32 | 2.64  | 2.47  | -3.19 | 2.72  | 2.15  | 2.59  |
| BS14<br>(H <sub>S2B</sub> -to-Val-H <sub>S5A</sub> -to-Arg359)                                                                            | 21.6                            | 24.8                     | -1.39 | -3.31 | 2.60  | 2.41  | -3.20 | 2.71  | 2.23  | 2.61  |
| BS14<br>(H <sub>S2B</sub> -to-Val-H <sub>S5A</sub> -to-Arg96)                                                                             | 21.7                            | 25.5                     | -1.41 | -3.30 | 2.60  | 2.45  | -3.19 | 2.72  | 2.22  | 2.61  |
| BS257                                                                                                                                     | 27.1                            | 29.9                     | 0.30  | 3.34  | -2.92 | 2.95  | 3.08  | -2.93 | 2.31  | -2.70 |
| BS256                                                                                                                                     | 22.3                            | 26.2                     | 0.24  | 3.32  | -3.20 | 2.93  | 3.09  | -3.07 | -1.57 | 1.98  |
| BS267                                                                                                                                     | 30.7                            | 31.4                     | 0.41  | 3.34  | -3.19 | 2.82  | 2.70  | 2.54  | -2.03 | -3.00 |
| BS357                                                                                                                                     | 19.7                            | 23.5                     | 0.33  | 3.28  | 3.08  | -3.02 | 3.23  | -2.97 | 1.89  | -2.20 |
| BS457                                                                                                                                     | 22.1                            | 26.5                     | 0.28  | 3.33  | 3.16  | 3.23  | -3.03 | -2.55 | 1.85  | -2.66 |
| BS157                                                                                                                                     | 23.6                            | 25.8                     | 0.29  | -2.94 | 3.26  | 3.19  | 3.18  | -2.81 | 1.81  | -2.28 |
| BS167                                                                                                                                     | 22.3                            | 27.3                     | 0.38  | -3.37 | 2.84  | 3.07  | 3.20  | 2.98  | -2.49 | -2.55 |
| BS235                                                                                                                                     | 21.3                            | 25.6                     | -0.43 | 3.31  | -2.86 | -2.97 | 3.18  | -2.46 | 2.66  | 2.80  |
| BS247                                                                                                                                     | 16.0                            | 23.4                     | -0.38 | 3.31  | -2.74 | 3.12  | -3.03 | 2.87  | 2.43  | -2.28 |
| BS236                                                                                                                                     | 19.7                            | 25.0                     | -0.53 | 3.31  | -3.02 | -3.16 | 3.15  | 3.00  | -1.54 | 2.13  |
| BS245                                                                                                                                     | 23.1                            | 29.3                     | -0.56 | 3.30  | -2.75 | 3.10  | -2.72 | -2.63 | 2.78  | 2.87  |
| BS246                                                                                                                                     | 15.8                            | 22.2                     | -0.41 | 3.27  | -2.89 | 3.08  | -3.15 | 2.92  | -1.60 | 2.25  |
| BS345                                                                                                                                     | 27.2                            | 28.9                     | -0.53 | 3.26  | 3.13  | -2.23 | -2.60 | -2.55 | 2.13  | 2.93  |
| BS347                                                                                                                                     | 16.7                            | 21.0                     | -0.31 | 3.30  | 3.13  | -2.57 | -3.08 | 3.05  | 1.95  | -1.99 |
| BS126                                                                                                                                     | 16.8                            | 21.9                     | -0.57 | -3.29 | -3.00 | 2.95  | 3.19  | 3.04  | -1.18 | 2.61  |
| BS145                                                                                                                                     | 26.3                            | 31.3                     | 0.73  | -3.27 | 3.11  | 3.24  | -2.83 | -2.70 | 2.73  | 2.94  |
| BS135                                                                                                                                     | 28.5                            | 32.6                     | 0.56  | -3.28 | 3.08  | -2.53 | 3.14  | -2.86 | 2.85  | 2.91  |
| BS147                                                                                                                                     | 27.5                            | 31.9                     | -0.43 | -2.74 | 3.30  | 3.22  | -3.06 | 3.02  | 2.17  | -1.87 |
| <b>2CBS<sub>26,37</sub>-BH<sub>26(5)</sub> (Ms = 1), QM-A region, H<sub>S2B</sub>-to-Phe-H<sub>S5A</sub>-to-Arg359, r<sup>2</sup>SCAN</b> |                                 |                          |       |       |       |       |       |       |       |       |
|                                                                                                                                           | $\Delta E(\text{polarized QM})$ | $\Delta E(\text{QM/MM})$ | Mo    | Fe1   | Fe2   | Fe3   | Fe4   | Fe5   | Fe6   | Fe7   |
| BS2567                                                                                                                                    | 22.6                            | 25.9                     | 1.23  | 3.32  | -2.07 | 3.17  | 3.26  | -2.83 | -2.38 | -2.61 |
| BS134                                                                                                                                     | 26.7                            | 29.0                     | -1.40 | -3.34 | 3.17  | -2.19 | -2.78 | 3.13  | 2.35  | 3.03  |
| BS256                                                                                                                                     | 27.4                            | 30.6                     | 0.36  | 3.28  | -3.12 | 1.26  | 3.09  | -3.08 | -1.92 | 1.90  |
| BS267                                                                                                                                     | 38.0                            | 39.4                     | 0.80  | 3.32  | -3.08 | 2.79  | 2.54  | 0.68  | -2.42 | -2.98 |
| BS357                                                                                                                                     | 22.5                            | 24.4                     |       |       |       |       |       |       |       |       |
| BS457                                                                                                                                     | 21.4                            | 25.1                     | 0.51  | 3.35  | 3.03  | 3.12  | -3.17 | -3.05 | 1.06  | -2.83 |
| BS157                                                                                                                                     | 17.8                            | 22.8                     | 0.33  | -3.40 | 3.12  | 2.98  | 3.03  | -2.82 | 1.63  | -2.49 |
| BS346                                                                                                                                     | 17.3                            | 25.3                     | -0.28 | 3.27  | 2.87  | -2.97 | -3.07 | 2.81  | -2.66 | 2.02  |
| BS237                                                                                                                                     | 23.3                            | 26.4                     | -0.09 | 3.33  | -3.20 | -3.14 | 3.10  | 2.62  | 1.19  | -2.25 |



|                                                                                                                                           |                                 |                          |       |       |       |       |       |       |       |       |
|-------------------------------------------------------------------------------------------------------------------------------------------|---------------------------------|--------------------------|-------|-------|-------|-------|-------|-------|-------|-------|
| BS245                                                                                                                                     | 20.9                            | 27.6                     | -0.58 | 3.30  | -3.01 | 3.01  | -3.16 | -2.93 | 2.63  | 2.57  |
| BS246                                                                                                                                     | 19.8                            | 25.9                     | -0.07 | 3.31  | -2.93 | 2.96  | -3.12 | 2.86  | -1.71 | 0.25  |
| BS345                                                                                                                                     | 23.4                            | 28.8                     | -0.55 | 3.29  | 3.18  | -2.73 | -3.12 | -2.77 | 2.10  | 2.42  |
| BS137                                                                                                                                     | 17.1                            | 22.9                     | -0.47 | -3.32 | 3.01  | -3.09 | 3.07  | 2.99  | 1.93  | -2.03 |
| BS125                                                                                                                                     | 20.7                            | 25.8                     | -0.66 | -3.29 | -2.90 | 2.88  | 3.05  | -2.75 | 2.74  | 2.89  |
| BS135                                                                                                                                     | 23.0                            | 26.1                     | -0.50 | -3.33 | 2.86  | -2.87 | 3.13  | -2.50 | 2.30  | 2.99  |
| BS136                                                                                                                                     | 17.1                            | 22.9                     | -0.47 | -3.32 | 3.00  | -3.09 | 3.07  | 2.99  | 1.94  | -2.03 |
|                                                                                                                                           |                                 |                          |       |       |       |       |       |       |       |       |
| <b>2CBS<sub>26,37</sub>-BH<sub>26(5)</sub> (Ms = 0), QM-A region, H<sub>S2B</sub>-to-Phe-H<sub>S5A</sub>-to-Arg359, r<sup>2</sup>SCAN</b> |                                 |                          |       |       |       |       |       |       |       |       |
|                                                                                                                                           | $\Delta E(\text{polarized QM})$ | $\Delta E(\text{QM/MM})$ | Mo    | Fe1   | Fe2   | Fe3   | Fe4   | Fe5   | Fe6   | Fe7   |
| BS2567                                                                                                                                    | 19.3                            | 22.1                     | 1.28  | 3.32  | -3.17 | 3.02  | 3.17  | -3.01 | -2.14 | -2.81 |
| BS134                                                                                                                                     | 19.0                            | 22.1                     | -1.29 | -3.32 | 3.17  | -3.01 | -3.18 | 3.01  | 2.16  | 2.82  |
| BS2367                                                                                                                                    | 21.7                            | 25.0                     | 0.66  | 3.36  | -2.82 | -2.93 | 3.20  | 2.75  | -2.21 | -2.71 |
| BS357                                                                                                                                     | 35.4                            | 37.4                     | 0.57  | 2.42  | 2.67  | -3.14 | 2.83  | -3.09 | 1.03  | -2.88 |
| BS167                                                                                                                                     | 31.9                            | 36.9                     | 0.49  | -3.33 | 2.49  | 2.80  | 2.09  | 1.81  | -2.80 | -2.89 |
| BS246                                                                                                                                     | 15.6                            | 22.1                     | 0.53  | 3.32  | -2.82 | 3.08  | -3.07 | 2.88  | -2.07 | -2.38 |
| BS137                                                                                                                                     | 25.7                            | 29.9                     | -0.27 | -3.31 | 2.72  | -3.14 | 2.92  | 2.36  | 1.61  | -2.43 |
| BS145                                                                                                                                     | 21.2                            | 24.9                     | -0.69 | -3.36 | 2.86  | 2.95  | -3.20 | -2.76 | 2.21  | 2.69  |
| BS125                                                                                                                                     | 23.4                            | 29.1                     | -0.50 | -3.28 | -2.95 | 2.72  | 2.97  | -2.82 | 2.47  | 1.77  |
| BS136                                                                                                                                     | 26.7                            | 33.3                     | -0.23 | -3.30 | 2.80  | -3.11 | 2.88  | 2.44  | -2.55 | 1.61  |
|                                                                                                                                           |                                 |                          |       |       |       |       |       |       |       |       |
| <b>2CBS<sub>26,37</sub>-BH<sub>26(5)</sub> (Ms = 2), QM-C region, r<sup>2</sup>SCAN</b>                                                   |                                 |                          |       |       |       |       |       |       |       |       |
| BS14                                                                                                                                      | 24.0                            | 21.5                     | -1.36 | -3.32 | 2.62  | 2.35  | -3.20 | 2.71  | 2.25  | 2.64  |

Table S42. The relative polarized QM and QM/MM energies (kcal/mol) relative to the lowest-energy model (see Figure 2k in the manuscript) and Mulliken spin populations of Mo and 7 Fe ions for the **2CBS<sub>26,37</sub>-BH<sub>26(3)</sub>** model.

|                                                                                                                                           |                                 |                          |       |       |       |       |       |       |       |       |
|-------------------------------------------------------------------------------------------------------------------------------------------|---------------------------------|--------------------------|-------|-------|-------|-------|-------|-------|-------|-------|
| <b>2CBS<sub>26,37</sub>-BH<sub>26(3)</sub> (Ms = 2), QM-A region, H<sub>S2B</sub>-to-Phe-H<sub>S5A</sub>-to-Arg359, r<sup>2</sup>SCAN</b> |                                 |                          |       |       |       |       |       |       |       |       |
|                                                                                                                                           | $\Delta E(\text{polarized QM})$ | $\Delta E(\text{QM/MM})$ | Mo    | Fe1   | Fe2   | Fe3   | Fe4   | Fe5   | Fe6   | Fe7   |
| BS13                                                                                                                                      | 10.3                            | 25.7                     | -1.20 | -3.32 | 2.70  | -3.08 | 2.92  | 3.06  | 2.30  | 0.95  |
| BS14                                                                                                                                      | 9.9                             | 21.4                     | -1.42 | -3.30 | 2.21  | 2.47  | -3.20 | 2.75  | 2.58  | 2.56  |
| BS14<br>(H <sub>S2B</sub> -to-Phe-H <sub>S5A</sub> -to-Arg96)                                                                             | 11.9                            | 22.0                     | -1.46 | -3.28 | 1.53  | 2.70  | -3.15 | 2.73  | 2.90  | 2.62  |
| BS14<br>(H <sub>S2B</sub> -to-Val-H <sub>S5A</sub> -to-Arg359)                                                                            | 8.6                             | 18.4                     | -1.46 | -3.29 | 1.86  | 2.54  | -3.18 | 2.74  | 2.81  | 2.59  |
| BS14<br>(H <sub>S2B</sub> -to-Val-H <sub>S5A</sub> -to-Arg96)                                                                             | 9.5                             | 19.3                     | -1.48 | -3.28 | 1.69  | 2.65  | -3.16 | 2.74  | 2.85  | 2.60  |
| BS134                                                                                                                                     | 32.2                            | 42.3                     | -1.41 | -0.73 | 3.17  | -2.47 | -3.06 | 3.10  | 2.35  | 2.77  |
| BS257                                                                                                                                     | 20.6                            | 33.0                     | 0.37  | 3.31  | -3.05 | 2.97  | 3.09  | -2.93 | 2.40  | -2.62 |
| BS267                                                                                                                                     | 21.8                            | 30.1                     | 0.27  | 3.34  | -3.22 | 2.85  | 2.77  | 2.55  | -1.89 | -2.98 |
| BS357                                                                                                                                     | 12.2                            | 25.2                     | 0.40  | 3.29  | 3.14  | -3.00 | 3.27  | -2.95 | 1.75  | -2.30 |
| BS157                                                                                                                                     | 12.9                            | 25.3                     | 0.45  | -3.00 | 2.58  | 3.02  | 3.14  | -2.91 | 3.01  | -2.54 |
| BS235                                                                                                                                     | 15.4                            | 28.7                     | -0.34 | 3.28  | -2.61 | -2.94 | 3.20  | -2.54 | 2.59  | 2.69  |
| BS247                                                                                                                                     | 11.9                            | 26.5                     | -0.52 | 3.34  | -2.87 | 3.06  | -3.07 | 2.97  | 2.58  | -2.11 |
| BS236                                                                                                                                     | 14.9                            | 28.6                     | -0.33 | 3.33  | -2.19 | -3.10 | 3.20  | 3.01  | -2.74 | 2.22  |
| BS237                                                                                                                                     | 13.8                            | 26.7                     | -0.32 | 3.33  | -3.04 | -3.02 | 3.21  | 3.07  | 2.55  | -2.39 |
| BS245                                                                                                                                     | 18.8                            | 33.1                     | -0.45 | 3.32  | -2.84 | 3.13  | -2.77 | -2.63 | 2.75  | 2.78  |
| BS345                                                                                                                                     | 18.1                            | 29.4                     | -0.39 | 3.27  | 3.19  | -2.22 | -2.73 | -2.51 | 1.85  | 2.91  |
| BS347                                                                                                                                     | 12.4                            | 24.2                     | -0.45 | 3.31  | 2.87  | -2.39 | -3.08 | 3.08  | 2.35  | -2.11 |

|                                                                                                                                           |                                 |                          |       |       |       |       |       |       |       |       |
|-------------------------------------------------------------------------------------------------------------------------------------------|---------------------------------|--------------------------|-------|-------|-------|-------|-------|-------|-------|-------|
| BS127                                                                                                                                     | 15.4                            | 31.0                     | -0.61 | -3.29 | -2.87 | 3.03  | 3.29  | 3.19  | 2.70  | -1.71 |
| BS147                                                                                                                                     | 15.3                            | 30.8                     | 0.41  | -3.28 | 2.51  | 3.15  | -3.06 | 3.10  | 3.23  | -2.14 |
| <b>2CBS<sub>26,37</sub>-BH<sub>26(3)</sub> (Ms = 1), QM-A region, H<sub>S2B</sub>-to-Phe-H<sub>S5A</sub>-to-Arg359, r<sup>2</sup>SCAN</b> |                                 |                          |       |       |       |       |       |       |       |       |
|                                                                                                                                           | $\Delta E(\text{polarized QM})$ | $\Delta E(\text{QM/MM})$ | Mo    | Fe1   | Fe2   | Fe3   | Fe4   | Fe5   | Fe6   | Fe7   |
| BS2567                                                                                                                                    | 15.5                            | 27.2                     | 1.30  | 3.31  | -1.86 | 3.20  | 3.23  | -2.86 | -2.62 | -2.55 |
| BS134                                                                                                                                     | 17.5                            | 30.3                     | -1.43 | -3.34 | 3.17  | -2.45 | -2.62 | 3.26  | 2.38  | 2.94  |
| BS256                                                                                                                                     | 24.4                            | 33.6                     | 0.40  | 3.26  | -2.81 | 0.21  | 3.17  | -3.05 | -2.04 | 2.34  |
| BS267                                                                                                                                     | 23.5                            | 39.2                     | -0.66 | 3.28  | -3.13 | 2.97  | 1.63  | 2.85  | -2.37 | -2.89 |
| BS457                                                                                                                                     | 10.7                            | 25.7                     | 0.45  | 3.35  | 2.91  | 3.12  | -3.19 | -3.02 | 1.21  | -2.86 |
| BS236                                                                                                                                     | 18.5                            | 32.1                     | -0.20 | 3.27  | -2.37 | -3.20 | 3.04  | 2.29  | -2.82 | 1.76  |
| BS237                                                                                                                                     | 22.2                            | 34.5                     | -0.30 | 3.29  | -3.04 | -3.17 | 3.03  | 2.43  | 2.34  | -2.72 |
| BS245                                                                                                                                     | 16.3                            | 30.5                     | -0.49 | 3.33  | -2.97 | 3.04  | -3.19 | -2.96 | 2.53  | 2.43  |
| BS345                                                                                                                                     | 11.7                            | 26.2                     | -0.41 | 3.28  | 3.11  | -3.01 | -2.69 | -2.72 | 1.79  | 2.45  |
| BS126                                                                                                                                     | 16.3                            | 28.4                     | -0.66 | -3.32 | -2.95 | 2.56  | 2.71  | 2.98  | -1.80 | 2.49  |
| BS137                                                                                                                                     | 12.1                            | 26.1                     | -0.56 | -3.32 | 2.80  | -3.11 | 3.08  | 3.04  | 2.26  | -1.99 |
| BS145                                                                                                                                     | 12.7                            | 25.9                     | -0.55 | -3.29 | 3.10  | 3.17  | -2.93 | -2.45 | 2.13  | 2.82  |
| BS127                                                                                                                                     | 18.5                            | 32.6                     | -0.73 | -3.27 | -3.11 | 2.70  | 2.74  | 3.06  | 2.56  | -1.82 |
| BS146                                                                                                                                     | 14.5                            | 28.1                     | -0.46 | -3.36 | 2.92  | 3.14  | -3.19 | 2.95  | -2.29 | 2.59  |
| <b>2CBS<sub>26,37</sub>-BH<sub>26(3)</sub> (Ms = 0), QM-A region, H<sub>S2B</sub>-to-Phe-H<sub>S5A</sub>-to-Arg359, r<sup>2</sup>SCAN</b> |                                 |                          |       |       |       |       |       |       |       |       |
|                                                                                                                                           | $\Delta E(\text{polarized QM})$ | $\Delta E(\text{QM/MM})$ | Mo    | Fe1   | Fe2   | Fe3   | Fe4   | Fe5   | Fe6   | Fe7   |
| BS134                                                                                                                                     | 11.5                            | 23.8                     | -1.33 | -3.32 | 3.12  | -3.02 | -3.19 | 3.06  | 2.24  | 2.78  |
| BS2356                                                                                                                                    | 17.9                            | 25.6                     | 0.58  | 3.31  | -2.44 | -2.53 | 3.25  | -3.01 | -2.30 | 2.48  |
| BS1267                                                                                                                                    | 10.1                            | 24.3                     | 0.31  | -3.30 | -2.99 | 3.13  | 3.26  | 3.03  | -1.52 | -2.16 |
| BS2367                                                                                                                                    | 11.2                            | 23.8                     | 0.55  | 3.34  | -3.05 | -3.02 | 3.17  | 2.78  | -1.77 | -2.51 |
| BS3457                                                                                                                                    | 20.7                            | 34.2                     | 0.19  | 3.29  | 3.12  | -2.56 | -2.69 | -2.83 | 1.75  | -0.48 |
| BS2467                                                                                                                                    | 7.1                             | 21.7                     | 0.40  | 3.33  | -2.93 | 3.07  | -3.09 | 2.91  | -1.91 | -2.29 |
| BS345                                                                                                                                     | 9.9                             | 24.2                     | -0.36 | 3.30  | 3.00  | -3.14 | -3.25 | -3.02 | 1.50  | 2.20  |
| BS137                                                                                                                                     | 19.2                            | 32.8                     | -0.30 | -3.32 | 2.75  | -3.10 | 2.95  | 2.44  | 1.66  | -2.52 |
| BS145                                                                                                                                     | 10.7                            | 23.6                     | -0.57 | -3.35 | 3.07  | 3.02  | -3.18 | -2.80 | 1.77  | 2.55  |
| BS127                                                                                                                                     | 25.5                            | 37.4                     | -0.44 | -3.27 | -3.13 | 2.15  | 2.74  | 2.59  | 2.49  | -2.62 |
| BS135                                                                                                                                     | 7.2                             | 21.6                     | -0.45 | -3.34 | 2.94  | -3.08 | 3.08  | -2.90 | 1.92  | 2.31  |
| <b>2CBS<sub>26,37</sub>-BH<sub>26(3)</sub> (Ms = 2), QM-C region, r<sup>2</sup>SCAN</b>                                                   |                                 |                          |       |       |       |       |       |       |       |       |
| BS14                                                                                                                                      | 21.4                            | 21.5                     | -1.44 | -3.29 | 1.69  | 2.52  | -3.17 | 2.74  | 2.89  | 2.66  |

Table S43. The relative polarized QM and QM/MM energies (kcal/mol) relative to the lowest-energy model (see Figure 2k in the manuscript) and Mulliken spin populations of Mo and 7 Fe ions for the **2CBS<sub>26,37</sub>-BH<sub>37</sub>** model.

|                                                                                                                                        |                                 |                          |       |       |       |       |       |       |       |       |
|----------------------------------------------------------------------------------------------------------------------------------------|---------------------------------|--------------------------|-------|-------|-------|-------|-------|-------|-------|-------|
| <b>2CBS<sub>26,37</sub>-BH<sub>37</sub> (Ms = 2), QM-A region, H<sub>S2B</sub>-to-Phe-H<sub>S5A</sub>-to-Arg359, r<sup>2</sup>SCAN</b> |                                 |                          |       |       |       |       |       |       |       |       |
|                                                                                                                                        | $\Delta E(\text{polarized QM})$ | $\Delta E(\text{QM/MM})$ | Mo    | Fe1   | Fe2   | Fe3   | Fe4   | Fe5   | Fe6   | Fe7   |
| BS234                                                                                                                                  | 11.0                            | 18.4                     | -1.39 | 3.35  | -2.64 | -2.72 | -2.82 | 3.19  | 3.02  | 3.04  |
| BS124                                                                                                                                  | 26.5                            | 31.0                     | -1.37 | -2.64 | -2.69 | 3.31  | -2.78 | 3.22  | 2.98  | 3.26  |
| BS14                                                                                                                                   | 9.6                             | 15.9                     | -1.35 | -3.29 | 2.40  | 2.51  | -3.18 | 2.75  | 2.56  | 2.33  |
| BS257                                                                                                                                  | 13.5                            | 19.7                     | 0.44  | 3.38  | -3.09 | 3.08  | 3.22  | -2.90 | 2.13  | -2.58 |
| BS356                                                                                                                                  | 12.9                            | 18.0                     | 0.32  | 3.30  | 2.96  | -3.07 | 3.06  | -2.92 | -2.70 | 2.54  |

|                                                                 |      |      |       |       |       |       |       |       |       |       |
|-----------------------------------------------------------------|------|------|-------|-------|-------|-------|-------|-------|-------|-------|
| BS467                                                           | 10.1 | 17.9 | 0.48  | 3.30  | 2.98  | 2.93  | -3.18 | 2.85  | -2.73 | -2.77 |
| BS256                                                           | 10.4 | 14.9 | 0.30  | 3.36  | -3.02 | 2.06  | 3.25  | -2.99 | -2.20 | 2.76  |
| BS267                                                           | 16.1 | 21.3 | 0.52  | 3.32  | -3.04 | 2.06  | 3.20  | 2.96  | -2.73 | -2.75 |
| BS357                                                           | 14.8 | 20.2 | 0.37  | 3.27  | 3.14  | -3.09 | 3.15  | -3.09 | 1.72  | -1.92 |
| BS456                                                           | 12.7 | 20.6 | 0.34  | 3.35  | 3.21  | 3.08  | -3.03 | -2.53 | -2.65 | 1.90  |
| BS457                                                           | 15.0 | 22.0 | 0.41  | 3.33  | 3.16  | 3.12  | -3.15 | -2.95 | 2.72  | -2.81 |
| BS156                                                           | 8.1  | 15.4 | 0.21  | -3.36 | 3.00  | 3.23  | 3.06  | -2.83 | -2.48 | 3.03  |
| BS157                                                           | 5.7  | 14.9 | 0.44  | -3.40 | 3.15  | 3.04  | 3.07  | -2.78 | 3.02  | -2.54 |
| BS167                                                           | 5.3  | 13.4 | 0.34  | -3.40 | 3.04  | 3.04  | 3.20  | 3.00  | -2.52 | -2.64 |
| BS235                                                           | 6.2  | 13.0 | -0.40 | 3.31  | -2.95 | -3.01 | 3.18  | -2.47 | 2.76  | 2.80  |
| BS247                                                           | 7.5  | 14.0 | -0.32 | 3.26  | -2.86 | 3.08  | -3.03 | 2.95  | 2.64  | -2.21 |
| BS346                                                           | 3.6  | 10.5 | -0.45 | 3.33  | 3.11  | -2.96 | -3.05 | 2.87  | -2.16 | 2.67  |
| BS346<br>(H <sub>S2B</sub> -to-Phe-H <sub>S5A</sub> -to-Arg96)  | 6.6  | 14.8 | -0.46 | 3.33  | 3.11  | -2.97 | -3.05 | 2.88  | -2.17 | 2.72  |
| BS346<br>(H <sub>S2B</sub> -to-Val-H <sub>S5A</sub> -to-Arg359) | 8.8  | 15.6 | -0.42 | 3.33  | 3.11  | -2.96 | -3.05 | 2.88  | -2.24 | 2.75  |
| BS346<br>(H <sub>S2B</sub> -to-Val-H <sub>S5A</sub> -to-Arg96)  | 5.6  | 11.1 | -0.41 | 3.34  | 3.11  | -2.95 | -3.05 | 2.87  | -2.23 | 2.69  |
| BS236                                                           | 10.1 | 15.9 | -0.36 | 3.33  | -3.18 | -3.17 | 3.14  | 2.99  | -2.16 | 2.73  |
| BS237                                                           | 12.6 | 20.2 | -0.32 | 3.31  | -3.14 | -3.02 | 3.10  | 2.44  | 2.54  | -1.52 |
| BS245                                                           | 15.0 | 22.4 | -0.52 | 3.28  | -2.27 | 2.92  | -2.58 | -2.51 | 2.92  | 2.33  |
| BS246                                                           | 11.6 | 16.5 | -0.50 | 3.33  | -2.55 | 2.08  | -3.08 | 3.03  | -1.60 | 2.84  |
| BS345                                                           | 9.0  | 15.7 | -0.51 | 3.31  | 3.12  | -2.93 | -2.74 | -2.65 | 2.85  | 2.89  |
| BS347                                                           | 9.3  | 16.8 | -0.43 | 3.30  | 3.13  | -3.00 | -3.16 | 2.93  | 1.93  | -1.19 |
| BS126                                                           | 13.1 | 19.4 | -0.41 | -3.28 | -2.93 | 3.28  | 3.24  | 3.04  | -2.51 | 3.05  |
| BS137                                                           | 10.4 | 18.2 | -0.69 | -3.30 | 2.88  | -2.93 | 3.05  | 3.03  | 2.76  | -1.05 |
| BS145                                                           | 16.5 | 22.9 | -0.41 | -3.27 | 3.21  | 3.35  | -2.89 | -2.48 | 2.93  | 3.08  |
| BS125                                                           | 13.1 | 19.3 | -0.41 | -3.33 | -2.80 | 3.34  | 3.19  | -2.51 | 2.89  | 3.12  |
| BS127                                                           | 14.0 | 20.0 | -0.39 | -3.35 | -2.75 | 3.11  | 3.30  | 3.12  | 2.83  | -2.11 |
| BS135                                                           | 13.3 | 20.8 | -0.49 | -3.27 | 3.25  | -2.51 | 3.14  | -2.43 | 3.00  | 2.85  |
| BS136                                                           | 12.2 | 18.2 | -0.62 | -3.27 | 3.06  | -2.90 | 3.26  | 3.13  | -1.77 | 2.77  |
| BS146                                                           | 13.2 | 18.9 | -0.57 | -3.31 | 3.09  | 3.37  | -3.14 | 2.99  | -1.78 | 3.10  |
| BS147                                                           | 24.5 | 29.1 | -0.45 | -1.98 | 3.16  | 3.09  | -3.05 | 2.92  | 2.64  | -2.50 |

**2CBS<sub>26,37</sub>-BH<sub>37</sub> (M<sub>S</sub> = 1), QM-A region, H<sub>S2B</sub>-to-Phe-H<sub>S5A</sub>-to-Arg359, r<sup>2</sup>SCAN**

|        | $\Delta E(\text{polarized QM})$ | $\Delta E(\text{QM/MM})$ | Mo    | Fe1   | Fe2   | Fe3   | Fe4   | Fe5   | Fe6   | Fe7   |
|--------|---------------------------------|--------------------------|-------|-------|-------|-------|-------|-------|-------|-------|
| BS3567 | 12.7                            | 18.8                     | 1.23  | 3.28  | 3.17  | -2.04 | 3.25  | -2.84 | -2.57 | -2.45 |
| BS234  | 10.2                            | 17.9                     | -1.18 | 3.35  | -2.86 | -2.89 | -2.93 | 2.77  | 2.64  | 2.63  |
| BS256  | 11.7                            | 17.6                     | 0.44  | 3.35  | -3.05 | 1.59  | 3.15  | -3.09 | -2.85 | 2.29  |
| BS367  | 24.0                            | 30.3                     | 0.46  | 3.31  | 2.85  | -3.24 | 2.46  | 2.17  | -2.97 | -3.03 |
| BS456  | 11.4                            | 19.3                     | 0.55  | 3.37  | 3.10  | 2.97  | -3.17 | -3.04 | -2.84 | 1.09  |
| BS156  | 6.1                             | 15.4                     | 0.37  | -3.40 | 2.96  | 3.11  | 3.03  | -2.84 | -2.48 | 1.60  |
| BS157  | 10.1                            | 16.9                     | 0.40  | -3.39 | 3.09  | 2.98  | 3.02  | -2.94 | 2.05  | -2.73 |
| BS167  | 13.3                            | 21.4                     | 0.42  | -3.36 | 2.95  | 2.88  | 2.21  | 2.78  | -2.67 | -2.78 |
| BS235  | 8.7                             | 14.6                     | -0.42 | 3.33  | -2.99 | -3.04 | 3.15  | -3.01 | 1.97  | 2.65  |
| BS247  | 9.0                             | 14.4                     | -0.23 | 3.28  | -2.91 | 3.02  | -3.03 | 2.80  | 1.83  | -2.84 |
| BS346  | 4.4                             | 13.4                     | -1.41 | 3.33  | 3.12  | -2.98 | -3.08 | 2.96  | -3.12 | 2.76  |
| BS236  | 11.6                            | 18.1                     | -0.37 | 3.31  | -3.21 | -3.19 | 3.04  | 2.45  | -2.87 | 2.57  |
| BS237  | 16.6                            | 22.5                     | -0.20 | 3.31  | -3.18 | -2.79 | 3.07  | 2.31  | 1.75  | -2.68 |

|                                                                                                                                        |                                 |                          |       |       |       |       |       |       |       |       |
|----------------------------------------------------------------------------------------------------------------------------------------|---------------------------------|--------------------------|-------|-------|-------|-------|-------|-------|-------|-------|
| BS245                                                                                                                                  | 12.2                            | 20.5                     | -0.49 | 3.32  | -3.01 | 2.00  | -2.80 | -2.70 | 2.90  | 2.58  |
| BS246                                                                                                                                  | 10.1                            | 17.4                     | -0.27 | 3.35  | -3.13 | 1.77  | -3.21 | 2.90  | -2.15 | 2.48  |
| BS345                                                                                                                                  | 9.1                             | 14.8                     | -0.42 | 3.32  | 3.05  | -3.13 | -3.22 | -2.88 | 2.30  | 2.79  |
| BS126                                                                                                                                  | 9.5                             | 16.7                     | -0.45 | -3.31 | -2.94 | 3.10  | 3.18  | 2.99  | -2.35 | 1.71  |
| BS145                                                                                                                                  | 10.8                            | 18.5                     | -0.61 | -3.31 | 3.17  | 2.84  | -2.96 | -2.45 | 2.87  | 2.62  |
| BS125                                                                                                                                  | 11.4                            | 18.5                     | -0.51 | -3.33 | -3.13 | 3.15  | 3.07  | -2.87 | 2.67  | 2.97  |
| BS127                                                                                                                                  | 12.6                            | 18.4                     | -0.37 | -3.35 | -3.10 | 2.98  | 3.05  | 2.95  | 2.67  | -2.58 |
| BS135                                                                                                                                  | 7.3                             | 13.8                     | -0.57 | -3.29 | 2.87  | -3.02 | 3.02  | -2.76 | 2.87  | 2.85  |
| BS136                                                                                                                                  | 12.2                            | 18.5                     | -0.60 | -3.27 | 2.88  | -3.07 | 2.77  | 2.90  | -2.27 | 2.68  |
| BS146                                                                                                                                  | 8.1                             | 14.8                     | -0.53 | -3.33 | 3.02  | 2.67  | -3.20 | 2.92  | -1.63 | 2.47  |
| BS147                                                                                                                                  | 9.1                             | 15.0                     | -0.45 | -3.34 | 3.16  | 3.09  | -3.17 | 2.91  | 2.64  | -2.51 |
|                                                                                                                                        |                                 |                          |       |       |       |       |       |       |       |       |
| <b>2CBS<sub>26,37</sub>-BH<sub>37</sub> (Ms = 0), QM-A region, H<sub>S2B</sub>-to-Phe-H<sub>S5A</sub>-to-Arg359, r<sup>2</sup>SCAN</b> |                                 |                          |       |       |       |       |       |       |       |       |
|                                                                                                                                        | $\Delta E(\text{polarized QM})$ | $\Delta E(\text{QM/MM})$ | Mo    | Fe1   | Fe2   | Fe3   | Fe4   | Fe5   | Fe6   | Fe7   |
| BS1567                                                                                                                                 | 15.6                            | 20.5                     | 1.16  | -2.88 | 3.17  | 3.17  | 3.22  | -2.86 | -2.53 | -2.67 |
| BS234                                                                                                                                  | 15.2                            | 20.5                     | -1.18 | 2.89  | -3.16 | -3.19 | -3.22 | 2.87  | 2.58  | 2.65  |
| BS123                                                                                                                                  | 12.8                            | 20.7                     | -1.33 | -3.34 | -3.20 | -3.14 | 3.00  | 2.93  | 2.66  | 2.61  |
| BS124                                                                                                                                  | 7.9                             | 14.8                     | -1.29 | -3.25 | -3.02 | 3.11  | -3.16 | 3.04  | 2.79  | 2.17  |
| BS257                                                                                                                                  | 25.9                            | 30.6                     | 0.44  | 1.80  | -3.10 | 1.60  | 2.99  | -2.93 | 2.11  | -2.69 |
| BS2356                                                                                                                                 | 15.9                            | 20.2                     | 0.29  | 3.31  | -2.51 | -2.93 | 3.18  | -2.73 | -2.00 | 2.66  |
| BS256                                                                                                                                  | 27.1                            | 32.2                     | 0.41  | 1.96  | -3.09 | 1.58  | 3.03  | -3.08 | -2.84 | 2.32  |
| BS2357                                                                                                                                 | 11.1                            | 17.6                     | 0.43  | 3.32  | -2.47 | -2.72 | 3.23  | -2.95 | 2.47  | -2.00 |
| BS2367                                                                                                                                 | 13.8                            | 20.8                     | 0.53  | 3.34  | -3.15 | -2.90 | 3.14  | 2.75  | -2.35 | -2.07 |
| BS3456                                                                                                                                 | 14.3                            | 19.5                     | 0.12  | 3.32  | 3.12  | -2.96 | -2.96 | -2.52 | -1.36 | 2.76  |
| BS157                                                                                                                                  | 14.7                            | 20.3                     | 0.72  | -3.39 | 2.93  | 2.88  | 2.91  | -2.94 | 0.19  | -2.76 |
| BS167                                                                                                                                  | 18.8                            | 26.4                     | 0.54  | -3.35 | 2.73  | 2.77  | 2.02  | 1.63  | -2.84 | -2.88 |
| BS2346                                                                                                                                 | 18.8                            | 24.1                     | -0.37 | 3.33  | -1.40 | -2.70 | -2.84 | 2.92  | -2.38 | 2.71  |
| BS236                                                                                                                                  | 27.0                            | 32.4                     | -0.33 | 1.88  | -3.18 | -3.18 | 2.81  | 2.42  | -2.83 | 2.55  |
| BS245                                                                                                                                  | 13.2                            | 20.5                     | -0.36 | 3.34  | -3.13 | 1.91  | -3.15 | -2.98 | 2.18  | 2.40  |
| BS3467                                                                                                                                 | 7.5                             | 15.6                     | 0.42  | 3.33  | 3.07  | -2.79 | -3.11 | 2.93  | -2.25 | -2.13 |
| BS1367                                                                                                                                 | 13.3                            | 20.5                     | 0.28  | -3.34 | 3.13  | -1.96 | 3.15  | 3.00  | -2.12 | -2.36 |
| BS145                                                                                                                                  | 13.6                            | 20.5                     | -0.64 | -3.35 | 3.03  | 2.76  | -3.17 | -2.78 | 2.61  | 2.30  |
| BS125                                                                                                                                  | 7.5                             | 15.5                     | -0.46 | -3.33 | -3.07 | 2.83  | 3.10  | -2.92 | 2.27  | 2.11  |
| BS127                                                                                                                                  | 15.1                            | 19.8                     | -0.07 | -3.32 | -3.08 | 3.02  | 3.08  | 2.68  | 0.77  | -2.71 |
| BS135                                                                                                                                  | 14.5                            | 19.8                     | -0.39 | -3.28 | 2.72  | -3.03 | 2.93  | -2.82 | 1.51  | 2.70  |
| BS136                                                                                                                                  | 16.8                            | 22.5                     | -0.39 | -3.25 | 2.13  | -3.14 | 2.62  | 2.36  | -2.61 | 2.62  |
| BS146                                                                                                                                  | 11.0                            | 17.6                     | -0.45 | -3.32 | 2.52  | 2.72  | -3.24 | 2.94  | -2.47 | 2.00  |
| BS147                                                                                                                                  | 15.6                            | 20.2                     | -0.32 | -3.32 | 2.52  | 2.94  | -3.18 | 2.73  | 2.02  | -2.65 |
|                                                                                                                                        |                                 |                          |       |       |       |       |       |       |       |       |
| <b>2CBS<sub>26,37</sub>-BH<sub>37</sub> (Ms = 2), QM-C region, r<sup>2</sup>SCAN</b>                                                   |                                 |                          |       |       |       |       |       |       |       |       |
| BS346                                                                                                                                  | 16.5                            | 17.8                     | -0.39 | 3.32  | 3.12  | -2.85 | -3.04 | 2.86  | -2.21 | 2.57  |

Table S44. The relative polarized QM and QM/MM energies (kcal/mol) relative to the lowest-energy model (see Figure 2k in the manuscript) and Mulliken spin populations of Mo and 7 Fe ions for the **CBS<sub>26</sub>-BH<sub>26</sub>-TH<sub>5</sub>** model.

| <b>CBS<sub>26</sub>-BH<sub>26</sub>-TH<sub>5</sub> (Ms = 2), QM-A region, r<sup>2</sup>SCAN</b> |                                 |                          |    |     |     |     |     |     |     |     |
|-------------------------------------------------------------------------------------------------|---------------------------------|--------------------------|----|-----|-----|-----|-----|-----|-----|-----|
|                                                                                                 | $\Delta E(\text{polarized QM})$ | $\Delta E(\text{QM/MM})$ | Mo | Fe1 | Fe2 | Fe3 | Fe4 | Fe5 | Fe6 | Fe7 |

|                                                                                                 |                                 |                          |       |       |       |       |       |       |       |       |
|-------------------------------------------------------------------------------------------------|---------------------------------|--------------------------|-------|-------|-------|-------|-------|-------|-------|-------|
| BS13                                                                                            | 16.8                            | 17.8                     | -1.10 | -3.23 | 2.58  | -3.19 | 2.61  | 2.18  | 1.99  | 2.59  |
| BS14                                                                                            | 24.2                            | 24.6                     | -1.18 | -3.27 | 2.49  | 2.55  | -3.16 | 2.07  | 2.17  | 2.83  |
| BS256                                                                                           | 36.8                            | 35.5                     | 0.28  | 3.23  | -3.04 | 1.42  | 3.04  | -2.49 | -1.92 | 2.71  |
| BS357                                                                                           | 28.0                            | 27.0                     | 0.20  | 3.31  | 3.12  | -3.10 | 3.25  | -2.41 | 2.03  | -2.83 |
| BS457                                                                                           | 22.3                            | 23.3                     | 0.25  | 3.32  | 3.05  | 3.28  | -3.04 | -2.24 | 1.97  | -2.84 |
| BS157                                                                                           | 27.7                            | 27.7                     | 0.23  | -2.89 | 2.93  | 2.97  | 3.12  | -2.08 | 2.21  | -2.70 |
| BS236                                                                                           | 16.4                            | 16.2                     | -0.33 | 3.32  | -3.07 | -3.24 | 3.13  | 2.31  | -1.44 | 2.78  |
| BS246                                                                                           | 22.3                            | 23.1                     | -0.30 | 3.25  | -2.96 | 3.18  | -3.11 | 2.24  | -1.54 | 2.75  |
| BS345                                                                                           | 20.4                            | 21.4                     | -0.59 | 3.30  | 2.91  | -2.99 | -2.69 | -2.01 | 2.50  | 3.00  |
| BS126                                                                                           | 16.9                            | 17.8                     | -0.46 | -3.30 | -2.96 | 3.21  | 3.06  | 2.32  | -0.96 | 2.84  |
| BS145                                                                                           | 26.8                            | 27.8                     | -0.40 | -3.30 | 3.13  | 3.34  | -2.56 | -1.94 | 2.31  | 3.09  |
| BS135                                                                                           | 28.4                            | 29.2                     | -0.57 | -3.25 | 3.21  | -2.86 | 3.19  | -1.71 | 2.43  | 3.03  |
| BS17                                                                                            | 25.9                            | 27.2                     | -0.07 | -3.37 | 2.98  | 2.77  | 2.34  | 1.66  | 1.20  | -2.88 |
|                                                                                                 |                                 |                          |       |       |       |       |       |       |       |       |
| <b>CBS<sub>26</sub>-BH<sub>26</sub>-TH<sub>5</sub> (Ms = 1), QM-A region, r<sup>2</sup>SCAN</b> |                                 |                          |       |       |       |       |       |       |       |       |
|                                                                                                 | $\Delta E(\text{polarized QM})$ | $\Delta E(\text{QM/MM})$ | Mo    | Fe1   | Fe2   | Fe3   | Fe4   | Fe5   | Fe6   | Fe7   |
| BS2567                                                                                          | 28.2                            | 28.3                     | 1.07  | 3.39  | -2.98 | 3.33  | 3.23  | -2.33 | -1.99 | -2.63 |
| BS134                                                                                           | 31.9                            | 32.5                     | -1.21 | -2.60 | 3.13  | -2.76 | -2.26 | 2.34  | 2.26  | 3.02  |
| BS2356                                                                                          | 25.8                            | 24.8                     | 0.03  | 3.31  | -2.68 | -2.92 | 3.12  | -1.75 | -1.08 | 2.97  |
| BS267                                                                                           | 34.2                            | 34.1                     | 0.58  | 3.20  | -3.01 | 2.95  | 1.65  | 1.87  | -2.28 | -3.02 |
| BS357                                                                                           | 28.5                            | 28.4                     | 0.36  | 3.35  | 2.80  | -3.23 | 2.72  | -2.41 | 1.18  | -2.77 |
| BS457                                                                                           | 31.2                            | 31.3                     | 0.26  | 3.04  | 2.82  | 2.37  | -3.05 | -2.24 | 1.74  | -2.86 |
| BS157                                                                                           | 20.2                            | 21.6                     | 0.42  | -3.37 | 3.07  | 2.90  | 2.92  | -2.24 | 1.32  | -2.68 |
| BS236                                                                                           | 16.6                            | 18.4                     | -1.43 | 3.32  | -3.19 | -3.28 | 3.02  | 2.41  | -2.28 | 2.98  |
| BS246                                                                                           | 26.4                            | 27.5                     | -0.21 | 3.25  | -3.13 | 2.72  | -3.21 | 2.26  | -1.84 | 2.10  |
| BS347                                                                                           | 23.2                            | 23.2                     | -0.30 | 3.30  | 3.02  | -3.12 | -2.93 | 3.00  | 1.61  | -2.61 |
| BS126                                                                                           | 22.7                            | 23.5                     | -0.39 | -3.29 | -2.94 | 2.68  | 2.75  | 2.18  | -1.94 | 2.86  |
| BS137                                                                                           | 23.3                            | 23.3                     | -0.41 | -3.26 | 3.18  | -2.82 | 3.13  | 2.35  | 1.97  | -2.03 |
| BS145                                                                                           | 22.9                            | 22.9                     | -0.63 | -3.32 | 2.76  | 3.09  | -2.97 | -2.11 | 2.27  | 2.98  |
| BS135                                                                                           | 21.9                            | 22.4                     | -0.60 | -3.26 | 2.69  | -3.13 | 3.05  | -1.89 | 2.16  | 2.91  |
| BS147                                                                                           | 23.7                            | 23.9                     | -0.31 | -3.33 | 3.18  | 3.21  | -2.82 | 2.42  | 2.24  | -2.37 |
|                                                                                                 |                                 |                          |       |       |       |       |       |       |       |       |
| <b>CBS<sub>26</sub>-BH<sub>26</sub>-TH<sub>5</sub> (Ms = 0), QM-A region, r<sup>2</sup>SCAN</b> |                                 |                          |       |       |       |       |       |       |       |       |
|                                                                                                 | $\Delta E(\text{polarized QM})$ | $\Delta E(\text{QM/MM})$ | Mo    | Fe1   | Fe2   | Fe3   | Fe4   | Fe5   | Fe6   | Fe7   |
| BS2567                                                                                          | 26.9                            | 27.3                     | 1.13  | 3.35  | -3.14 | 3.15  | 2.54  | -2.34 | -2.13 | -2.87 |
| BS134                                                                                           | 26.7                            | 27.2                     | -1.14 | -3.37 | 3.15  | -3.14 | -2.54 | 2.32  | 2.16  | 2.89  |
| BS2456                                                                                          | 22.0                            | 22.1                     | 0.34  | 3.26  | -2.84 | 3.27  | -2.98 | -2.38 | -1.91 | 2.68  |
| BS1256                                                                                          | 22.5                            | 22.1                     | 0.16  | -3.30 | -3.02 | 3.19  | 3.15  | -2.02 | -1.42 | 2.91  |
| BS2356                                                                                          | 19.9                            | 18.8                     | 0.32  | 3.33  | -2.79 | -3.06 | 3.16  | -2.53 | -2.07 | 2.84  |
| BS347                                                                                           | 22.4                            | 22.2                     | -0.18 | 3.30  | 3.03  | -3.18 | -3.15 | 1.98  | 1.44  | -2.89 |
| BS126                                                                                           | 36.2                            | 37.2                     | -0.11 | -3.28 | -3.15 | 2.45  | 2.56  | 2.17  | -2.01 | 1.56  |
| BS137                                                                                           | 22.0                            | 22.0                     | -0.36 | -3.27 | 2.90  | -3.27 | 3.00  | 2.35  | 1.91  | -2.68 |
| BS145                                                                                           | 30.1                            | 29.4                     | -0.35 | -3.32 | 2.80  | 3.06  | -2.99 | -2.44 | 1.38  | 2.17  |
|                                                                                                 |                                 |                          |       |       |       |       |       |       |       |       |
| <b>CBS<sub>26</sub>-BH<sub>26</sub>-TH<sub>5</sub> (Ms = 2), QM-C region, r<sup>2</sup>SCAN</b> |                                 |                          |       |       |       |       |       |       |       |       |
| BS236                                                                                           | 23.0                            | 19.9                     | -0.26 | 3.31  | -2.94 | -3.21 | 3.11  | 2.25  | -1.60 | 2.76  |

Table S45. The relative polarized QM and QM/MM energies (kcal/mol) relative to the lowest-energy model (see Figure 2k in the manuscript) and Mulliken spin populations of Mo and 7 Fe ions for the **CBS<sub>26</sub>-2TH<sub>4,5</sub>** model.

| <b>CBS<sub>26</sub>-2TH<sub>4,5</sub> (Ms = 2), QM-A region, r<sup>2</sup>SCAN</b> |                                 |                          |              |             |             |              |              |              |             |             |
|------------------------------------------------------------------------------------|---------------------------------|--------------------------|--------------|-------------|-------------|--------------|--------------|--------------|-------------|-------------|
|                                                                                    | $\Delta E(\text{polarized QM})$ | $\Delta E(\text{QM/MM})$ | Mo           | Fe1         | Fe2         | Fe3          | Fe4          | Fe5          | Fe6         | Fe7         |
| BS567                                                                              | 34.2                            | 38.2                     | 1.05         | 3.07        | 3.05        | 1.83         | 2.56         | -2.28        | -2.62       | -3.01       |
| BS13                                                                               | 15.2                            | 22.5                     | -1.07        | -3.21       | 2.38        | -3.15        | 2.20         | 2.02         | 2.83        | 2.37        |
| BS14                                                                               | 23.7                            | 28.7                     | -1.16        | -3.28       | 1.93        | 2.49         | -2.85        | 1.97         | 2.47        | 2.75        |
| BS257                                                                              | 19.0                            | 26.5                     | 0.33         | 3.27        | -2.97       | 3.06         | 2.59         | -2.21        | 2.40        | -2.68       |
| BS356                                                                              | 14.9                            | 21.1                     | 0.30         | 3.31        | 2.95        | -3.11        | 2.53         | -2.41        | -2.63       | 2.65        |
| BS467                                                                              | 21.6                            | 29.0                     | 0.43         | 3.28        | 3.14        | 3.18         | -2.79        | 1.77         | -2.64       | -2.76       |
| BS256                                                                              | 22.7                            | 30.2                     | 0.36         | 3.32        | -3.02       | 3.07         | 2.62         | -2.53        | -2.76       | 2.58        |
| BS267                                                                              | 16.6                            | 24.0                     | 0.44         | 3.46        | -2.95       | 3.26         | 2.66         | 2.32         | -2.68       | -2.76       |
| BS357                                                                              | 20.0                            | 26.2                     | 0.22         | 3.35        | 3.17        | -3.08        | 2.71         | -2.46        | 2.64        | -2.85       |
| BS367                                                                              | 19.7                            | 26.5                     | 0.40         | 3.40        | 3.21        | -2.93        | 2.64         | 2.17         | -2.71       | -2.45       |
| BS456                                                                              | 25.0                            | 31.6                     | 0.23         | 3.21        | 2.91        | 2.21         | -2.68        | -2.25        | -2.71       | 2.56        |
| BS457                                                                              | 24.8                            | 32.1                     | 0.14         | 3.28        | 2.89        | 2.80         | -2.65        | -2.14        | 2.15        | -2.73       |
| BS156                                                                              | 17.4                            | 23.8                     | 0.24         | -2.93       | 2.90        | 3.18         | 2.45         | -2.28        | -2.62       | 2.66        |
| BS157                                                                              | 16.3                            | 22.9                     | 0.17         | -2.91       | 3.19        | 2.95         | 2.50         | -2.10        | 2.61        | -2.67       |
| BS167                                                                              | 15.1                            | 21.5                     | 0.35         | -2.86       | 3.17        | 3.27         | 2.51         | 2.43         | -2.48       | -2.61       |
| BS235                                                                              | 11.0                            | 18.3                     | -0.41        | 3.31        | -2.84       | -2.98        | 2.83         | -1.88        | 2.65        | 2.81        |
| BS247                                                                              | 14.3                            | 22.5                     | -0.31        | 3.24        | -2.92       | 3.10         | -2.55        | 2.40         | 2.62        | -2.07       |
| BS346                                                                              | 10.1                            | 16.6                     | -0.37        | 3.31        | 3.00        | -3.13        | -2.62        | 2.24         | -1.76       | 2.73        |
| BS236                                                                              | 18.5                            | 24.0                     | -0.18        | 3.30        | -2.04       | -2.88        | 2.69         | 2.15         | -2.27       | 2.73        |
| BS237                                                                              | 24.6                            | 29.7                     | -0.27        | 3.26        | -1.81       | -2.60        | 2.71         | 2.18         | 2.67        | -2.45       |
| BS245                                                                              | 13.7                            | 21.5                     | -0.48        | 3.23        | -3.01       | 2.81         | -2.48        | -2.08        | 2.81        | 2.59        |
| BS246                                                                              | 17.9                            | 24.4                     | -0.25        | 3.24        | -2.78       | 3.00         | -2.54        | 2.39         | -2.47       | 2.86        |
| <b>BS345</b>                                                                       | <b>8.9</b>                      | <b>15.4</b>              | <b>-0.54</b> | <b>3.30</b> | <b>2.94</b> | <b>-3.09</b> | <b>-2.58</b> | <b>-2.27</b> | <b>2.72</b> | <b>2.86</b> |
| BS347                                                                              | 17.2                            | 25.2                     | -0.31        | 3.32        | 3.13        | -3.20        | -2.44        | 2.46         | 2.86        | -2.34       |
| BS126                                                                              | 15.1                            | 20.4                     | -0.53        | -3.29       | -2.78       | 3.25         | 2.57         | 2.27         | -0.55       | 2.93        |
| BS137                                                                              | 23.5                            | 31.9                     | -0.58        | -3.23       | 3.21        | -2.45        | 2.57         | 2.29         | 2.96        | -0.77       |
| BS145                                                                              | 21.4                            | 28.0                     | -0.54        | -3.30       | 2.85        | 3.23         | -2.48        | -1.97        | 2.67        | 2.98        |
| BS125                                                                              | 17.7                            | 24.2                     | -0.48        | -3.32       | -2.60       | 3.34         | 2.65         | -1.88        | 2.80        | 3.06        |
| BS17                                                                               | 15.8                            | 22.1                     | -0.14        | -3.33       | 2.08        | 2.82         | 2.35         | 2.31         | 1.43        | -2.80       |
| BS135                                                                              | 19.8                            | 27.6                     | -0.59        | -3.23       | 3.23        | -2.75        | 2.62         | -1.69        | 3.06        | 2.87        |
| BS136                                                                              | 30.5                            | 35.0                     | -0.35        | -2.20       | 3.06        | -2.56        | 2.60         | 2.29         | -1.90       | 2.75        |
| BS146                                                                              | 20.1                            | 26.1                     | -0.46        | -3.31       | 3.01        | 3.25         | -2.60        | 2.33         | -1.65       | 2.99        |
|                                                                                    |                                 |                          |              |             |             |              |              |              |             |             |
|                                                                                    |                                 |                          |              |             |             |              |              |              |             |             |
| <b>CBS<sub>26</sub>-2TH<sub>4,5</sub> (Ms = 1), QM-A region, r<sup>2</sup>SCAN</b> |                                 |                          |              |             |             |              |              |              |             |             |
|                                                                                    | $\Delta E(\text{polarized QM})$ | $\Delta E(\text{QM/MM})$ | Mo           | Fe1         | Fe2         | Fe3          | Fe4          | Fe5          | Fe6         | Fe7         |
| BS567                                                                              | 37.6                            | 42.1                     | 1.14         | 1.44        | 2.59        | 2.41         | 2.49         | -2.33        | -2.68       | -3.02       |
| BS234                                                                              | 7.8                             | 15.7                     | -1.05        | 3.32        | -2.77       | -2.90        | -2.41        | 2.17         | 2.53        | 2.68        |
| BS123                                                                              | 25.9                            | 33.0                     | -1.11        | -3.12       | -1.36       | -2.95        | 2.68         | 2.28         | 2.88        | 2.76        |
| BS124                                                                              | 21.6                            | 27.5                     | -1.10        | -3.32       | -2.76       | 3.31         | -2.36        | 2.26         | 2.70        | 3.00        |
| BS257                                                                              | 23.3                            | 29.7                     | 0.48         | 3.27        | -3.07       | 2.94         | 2.25         | -2.45        | 1.50        | -2.79       |
| BS356                                                                              | 22.5                            | 30.0                     | 0.33         | 3.30        | 2.73        | -3.19        | 1.98         | -2.43        | -2.78       | 2.02        |
| BS256                                                                              | 25.7                            | 32.9                     | 0.40         | 3.23        | -3.00       | 1.57         | 2.56         | -2.54        | -2.85       | 2.46        |



|       |      |      |       |       |       |       |       |       |       |       |
|-------|------|------|-------|-------|-------|-------|-------|-------|-------|-------|
| BS267 | 23.5 | 30.5 | 0.48  | 3.11  | -2.96 | 3.08  | 1.60  | 2.31  | -2.70 | -2.83 |
| BS357 | 27.5 | 32.9 | 0.21  | 3.24  | 1.28  | -2.94 | 2.63  | -2.44 | 2.64  | -2.74 |
| BS367 | 20.6 | 26.2 | 0.45  | 3.30  | 2.97  | -3.23 | 2.53  | 2.09  | -2.88 | -2.94 |
| BS456 | 31.8 | 38.7 | 0.30  | 3.24  | 2.79  | 1.10  | -2.62 | -2.40 | -2.82 | 2.10  |
| BS157 | 12.6 | 19.8 | 0.11  | -3.35 | 2.92  | 2.91  | 2.40  | -2.15 | 2.25  | -2.67 |
| BS167 | 7.1  | 15.6 | 0.40  | -3.33 | 2.89  | 3.09  | 2.39  | 2.39  | -2.66 | -2.66 |
| BS235 | 15.3 | 22.8 | -0.45 | 3.27  | -2.83 | -3.08 | 2.31  | -2.65 | 2.49  | 2.72  |
| BS247 | 13.8 | 20.4 | -0.20 | 3.25  | -2.97 | 3.09  | -2.55 | 2.12  | 1.95  | -2.80 |
| BS346 | 17.2 | 23.3 | -0.29 | 3.28  | 2.20  | -3.13 | -2.59 | 2.27  | -2.56 | 2.72  |
| BS236 | 11.3 | 18.0 | -0.08 | 3.36  | -3.13 | -3.21 | 2.62  | 2.19  | -2.50 | 2.66  |
| BS237 | 16.2 | 22.9 | -0.21 | 3.32  | -3.01 | -2.93 | 2.67  | 2.28  | 2.64  | -2.70 |
| BS245 | 20.0 | 26.5 | -0.26 | 3.24  | -2.93 | 2.80  | -2.42 | -2.46 | 1.37  | 2.33  |
| BS246 | 18.3 | 27.0 | -0.11 | 3.24  | -3.18 | 2.70  | -2.67 | 2.26  | -2.66 | 2.23  |
| BS345 | 15.4 | 21.0 | -0.22 | 3.31  | 2.98  | -3.07 | -2.45 | -1.75 | -0.36 | 2.85  |
| BS347 | 14.1 | 21.3 | -0.21 | 3.29  | 2.93  | -3.20 | -2.73 | 2.35  | 2.22  | -2.66 |
| BS126 | 13.0 | 19.6 | -0.20 | -3.27 | -2.84 | 3.09  | 2.57  | 2.25  | -2.46 | 2.84  |
| BS137 | 15.9 | 23.2 | -0.40 | -3.24 | 2.96  | -2.66 | 2.46  | 2.36  | 2.89  | -2.20 |
| BS145 | 19.1 | 25.3 | -0.61 | -3.32 | 2.76  | 2.53  | -2.73 | -2.00 | 2.68  | 2.68  |
| BS125 | 17.0 | 24.3 | -0.46 | -3.32 | -3.01 | 2.90  | 2.61  | -2.08 | 2.69  | 2.69  |
| BS127 | 12.1 | 19.5 | -0.30 | -3.31 | -2.86 | 3.15  | 2.58  | 2.34  | 2.72  | -2.14 |
| BS135 | 15.0 | 21.7 | -0.53 | -3.26 | 2.87  | -3.07 | 2.57  | -2.15 | 2.77  | 2.80  |
| BS136 | 11.6 | 18.4 | -0.38 | -3.23 | 2.95  | -3.06 | 2.55  | 2.28  | -1.79 | 2.80  |
| BS146 | 22.1 | 28.0 | -0.45 | -3.31 | 2.64  | 2.71  | -2.83 | 2.19  | -1.85 | 2.90  |
| BS147 | 15.2 | 21.7 | -0.45 | -3.36 | 3.14  | 3.15  | -2.72 | 2.38  | 2.59  | -2.65 |

**CBS<sub>26</sub>-2TH<sub>4,5</sub> (Ms = 0), QM-A region, r<sup>2</sup>SCAN**

|        | $\Delta E(\text{polarized QM})$ | $\Delta E(\text{QM/MM})$ | Mo    | Fe1   | Fe2   | Fe3   | Fe4   | Fe5   | Fe6   | Fe7   |
|--------|---------------------------------|--------------------------|-------|-------|-------|-------|-------|-------|-------|-------|
| BS1567 | 14.0                            | 20.4                     | 0.99  | -2.86 | 3.13  | 3.21  | 2.49  | -2.16 | -2.48 | -2.57 |
| BS234  | 14.0                            | 20.3                     | -1.01 | 2.87  | -3.15 | -3.20 | -2.50 | 2.15  | 2.49  | 2.59  |
| BS123  | 22.9                            | 28.4                     | -1.06 | -3.30 | -3.01 | -2.99 | 2.65  | 2.31  | 2.76  | 2.95  |
| BS124  | 17.5                            | 22.8                     | -1.04 | -3.33 | -3.08 | 2.89  | -2.67 | 2.25  | 2.47  | 2.77  |
| BS134  | 15.7                            | 23.8                     | -1.11 | -3.42 | 2.98  | -3.21 | -2.70 | 2.23  | 2.87  | 2.59  |
| BS2457 | 13.3                            | 20.9                     | 0.26  | 3.25  | -2.82 | 3.19  | -2.29 | -1.91 | 2.49  | -2.64 |
| BS2467 | 19.9                            | 25.6                     | 0.25  | 3.25  | -2.81 | 3.14  | -2.57 | 1.92  | -0.77 | -2.70 |
| BS2356 | 19.6                            | 25.3                     | 0.20  | 3.31  | -2.49 | -2.85 | 2.62  | -2.39 | -1.65 | 2.75  |
| BS267  | 29.4                            | 36.7                     | 0.63  | 3.18  | -3.05 | 3.02  | 1.08  | 1.32  | -2.98 | -2.92 |
| BS3567 | 17.6                            | 22.9                     | 1.02  | 3.33  | 3.09  | -2.88 | 2.64  | -2.28 | -2.45 | -2.75 |
| BS367  | 26.0                            | 32.5                     | 0.56  | 3.21  | 2.93  | -3.25 | 1.23  | 1.54  | -2.89 | -3.03 |
| BS156  | 24.8                            | 31.0                     | 0.35  | -3.30 | 1.18  | 3.02  | 2.36  | -2.46 | -2.64 | 1.90  |
| BS157  | 16.6                            | 23.1                     | 0.54  | -3.33 | 2.34  | 3.11  | 2.37  | -2.29 | 0.41  | -2.70 |
| BS167  | 13.8                            | 21.6                     | 0.60  | -3.32 | 2.73  | 2.73  | 2.21  | 1.12  | -2.65 | -2.77 |
| BS3456 | 12.8                            | 18.7                     | 0.20  | 3.30  | 2.99  | -3.11 | -2.60 | -2.28 | -1.89 | 2.81  |
| BS236  | 19.8                            | 27.4                     | -0.18 | 3.21  | -3.22 | -3.21 | 2.00  | 1.97  | -2.78 | 2.61  |
| BS237  | 18.8                            | 24.4                     | -0.17 | 3.32  | -3.09 | -3.25 | 2.57  | 2.24  | 1.72  | -2.87 |
| BS3467 | 19.7                            | 26.5                     | 0.18  | 3.30  | 2.97  | -3.13 | -2.65 | 2.41  | -0.82 | -2.43 |
| BS126  | 19.4                            | 26.9                     | -0.19 | -3.29 | -3.06 | 2.87  | 2.51  | 2.07  | -2.69 | 2.23  |
| BS137  | 18.8                            | 25.6                     | -0.33 | -3.24 | 2.88  | -3.22 | 2.47  | 2.21  | 2.62  | -2.80 |

|                                                                                    |      |      |       |       |       |       |       |       |       |       |
|------------------------------------------------------------------------------------|------|------|-------|-------|-------|-------|-------|-------|-------|-------|
| BS145                                                                              | 24.1 | 30.0 | -0.28 | -3.34 | 3.03  | 2.81  | -2.73 | -2.33 | 0.39  | 2.57  |
| BS125                                                                              | 19.8 | 26.5 | -0.18 | -3.30 | -2.93 | 3.17  | 2.66  | -2.42 | 0.61  | 2.50  |
| BS135                                                                              | 20.0 | 25.6 | -0.25 | -3.25 | 2.85  | -3.13 | 2.56  | -1.89 | 0.64  | 2.72  |
| BS136                                                                              | 13.6 | 20.8 | -0.30 | -3.25 | 2.85  | -3.19 | 2.31  | 1.88  | -2.49 | 2.64  |
| BS146                                                                              | 24.3 | 30.2 | -0.26 | -3.27 | 1.71  | 2.64  | -2.79 | 2.38  | -2.54 | 2.43  |
| BS147                                                                              | 19.4 | 25.3 | -0.23 | -3.31 | 2.50  | 2.85  | -2.64 | 2.36  | 1.70  | -2.74 |
| <b>CBS<sub>26</sub>-2TH<sub>4,5</sub> (Ms = 2), QM-C region, r<sup>2</sup>SCAN</b> |      |      |       |       |       |       |       |       |       |       |
| BS345                                                                              | 20.0 | 18.6 | -0.55 | 3.29  | 2.93  | -3.07 | -2.57 | -2.25 | 2.74  | 2.86  |

### Cartesian coordinates of structures

As additional supplementary material, we provide a compressed archive containing XYZ-files with optimized Cartesian coordinates (in Å) of the QM-regions and QM-cluster calculations of all calculated isomers.

## References

- (1) Spatzal, T.; Aksoyoglu, M.; Zhang, L.; Andrade, S. L.; Schleicher, E.; Weber, S.; Rees, D. C.; Einsle, O. Evidence for interstitial carbon in nitrogenase FeMo cofactor. *Science* **2011**, *334*, 940.
- (2) Dance, I. Survey of the Geometric and Electronic Structures of the Key Hydrogenated Forms of FeMo-co, the Active Site of the Enzyme Nitrogenase: Principles of the Mechanistically Significant Coordination Chemistry. *Inorganics* **2019**, *7*, 8.
- (3) Pang, Y.; Bjornsson, R. Understanding the Electronic Structure Basis for N<sub>2</sub> Binding to FeMoco: A Systematic Quantum Mechanics/Molecular Mechanics Investigation. *Inorg. Chem.* **2023**, *62*, 5357-5375.
- (4) Jiang, H.; Ryde, U. N(2) binding to the E(0)-E(4) states of nitrogenase. *Dalton transactions* **2023**.
- (5) Cao, L.; Caldararu, O.; Ryde, U. Protonation and Reduction of the FeMo Cluster in Nitrogenase Studied by Quantum Mechanics/Molecular Mechanics (QM/MM) Calculations. *J. Chem. Theory Comput.* **2018**, *14*, 6653-6678.
- (6) Benediktsson, B.; Bjornsson, R. Analysis of the Geometric and Electronic Structure of Spin-Coupled Iron-Sulfur Dimers with Broken-Symmetry DFT: Implications for FeMoco. *J. Chem. Theory Comput.* **2022**, *18*, 1437-1457.
- (7) Cao, L.; Ryde, U. Extremely large differences in DFT energies for nitrogenase models. *Phys. Chem. Chem. Phys.* **2019**, *21*, 2480-2488.
- (8) Cao, L.; Caldararu, O.; Ryde, U. Protonation States of Homocitrate and Nearby Residues in Nitrogenase Studied by Computational Methods and Quantum Refinement. *J. Phys. Chem. B* **2017**, *121*, 8242-8262.
- (9) Lukoyanov, D. A.; Yang, Z. Y.; Perez-Gonzalez, A.; Raugei, S.; Dean, D. R.; Seefeldt, L. C.; Hoffman, B. M. (13)C ENDOR Characterization of the Central Carbon within the Nitrogenase Catalytic Cofactor Indicates That the CF<sub>6</sub> Core Is a Stabilizing "Heart of Steel". *J. Am. Chem. Soc.* **2022**, *144*, 18315-18328.
